# Supplementary material for: Deciphering Transcriptional Networks during Human Cardiac Development
Source: Cells. 2022 Dec 3;11(23):3915. doi: 10.3390/cells11233915 (PMC9739390; doi:10.3390/cells11233915)
Supplement: Supplementary file 1 [file cells-11-03915-s001.zip › Supplementary Tables.xlsx]

## Sheet: Description
	Supplementary Table S1
	Top 3000 DEGs during directed cardiac differentiation of hiPSCs and their respective cluster (refer to Figure 3)
	Supplementary Table S2
	Top 3000 DEGs during murine cardiac development and their respective cluster (refer to Supplementary Figure S2)
	Supplementary Table S3
	List of the 216 Transcription Factors under study and their known involvment in human cardiac phenotype
	Supplementary Table S4
	Gene expression-based network predicting interactions between Transcription Factors
		TF_Source	Source Transcription Factor
		TF_Target	Target Transcription Factor
		Interaction_type	Interaction type (Activation or Inhibition)
		Correlation_Mean	Average MAC score
		Lag_Mean	Average time delay
		Correlation_hiPSC-A	MAC score for hiPSC-A line
		Lag_hiPSC-A	Average time delay for hiPSC-A line
		Correlation_hiPSC-B	MAC score for hiPSC-B line
		Lag_hiPSC-B	Average time delay for hiPSC-B line
		Correlation_hiPSC-C	MAC score for hiPSC-C line
		Lag_hiPSC-C	Average time delay for hiPSC-C line

## Sheet: Supplementary Table S1
GeneSymbol	Cluster
LOC105369306	A
ETV4	A
GABRB3	A
DLGAP1-AS2	A
ZIC2	A
GPC4	A
ZIC5	A
DCLK1	A
KLKB1	A
C16orf89	A
GLIPR1L1	A
CRYBB1	A
THY1	A
TERF1	A
RARRES2	A
CRIP3	A
PPM1N	A
ALPL	A
MICB	A
RHOH	A
ZSCAN10	A
HTATIP2	A
CHST4	A
SEPHS1	A
LOC100420587	A
PLPP2	A
SYT6	A
LINC00545	A
GSTO2	A
PYCARD	A
ESRP1	A
CYP2S1	A
EPHA1	A
DIAPH2	A
VASH2	A
GPR176	A
PTPRZ1	A
TRIML2	A
CLDN7	A
AP1M2	A
GDF3	A
HPAT5	A
C9orf135	A
MT1X	A
LNCPRESS2	A
POLR3G	A
USP44	A
DNMT3B	A
LOC101927668	A
SCGB3A2	A
FOXD3-AS1	A
NANOG	A
CNMD	A
LINC00678	A
TUBA4A	A
CBR1	A
PSMB8	A
IDO1	A
D21S2088E	A
PRDM14	A
LINC01795	A
CCL26	A
SYN3	A
DPPA2	A
LOC100126447	A
LCK	A
SLC44A3-AS1	A
LNCPRESS1	A
SOX2	A
CALB1	A
CER1	A
LEFTY1	A
NODAL	A
MT2A	A
MT1H	A
MT1G	A
NTS	A
GAL	A
LINC01356	A
VRTN	A
IFI30	A
SHISAL2B	A
SCG3	A
CDA	A
POU5F1	A
PMAIP1	A
CRABP1	A
L1TD1	A
DPPA4	A
ZFP42	A
LIN28A	A
CLDN10	A
OTX2	A
TDGF1	A
MIR302CHG	A
ESRG	A
LRRK1	A
LINC00458	A
PPP2R2B	B
JAKMIP2-AS1	B
SMPDL3B	B
LINC02570	B
GDPD2	B
PF4	B
LINC01447	B
LINC00707	B
CCDC172	B
TIMP4	B
HHLA1	B
LARGE2	B
ITGA6	B
BBS9	B
ANKRD18CP	B
DPPA3	B
GPR160	B
FZD5	B
NFE2L3	B
GNA14	B
HSD11B2	B
GLB1L3	B
PPP1R16B	B
KAT7	B
OCIAD2	B
MDN1	B
B3GNT7	B
PIM2	B
CRYGD	B
GRID2	B
LINC00428	B
GJC3	B
AHSP	B
ZDHHC22	B
PHC1	B
HLA-DRA	B
FAM124A	B
MT1F	B
MT1E	B
UPK1A	B
UPK1A-AS1	B
ARFGEF3	B
ADD2	B
CALN1	B
RABGAP1L	B
VSNL1	B
FABP6	B
CKMT1B	B
TSPAN33	B
EMSLR	B
DHX58	B
ZNF589	B
ACTL6B	B
CAMKV	B
DDX25	B
CKMT1A	B
ITGA2B	B
APOBEC3D	B
FLVCR2	B
PIWIL2	B
LINC02108	B
HLA-F	B
ZNF483	B
AASS	B
FGFBP3	B
WSCD1	B
C6orf99	B
FOSL1	B
GRTP1	B
RRM2B	B
PLS1	B
HLA-DMB	B
TNFRSF10A	B
NAP1L6P	B
PGM2L1	B
GALNT17	B
CACNA2D3	B
ZNF398	B
FOXO1	B
CRYBG1	B
EPB41L4B	B
LRP8	B
C6orf132	B
EPHA1-AS1	B
FLVCR1	B
FRAT2	B
NUDT6	B
PTAFR	B
TTC9	B
TMEM74	B
SHISA9	B
PRKCQ	B
MPV17L	B
DBNDD1	B
ATXN7L1	B
IER2	B
CORO1A	B
SLCO4A1	B
SLC6A6	B
BCAN	B
CCDC39	B
FBXL16	B
BTBD11	B
CHRDL1	B
NRARP	B
KLHDC7A	B
A2ML1	B
TCL1B	B
RDH12	B
MYMX	B
P2RX5	B
CDYL	B
DANCR	B
INTS13	B
METTL8	B
PYDC1	B
FAM155B	B
EAF2	B
POU2F3	B
PCSK1	B
SLC15A3	B
TESPA1	B
BEND3	B
HCP5	B
MALL	B
C12orf56	B
CGAS	B
ZNF860	B
CARD11	B
HSPA4	B
ZNF121	B
IGSF21	B
FAM221A	B
ZNF721	B
PAK1	B
GH2	B
OR2A1-AS1	B
CXCL6	B
CXCL5	B
SLC38A4	B
NRIP3	B
HORMAD2-AS1	B
C5orf63	B
ATCAY	B
RFLNB	B
KCNS3	B
UCMA	B
SOX2-OT	B
RORB	B
SEL1L3	B
GALNT3	B
CDCP1	B
KLK13	B
CTSC	B
RPL22L1	B
PVALB	B
NMRK2	B
KIF1A	B
PLAAT3	B
PIPOX	B
ACOXL	B
FAM160A1	B
ZNF433-AS1	B
DDB2	B
FLVCR1-DT	B
ECHDC3	B
CCDC151	B
ZNF883	B
SLC29A1	B
ADCY2	B
ZPLD2P	B
MATK	B
SYNGR3	B
RCN3	B
PDLIM1	B
N4BP3	B
TFR2	B
SMTN	B
UNC93B1	B
TXLNG	B
CTBP2	B
AEN	B
IGSF8	B
PLEKHF1	B
SLC25A21	B
PRDX1	B
TDRKH	B
PLA2G3	B
HMGN5	B
DPP3	B
RND2	B
ATP2A1-AS1	B
JAKMIP2	B
CYRIA	B
NPFFR2	B
KBTBD8	B
MTFP1	B
PGAM1	B
SCD	B
PPM1J	B
TCN2	B
DHCR24	B
TLCD1	B
NQO1	B
WDR72	B
AKR1C3	B
RAB17	B
ITLN2	B
TENT5B	B
SLC7A8	B
SCNN1A	B
KDF1	B
GLDC	B
MAL2	B
TJP3	B
PRSS16	B
CLDN3	B
GLYATL1	B
CLDN4	B
HHLA2	B
HMOX1	B
COBL	B
LOC100310756	B
MAP3K21	B
ITPR3	B
CRYBG2	B
TMEM125	B
RBM47	B
SH2D3A	B
MAP7	B
C1orf210	B
CRB3	B
VAT1L	B
SLCO4C1	B
CBLC	B
CRYM	B
TM4SF18	B
MARVELD3	B
TMEM30B	B
OCLN	B
SPINT1-AS1	B
PLEKHG6	B
SHANK2	B
ESRP2	B
LOC100288748	B
ERBB3	B
NR5A2	B
ONECUT1	B
MAMDC2	B
PANCR	B
PLA2G10	B
CLU	B
RBP5	B
METTL7B	B
STEAP1	B
IGSF1	B
FKBP11	B
F2RL1	B
SPTSSB	B
MMP9	B
ERVH48-1	B
GCNT4	B
ZNF165	B
AGO1	B
ZC3HAV1	B
EDIL3	B
TTC39C	B
LPAR6	B
TOX3	B
STON2	B
KCNK1	B
GRB7	B
BEND4	B
LOC100506098	B
MBP	B
FGD4	B
ARL4A	B
ITPR2	B
OSBPL10	B
CTSK	B
ITM2A	B
H4C11	B
TCF19	B
MNS1	B
C22orf15	B
CHRM3	B
FGD5	B
SLFN12	B
LIMD2	B
ARHGEF19	B
C3orf14	B
TP53	B
HAUS7	B
LPAR4	B
AIF1	B
CALCB	B
KLK8	B
SYT1	B
TMSB4X	B
CD200	B
RAB3C	B
MYC	B
SPP1	B
MACC1	B
UGT8	B
C19orf33	B
IFITM1	B
CD9	B
TFF3	B
CRMP1	B
MIAT	B
RMST	B
GNG3	B
TUBB3	B
STMN3	B
PARD6A	B
SEC11C	B
ATL1	B
INA	B
SOGA3	B
POU2F2	B
HES6	B
NEB	B
FABP7	B
TAGLN3	B
SNCG	B
SYT4	B
H1-1	B
HSPA2	B
ENHO	B
LINC00337	B
LINC02562	B
LINC00537	B
LINC-ROR	B
LINC00698	B
P3H2-AS1	B
CASP10	B
ANKRD35	B
EPHX3	B
FAR2	B
HERC5	B
NMI	B
LINC02617	B
ERVMER34-1	B
KCNMB2-AS1	B
TRABD2A	B
FGF19	B
SLC52A3	B
RRAS2	B
C1orf94	B
NLGN4X	B
PDZD4	B
EFCAB10	B
GPRC5B	B
RIT2	B
HAS3	B
M1AP	B
C13orf42	B
PLAAT5	B
GFPT2	B
SYT14	B
GABRA5	B
UNC13A	B
PCDH1	B
PALM3	B
LCTL	B
PCSK9	B
TMEM132B	B
SMIM24	B
OLFM1	B
MUC12-AS1	B
CABYR	B
MACC1-AS1	B
PDE6G	B
LDB2	B
MSL3P1	B
HENMT1	B
SPRY4-IT1	B
LRRC2	B
VANGL1	B
CASP3	B
TBX22	B
PYCR2	B
DTWD2	B
PLBD1	B
IL23A	B
MYORG	B
SLC37A1	B
GSC	B
LINC00941	B
LINC01426	B
IL17RD	B
FGF4	B
GAPLINC	B
SLC39A8	B
TTC39B	B
TGFA	B
SPRY4	B
QPCT	B
TSACC	B
GATD3A	B
PSMG4	B
PRPS1	B
NUP35	B
HPRT1	B
COQ3	B
PCCA-DT	B
EEF1AKMT4	B
HYLS1	B
GJB7	B
HTR7	B
FAM124B	B
SLC4A11	B
NOP16	B
DDX21	B
C1QBP	B
TIMM8A	B
MAK16	B
CHCHD4	B
EIF5A	B
SLIRP	B
HSPE1	B
PFN1	B
CHAC2	B
CDK2AP1	B
EMG1	B
PAK1IP1	B
GPATCH4	B
PINX1	B
TMEM177	B
C20orf27	B
FSD1	B
BOP1	B
TTLL12	B
EXOSC5	B
UNG	B
PUS7	B
SLC5A6	B
NLE1	B
LYAR	B
GNL3	B
NDC1	B
MSH2	B
ZNF649	B
SS18L2	B
EEF1E1	B
GGCT	B
AGTRAP	B
ALG6	B
PPCDC	B
TCOF1	B
MGME1	B
CARHSP1	B
ORC2	B
TEX10	B
PRELID1	B
RUVBL1	B
POP7	B
PNPLA3	B
TPST2	B
SLC39A14	B
FAM98A	B
ITGB5	B
FAM126A	B
ARHGEF35	B
SALL3	B
RRS1	B
STEAP3	B
TTYH1	B
PSTPIP1	B
PRKCQ-AS1	B
CXCL3	B
FCHO1	B
LINC00926	B
NUDT16P1	B
CD79B	B
CLPSL2	B
SPINK2	B
SRD5A3	B
AURKC	B
ZDHHC19	B
TYMSOS	B
TESMIN	B
MEIOC	B
HLA-A	B
HLA-C	B
SLFN13	B
PHLDA2	B
LOC101927572	B
ZNF670-ZNF695	B
CECR2	B
DDX11	B
EMC3-AS1	B
ACBD7	B
THEMIS2	B
CD70	B
UNC13B	B
OSBPL6	B
PIP5KL1	B
AP3B2	B
RARG	B
JADE2	B
BRINP1	B
ARMC4	B
GNAL	B
GALNT14	B
ARHGEF6	B
CABLES1	B
LINC01234	B
ADCYAP1R1	B
ST8SIA3	B
LFNG	B
NKAIN1	B
VENTX	B
SPIB	B
SLC13A3	B
HMSD	B
TCEAL2	B
RBFOX3	B
SLC6A15	B
FGF2	B
VSIG10	B
SEMA6A	B
ZNF101	B
SALL2	B
JARID2	B
ZNF66	B
LINC01873	B
PITPNC1	B
MREG	B
FHDC1	B
TC2N	B
TAF4B	B
SNHG26	B
RASGEF1A	B
LINC01315	B
CNFN	B
MAD2L2	B
ACOT7	B
RPL39L	B
RPSAP58	B
RDM1	B
SRY	B
FGFR4	B
TRIM14	B
HPDL	B
RNF135	B
LPCAT1	B
MTHFD2	B
MAN2A1	B
APBB2	B
TOR3A	B
JADE1	B
TCF7L1	B
OVOL2	B
NMNAT2	B
GPHA2	B
LOC105371267	B
GNAS-AS1	B
ECSCR	B
RAB19	B
GPM6B	B
SAPCD2	B
PREX2	B
KATNAL2	B
LINC00649	B
NQO2	B
ADGRV1	B
SLCO1A2	B
KIT	B
LEFTY2	B
LINC02525	C
SORL1	C
MIR205HG	C
PMEL	C
CD74	C
PLCH1	C
GUCA1A	C
KCNK5	C
TFAP2C	C
ABCG2	C
GRHL2	C
LRRN1	C
CDH1	C
PODXL	C
PRSS8	C
RAB25	C
PROM1	C
IQGAP2	C
CORO2A	C
CD24	C
MYO10	C
RGS16	C
LINC01980	C
FLT1	C
NRN1L	C
SYNE4	C
UGT3A2	C
AIF1L	C
MGST1	C
IMPA2	C
RAB3B	C
PPM1H	C
PPP2R1B	C
TPM3	C
ABRACL	C
IDH1	C
VAMP8	C
UCHL1	C
PIR	C
SLC7A5	C
PHGDH	C
PSAT1	C
PCK2	C
CTH	C
APOC1	C
APELA	C
CCKBR	C
FAR2P2	C
CHST9	C
FZD7	C
HLA-DMA	C
DYDC2	C
TEX15	C
DPH6	C
PPAT	C
MIS18A	C
RPA3	C
PAICS	C
DKC1	C
RFWD3	C
UTP18	C
APRT	C
ATIC	C
GNPNAT1	C
ZNF273	C
HACL1	C
NUDT15	C
DDX39A	C
BCL2L12	C
MTHFD1	C
NASP	C
ATP1B3	C
GCSH	C
AUNIP	C
ASF1B	C
IGFLR1	C
PKMYT1	C
GLA	C
PRIM2	C
SRSF7	C
MRPL11	C
HNRNPD	C
SNRPB	C
COMMD4	C
EXOSC3	C
SAAL1	C
NXT2	C
TDP1	C
GMNN	C
EXOSC9	C
LAS1L	C
CSE1L	C
NAE1	C
MPHOSPH6	C
GART	C
BUB3	C
LRR1	C
MTFR2	C
DSN1	C
CENPQ	C
RNASEH2B	C
RFC2	C
PCNA	C
RFC4	C
MCM3	C
CTPS1	C
ZNF670	C
XRCC2	C
NNAT	C
ZNF732	C
ZNF730	C
ZNF724	C
ZNF788P	C
ZNF93	C
CHEK2	C
NUDT1	C
HMGB3	C
UCP2	C
CD40	C
COCH	C
LIN28B	C
MYBL2	C
EPB41L2	C
TGIF1	C
STIL	C
ORC6	C
RNASEH2A	C
POC1A	C
CENPH	C
CDCA7	C
MCM2	C
ARHGEF39	C
RAD51	C
RMI2	C
CD52	C
GCNT1	C
CAPG	C
TAGLN2	C
FXYD5	C
NMU	C
KIF5C	C
DTX1	C
CCDC88C	C
WDR4	C
SLC43A3	C
RPS10-NUDT3	C
NLN	C
RCC2	C
SET	C
PSIP1	C
DPYSL2	C
PRPS2	C
ENPP1	C
RHEBL1	C
DRAXIN	C
PIF1	C
TICRR	C
GNG4	C
HLA-DOA	C
NELL2	C
FANCB	C
KNTC1	C
CHAF1B	C
ATAD5	C
ZGRF1	C
CDCA2	C
RAD54L	C
CDT1	C
ZNF215	C
LOC100128966	C
CDC25A	C
CENPV	C
CCDC138	C
SINHCAF	C
IPO5	C
DCP2	C
KIF3C	C
PASK	C
FKBP1B	C
G2E3	C
UBE2S	C
DBF4	C
NCAPD3	C
TTF2	C
HAUS6	C
RTKN2	C
RAD54B	C
MIS18BP1	C
MASTL	C
POLE2	C
BRCA1	C
OIP5	C
KIF22	C
RFC5	C
RMI1	C
TIMELESS	C
FBXO5	C
TRIP13	C
PARPBP	C
DLEU2	C
BORA	C
TRAIP	C
LIG1	C
SNRPA	C
CIT	C
CCDC74A	C
CENPI	C
H2AC12	C
E2F7	C
C1orf112	C
UHRF1	C
PSRC1	C
TACC3	C
GGH	C
FOXM1	C
FANCG	C
ESPL1	C
FOXA3	C
FOXH1	C
ARID3B	C
PLAU	C
PCYT1B	C
ACAT2	C
NETO1	C
LOC100422556	C
CENPA	C
HLA-DPA1	C
CYYR1	C
DIAPH3	C
COTL1	C
INAVA	C
MYCL	C
ZIC3	C
SALL1	C
LINC02387	C
CNTNAP2	C
GPR19	C
DUSP6	C
SALL4	C
HMGA1	C
TRIM71	C
SLC7A3	C
NR6A1	C
PLP1	C
OVOS2	C
EDNRB	C
TUBA1C	C
TKT	C
HELLS	C
ORC1	C
LINC01224	C
MAP4K1	C
ZNF90	C
WFDC2	C
KRTCAP3	C
TUBB2B	C
TUBB2A	C
GJA1	C
MUC12	C
STEAP1B	C
TUNAR	C
KIF15	C
EXO1	C
H4C3	C
ESCO2	C
CENPK	C
CDC45	C
CLSPN	C
CIP2A	C
ZWINT	C
FANCI	C
DHFR	C
PCLAF	C
CENPM	C
TK1	C
SKA1	C
RRM2	C
SKA3	C
FAM111B	C
BLM	C
CENPU	C
GINS1	C
VRK1	C
GINS2	C
FEN1	C
MCM7	C
DTL	C
CDC6	C
PRIM1	C
MCM5	C
MCM10	C
DNA2	C
FANCD2	C
RAD51AP1	C
CDCA5	C
PLK4	C
ZNF695	C
MCM6	C
CHEK1	C
MCM4	C
DDIAS	C
CHAF1A	C
RFC3	C
CDC7	C
ZWILCH	C
H2AZ1	C
RANBP1	C
BRCA2	C
GINS4	C
WDHD1	C
NCAPG2	C
DSCC1	C
ERCC6L	C
CYP26A1	C
EOMES	C
PPP1R17	C
TROAP	C
NCAPD2	C
KIF2C	C
CDCA8	C
CDK1	C
CDCA3	C
KIF4A	C
TPX2	C
NUF2	C
NDC80	C
NUSAP1	C
KIF20A	C
PRR11	C
CENPE	C
MKI67	C
ASPM	C
HMGB2	C
GTSE1	C
CCNA2	C
FAM83D	C
BUB1	C
CDKN3	C
KPNA2	C
KIF23	C
SGO2	C
KNSTRN	C
AURKA	C
ECT2	C
RRM1	C
UBE2T	C
ANLN	C
DEPDC1	C
CKAP2L	C
NEK2	C
KIFC1	C
CCDC18	C
KIF11	C
KNL1	C
SMC4	C
KIF18A	C
ARHGAP11A	C
C18orf54	C
CCNF	C
SPC24	C
H1-3	C
H1-5	C
H3C2	C
H3C4	C
TMSB15A	C
PLK1	C
HMMR	C
DLGAP5	C
CCNB1	C
AURKB	C
CDC20	C
CDC25C	C
BIRC5	C
CCNB2	C
UBE2C	C
CENPF	C
TOP2A	C
SPC25	C
NCAPH	C
MAD2L1	C
CKS1B	C
CENPN	C
CENPW	C
MELK	C
SGO1	C
SPAG5	C
TTK	C
HJURP	C
NCAPG	C
MND1	C
KIF20B	C
PTTG1	C
CKS2	C
BUB1B	C
PIMREG	C
DEPDC1B	C
H2BC9	C
PCAT14	D
HOXA1	D
P2RX3	D
CXCR4	D
ENPP2	D
SNAI1	D
CDX2	D
ANPEP	D
LIPG	D
RAB26	D
GCNA	D
CACHD1	D
CD1D	D
LZTS1	D
SEZ6L	D
TMEM154	D
LOC100506358	D
EVX1	D
LARP7	D
LOC283299	D
EOGT	D
CMKLR1	D
DLL1	D
ASB9	D
HVCN1	D
PCDH8	D
STK31	D
DRC7	D
DLL3	D
RIPPLY2	D
MIXL1	D
SP5	D
LINC00467	D
PPIAP46	D
TBXT	D
WNT3	D
TNFRSF11B	D
NCAN	D
MESP2	D
WNT8A	D
PCDH19	D
MESP1	D
SAMD3	D
LHX1	D
GAD1	D
SERPINE2	D
CA2	D
APLNR	D
SFTA1P	D
CAPN9	D
GLRA4	D
IL6	D
LINC01571	D
GRAP2	D
LINC01213	D
HHIPL2	D
LGI1	D
LRIG3	D
P3H2	D
LHX1-DT	D
PSKH2	D
GYPB	D
GYPE	D
PREX1	D
CBLN1	D
COL13A1	D
FOXC2	D
SPOCK3	D
ART5	D
HLA-DQA2	D
CCDC34	D
N4BP2L1	D
C3	D
PRDM1	D
FAM184A	D
COL9A2	D
KEL	D
THPO	D
TMEM92	D
CA14	D
CFAP300	D
PLPPR5	D
NOS2	D
GCNT2	D
PLCB1	D
GATA3-AS1	D
APCDD1L	D
CTHRC1	D
CCDC74B	D
ADRA2C	D
POLD1	D
FUOM	D
CMTM7	D
KCNK12	D
H2AC11	D
H2AC20	D
HS3ST3A1	D
COL26A1	D
NHS	D
C21orf58	D
POLE	D
LOC101927359	D
FBLN7	D
CDC42EP4	D
AMER3	D
PTCH1	D
EBF2	D
WFDC21P	D
ICAM1	D
NETO2	D
PCOLCE2	D
MYCN	D
TMPRSS11E	D
KCNE3	D
ECRG4	D
PAMR1	D
APOC1P1	D
EFHD1	D
CA4	D
HPGD	D
SELENOP	D
CHAC1	D
ADAM19	D
FST	D
SERPINB9	D
ELMO1	D
MAOA	D
KCNG1	D
ID3	D
SOCS2	D
ZNF124	D
RAB31	D
DERA	D
FSHR	D
TMEM54	D
FBLN1	D
WDR86-AS1	D
RUBCNL	D
FOXC1	D
ARHGAP24	D
MACROH2A2	D
ROR2	D
TWSG1	D
ITGA5	D
ARL4D	D
EGFLAM	D
SYNDIG1	D
PPFIBP1	D
CITED2	D
CDC42EP1	D
CDH18	D
CNTFR	D
KDR	D
USP18	D
DUSP5	D
GMPR	D
ATP1A2	D
TMTC1	D
ATOH8	D
ITGA9	D
MEIS1-AS2	D
NRXN3	D
GREB1L	D
EPOP	D
CCDC160	D
RASL10B	D
SP6	D
SNAI2	D
CDH11	D
SPON1	D
LRRC55	D
AMIGO2	D
ENC1	D
BGN	D
PAPPA	D
NPY	D
SEMA3E	D
PCDH10	D
CYP1B1	D
TNNT1	D
LGALS1	D
PRSS1	E
SH3KBP1	E
ALDH2	E
PCYT2	E
CSF2RA	E
PGF	E
C2orf91	E
BIN1	E
GATA2-AS1	E
GATA2	E
ID1	E
CTNNA2	E
LRRC4	E
DAB1	E
LRRTM1	E
BAALC	E
DYNC1I1	E
PSTPIP2	E
TMEM185A	E
HS6ST2	E
PAQR8	E
TP53I11	E
LYPD6	E
SPSB4	E
VAMP5	E
WDR86	E
ST8SIA1	E
EPHB6	E
ZNF611	E
LGR4	E
C8orf31	E
AMOTL2	E
AJUBA	E
CDK14	E
LPGAT1	E
HEG1	E
NKX3-1	E
ADAM28	E
FZD4	E
CYP27A1	E
ADAMTS12	E
ST3GAL6	E
TMEM135	E
LHFPL2	E
SMOC1	E
CCBE1	E
RGS2	E
LRRC32	E
CD82	E
STOM	E
SLC7A2	E
FUT8	E
PRXL2A	E
MEIS1-AS3	E
FYB2	E
PLPPR4	E
DDIT4L	E
CDC20B	E
ESM1	E
BMP10	E
KYNU	E
SERINC5	E
TMEM150C	E
EXPH5	E
ARMH4	E
HMCN1	E
NAALAD2	E
METTL24	E
SPINK4	E
CDH13	E
TAFA4	E
HOTAIRM1	E
FOXF1	E
GYPC	E
ITGA8	E
DKK1	E
TENM4	E
NME5	E
SOAT1	E
GLIPR2	E
LEF1	E
PCDH17	E
COLEC12	E
MAPK10	E
PLEKHA6	E
CRABP2	E
MOK	E
NTF3	E
FBLN2	E
PLCE1	E
NEO1	E
TNFAIP3	E
GAS1	E
COL6A6	E
NDNF	E
BAHCC1	E
BOC	E
LOC642366	E
ST8SIA2	E
CRB2	E
GLI3	E
NRIP1	E
ISYNA1	E
ZNF516	E
PKDCC	E
SOX5	E
KRT19	E
KRT18	E
KRT8	E
MXRA8	E
ANGPTL2	E
ARHGAP28	E
ARHGAP29	E
SYT10	E
SVEP1	E
ATP2B1	E
DSC2	E
SERPING1	E
PCOLCE	E
KIAA1217	E
THBS3	E
GPC6	E
CDH3	E
ADAMTS18	E
WASF1	E
TMEM141	E
UBE2J1	E
TMEM98	E
LAMB1	E
LIFR	E
AMOT	E
PDE3A	E
CCDC3	E
HEY1	E
CAMK1G	E
PRRX1	E
MYCT1	E
LINC01969	E
P2RY6	E
ELAPOR2	E
MYO6	E
ATF7IP2	E
CYB5D1	E
LOC100506207	E
ENPEP	E
IGDCC3	E
FGFR3	E
ODC1	E
ISM1	E
GRIN2A	E
GFRA2	E
CGA	E
TNFSF15	E
SLC9A3R1	E
BST2	E
AFAP1L2	E
TAC3	E
SHISA2	E
PRTG	E
HAPLN1	E
MSX1	E
JCAD	E
FAM89A	E
CFC1	E
BMPER	E
HAS2	E
DNAH2	E
GATA3	E
PTPN13	E
ARL4C	E
LAMA1	E
CTSV	E
PGA5	E
FRMD6	E
DIO2	E
CBLN2	E
SPX	E
HBE1	E
WFIKKN1	E
LINC00379	E
CA3	E
SLC2A3	E
FOLR1	E
UGT3A1	E
LCP1	E
LIX1	E
MEIS1	E
TMEM88	E
HAND1	E
DAB2	E
BMP4	E
FLRT3	E
TNC	E
VIM	E
TFPI	E
PDGFRA	E
TWIST1	E
CDK6-AS1	E
ISL1	E
MSX2	E
ALX1	E
ACP3	E
CPE	E
CREG1	E
MDK	E
CD99	E
MYOF	E
PLSCR5	E
LYPD6B	E
LRP1B	E
RGS13	E
RGS5	E
RGS4	E
SCARNA9	F
PLEKHO1	F
DAB2IP	F
FBXO17	F
SHB	F
RGS3	F
SGSM2	F
GBF1	F
CUL9	F
PLXNB2	F
SH2B1	F
REPIN1	F
MGAT4B	F
CPS1	F
TSPAN15	F
NOG	F
UNC5C	F
ADAMTS1	F
ID2	F
EFNA1	F
BAMBI	F
ZHX1	F
ASXL3	F
GATA5	F
MECOM	F
CPA1	F
LRRN4	F
EMP2	F
HOXB2	F
PARD6B	F
AXL	F
SHC2	F
CCDC102B	F
IDNK	F
PNMA8A	F
CD47	F
FZD6	F
PBX1	F
ANK3	F
LRATD2	F
LGI2	F
SLC47A1	F
SLC16A12	F
C8orf49	F
IL1RAPL1	F
CALB2	F
CYP39A1	F
DHDH	F
GALNT5	F
FAM210B	F
CSRNP3	F
MOG	F
ADAMTSL4	F
PRRT4	F
EYA1	F
DOCK9-DT	F
LINC01082	F
SLC34A2	F
LINC01099	F
CAVIN2	F
PTPRD-AS1	F
TLN2	F
CAB39L	F
GPRC5C	F
ARHGAP6	F
ATP2B1-AS1	F
KCNIP4	F
SERTM2	F
CTTNBP2	F
PRKCE	F
RERG	F
SERPINF1	F
NCALD	F
GADD45G	F
FERMT1	F
PAPPA2	F
EMCN	F
CRHBP	F
OIT3	F
NOSTRIN	F
ADGRG6	F
SYTL5	F
SLC1A3	F
CFTR	F
ANXA4	F
EPSTI1	F
WNT11	F
PRSS23	F
TPPP3	F
CDH10	F
LINC01697	F
SPTLC3	F
HS3ST1	F
XAGE2	F
TCIM	F
C15orf48	F
MFAP5	F
ABRA	F
FGF10	F
SC5D	F
BRINP2	F
ASTN1	F
STAC	F
PPFIA2	F
WNT5B	F
KIAA0319	F
S100A4	F
ZNF436-AS1	F
ICAM4	F
KLHL14	F
FZD4-DT	F
KDM6B	F
ZC2HC1A	F
SH3GLB1	F
ENTPD4	F
HIPK2	F
TMEM38B	F
DCP1A	F
CIBAR1	F
TMEM120A	F
GAMT	F
ANXA6	F
ANKMY2	F
MPC2	F
DSP	F
NAV2	F
DOK6	F
RBMS3-AS3	F
DACT3-AS1	F
ILDR2	F
NIPSNAP3A	F
SCMH1	F
IFI27L2	F
SSBP2	F
FAM228B	F
TMX4	F
ARL2BP	F
RBFOX2	F
IFIT1	F
COLGALT2	F
ANTXR2	F
EPB41L3	F
TANC2	F
PTPRD	F
DNAJC6	F
PRKCH	F
ORAI3	F
TMEM47	F
FIGN	F
PPP2R3A	F
ARHGAP42	F
ATP1B2	F
LINC02478	F
SLC30A3	F
CLCNKB	F
SHD	F
NID2	F
HOXB-AS1	F
SUSD4	F
DGAT2	F
MAPK4	F
VSTM2L	F
TGFB2-AS1	F
LINC01003	F
ALOX12-AS1	F
PRKN	F
RSPH14	F
RSPH9	F
LRMDA	F
RTL5	F
DDIT4	F
LINC01088	F
RARB	F
PMP22	F
CLSTN2	F
WLS	F
CDK6	F
GATA6	F
PCDH7	F
WNT5A	F
SLIT2	F
PLXNA2	F
DLC1	F
CADM1	F
ZEB2	F
COL5A1	F
FZD2	F
NRXN1	F
PDE11A	F
CGNL1	F
JAG1	F
HTRA1	F
EPHA4	F
ID4	F
BMP2	F
IRX3	F
CRNDE	F
SBF2-AS1	F
DACT1	F
IRX5	F
LINC02246	F
SDK2	F
FKBP9	F
SKIDA1	F
SPACA9	F
COL23A1	F
ADAMTS3	F
TSPAN18	F
SETD7	F
TTC28	F
ASXL1	F
FAM118A	F
ARHGEF17	F
H6PD	F
TNFSF4	F
ZNF781	F
DNAI4	F
PXMP2	F
CAST	F
ZNF521	F
CFAP221	F
RBP1	F
DCTN3	F
TSPAN3	F
C4orf48	F
RHOC	F
PON2	F
IFT88	F
PYGO1	F
RAI1	F
IER5L	F
PCBP4	F
MRC2	F
VASN	F
APLP1	F
LOC728392	F
TGFBR3	F
LINC02609	F
ANGPT2	F
ANKRD44	F
ADAMTS15	F
PLLP	F
MMP11	F
EPHB2	F
SPOPL	F
FAM110B	F
PHC2	F
PRR3	F
RBM4B	F
HHAT	F
ZNF703	F
GRK5	F
IQCE	F
FKBP10	F
P3H4	F
TCF25	F
SCARF2	F
GSTM2	F
PCDHGB6	F
DCHS1	F
MXD1	F
PURA	F
MYADM	F
REV3L	F
LPIN1	F
MLLT6	F
PTH1R	F
CFAP44	F
ANKRD36C	F
SPEF2	F
GARNL3	F
TSHZ2	F
SEMA6D	F
STRA6	F
TUBA3FP	F
EFEMP2	F
CTSB	F
YAF2	F
EPHB3	F
SMAD6	F
DDIT3	F
HERPUD1	F
NEDD9	F
GADD45B	F
GADD45A	F
PPP1R15A	F
CAMTA2	F
SYDE2	F
YJEFN3	F
TENT5A	F
NFATC2	F
P4HA1	F
PLOD2	F
IRF2BP2	F
TMEM263	F
CXXC4	F
SULT1C4	F
FAXDC2	F
ZNF467	F
CCDC183	F
VAMP2	F
ACSF2	F
PNRC1	F
UNC5B	F
KIAA0895	F
ENOX1	F
FSIP2	F
SYTL3	F
HMBOX1	F
DENND1B	F
ZFPM2	F
LYST	F
LIX1L	F
ZCCHC24	F
NMNAT1	F
C5orf24	F
TERF2IP	F
DNAJB4	F
SEPTIN6	F
ITPRID2	F
RRAGB	F
STX12	F
FYTTD1	F
USP47	F
ZMYND11	F
CALCOCO1	F
CD99L2	F
TEX264	F
SMDT1	F
CIRBP	F
WDR13	F
ZNF428	F
GUCY1B1	F
FBXL2	F
GIHCG	F
ING4	F
SLC35A1	F
VASH1	F
COL4A6	F
PROS1	F
COL4A5	F
NUCB2	F
MAGEH1	F
LEPROT	F
TMEM106C	F
SIRT2	F
TTC3	F
XPA	F
RUNX1T1	F
RGL1	F
CCDC92	F
EFNB3	F
DACT3	F
GNG11	F
FAHD1	F
ATG4A	F
SLC25A20	F
MGST2	F
GXYLT2	F
GASK1B	F
RCAN1	F
MIR22HG	F
TSHZ1	F
HOXB3	F
ADAMTS9	F
SCML1	F
HOXB4	F
ZNF503-AS2	F
PDZRN3	F
ZNF704	F
ZBTB16	F
WNT2	G
CAPN3	G
ODAM	G
RALYL	G
DOK4	G
SUGCT	G
MAP1A	G
VCAN	G
KCTD12	G
NDRG2	G
CREM	G
KANK1	G
PKIA	G
PYGM	G
IGFBP7	G
RFTN1	G
RBMS3	G
SMAD9	G
CAMK2D	G
FOXP1	G
SMTNL2	G
LNPEP	G
NNT	G
OXR1	G
FXYD6	G
RP9P	G
PLXNA4	G
ERBB4	G
PPIC	G
MLLT3	G
TBX2	G
FNIP2	G
ADHFE1	G
DENND5B	G
ARHGAP31	G
ST7	G
BTG1	G
SMARCD3	G
SPEG	G
PLD1	G
CACNA1D	G
RBM20	G
CLGN	G
TIPARP	G
PPP1R1A	G
FGF18	G
CNTN5	G
MYZAP	G
ESRRG	G
RASSF5	G
S1PR1	G
CHRM2	G
EPHA7	G
ATP1B1	G
ABAT	G
RSPO3	G
RXRG	G
LRRC52-AS1	G
SH3RF2	G
TBX2-AS1	G
MIR1-1HG-AS1	G
GPR183	G
ASPH	G
PGAM2	G
SRL	G
C16orf71	G
NAV2-AS2	G
PDK1	G
SGPP2	G
PPARGC1A	G
SNTA1	G
FSD2	G
CAMK2A	G
PLAAT1	G
DPP7	G
TMEM38A	G
HIPK3	G
DPF3	G
POPDC3	G
BVES	G
PGM5	G
PRKAG2	G
ATP2A2	G
CFL2	G
PWWP3B	G
VEGFA	G
MAP3K20	G
MEF2A	G
PALLD	G
LTBP1	G
SYNE1	G
RETREG1	G
TPM1	G
HACD1	G
MYLK3	G
STYXL2	G
RCSD1	G
PDE4D	G
FLNC	G
MYL9	G
CDH2	G
PTGES3L	G
JPH2	G
CAP2	G
PROX1	G
RBM24	G
KCNJ5	G
YPEL2	G
LOC107986163	G
KCNQ5	G
ALPK2	G
FBN2	G
DGKI	G
RHOBTB3	G
COL2A1	G
ANKRD1	G
NPPB	G
LRRN3	G
ACTA2	G
FRMD4B	G
GATA4	G
AMHR2	G
ZNF503	G
SEMA3C	G
ZEB1	G
NCAM1	G
MALAT1	G
KIF26B	G
MICAL2	G
TNFRSF19	G
HAND2	G
BMP5	G
GATA6-AS1	G
MEIS2	G
NRP1	G
LMOD1	G
TGFB2	G
PKP2	G
KIFAP3	G
GUCY1A1	G
MEF2C	G
VTCN1	H
GABRP	H
KCNMA1	H
IPO5P1	H
RAB36	H
FREM2	H
MGARP	H
AKR1B10	H
S100A10	H
METTL7A	H
AKR1B15	H
VGLL1	H
EPAS1	H
FMOD	H
TYRP1	H
SLC39A2	H
GPC3	H
SHISA3	H
DCX	H
CXCL14	H
OLFML1	H
COL1A2	H
SPARC	H
BNC1	H
RHOU	H
NCCRP1	H
TCF21	H
[truncated: 1,001 more rows]

## Sheet: Supplementary Table S2
GeneSymbol	Cluster
Nefm	A
Slc7a5	A
Arhgap8	A
Dner	A
Pcyt1b	A
Ttpa	A
Zbed5	A
Cpt1c	A
Klc3	A
Hmox1	A
Rac3	A
Hmces	A
Pnpla6	A
Pnp	A
Mtmr7	A
Cgref1	A
H2-Q2	A
Ascl2	A
Gls2	A
Plekhf2	A
Dhx16	A
Pmm1	A
Sema3e	A
Mkx	A
LOC102633824	A
H2-Bl	A
Crlf1	A
F5	A
Epb4.1l4a	A
Tdrd5	A
Sh3gl2	A
Tesk2	A
Sesn2	A
Fbxo2	A
Bnipl	A
Ccno	A
Fam83h	A
Aim1	A
Gpt2	A
Cyfip2	A
Gadd45a	A
Gm1564	A
Eda2r	A
Dennd2c	A
Plaur	A
Trib3	A
Epha2	A
Mael	A
Ddx43	A
Syce1	A
C77370	A
Lincenc1	A
Mal2	A
Crym	A
Triml1	A
Zfp819	A
Dmrt1	A
Prdm14	A
Socs3	A
Fgf17	A
Gm6792	A
Alox15	A
Pof1b	A
Wnt3	A
Pdcl2	A
Zp3	A
Accsl	A
Gm16233	A
Rbmxl2	A
2310007B03Rik	A
Fam25c	A
Il24	A
Hsd17b14	A
Zfp296	A
Cpeb1	A
Ttc39b	A
Ccdc122	A
Gm7325	A
Sfn	A
Tdrd12	A
Mei4	A
B230214O09Rik	A
2410007B07Rik	A
Calcoco2	A
Dppa3	A
Tcl1	A
1700097N02Rik	A
Gdf3	A
Lefty1	A
Ltb	A
Rasef	A
Psors1c2	A
4930566F21Rik	A
Nodal	A
Chac1	A
Myc	A
Esco2	A
Tyw3	A
Rdh11	A
Shroom2	A
Sh3yl1	A
Adat2	A
LOC101056057	A
Tor2a	A
Zcchc10	A
Rnf138	A
Slc25a14	A
Lipg	A
Mfsd2a	A
Smim3	A
Enox1	A
4930444M15Rik	A
Pim1	A
Rin1	A
Rgs17	A
Gm4924	A
Mitd1	A
Zfp428	A
Arl4c	A
Fam208a	A
Morc3	A
Tasp1	A
Nfatc2ip	A
Dock11	A
Aldh18a1	A
Ofd1	A
Swap70	A
Flna	A
Yrdc	A
Cbwd1	A
Pdcd2	A
Zc3h8	A
Dnajb6	A
Slco4a1	A
Gnat2	A
Zfp598	A
Sars	A
Nob1	A
Yars	A
Cars	A
Ubr7	A
Pi4k2a	A
Klhdc4	A
Ehd1	A
Ankrd28	A
Pdxk	A
Lactb2	A
Cyp7b1	A
Calb2	A
Adrb3	A
Pml	A
Slc1a4	A
BC023829	A
Sgk2	A
Fbxl16	A
Psma8	A
Akap12	A
Tmem40	A
Gm10451	A
Slc19a2	A
Vps52	A
Dhcr24	A
Gad1	A
Gm16880	A
Ano9	A
4930447C04Rik	A
Glod5	A
Plekhd1	A
Acbd7	A
Dnd1	A
Pmel	A
Rhox13	A
Rex2	A
Pla2g1b	A
Slc9b1	A
Uba1y	A
Gm17580	A
Ly6g6e	A
1700029P11Rik	A
Ptgs2	A
Irak3	A
Klf5	A
Liph	A
Fam162b	A
Tmem79	A
Kdm4c	A
D15Ertd55e	A
Hormad1	A
Galr2	A
Slc5a5	A
Hsf2bp	A
Pla2g10	A
Mia	A
2200002D01Rik	A
AA467197	A
Rhox9	A
Bid	A
Jade1	A
Pramef12	A
AU015836	A
Noxred1	A
Rnf17	A
Pik3cb	A
Ccrn4l	A
Setd4	A
Pnldc1	A
Exd1	A
Gabra5	A
Zfp941	A
Nmnat2	A
Gstt2	A
Tfe3	A
Pced1b	A
Atp10a	A
Tle4	A
Nmb	A
Cacna1b	A
Dpysl5	A
Lphn2	A
Ubr5	A
Myh9	A
Slc25a32	A
Helb	A
Zmynd8	A
Lars	A
Rabggta	A
Slco5a1	A
Pqlc3	A
Plcg2	A
Plekhb1	A
Cd274	A
Fxyd6	A
Galnt12	A
Ddit4	A
C77080	A
Gatsl3	A
Deptor	A
Gm2381	A
Zfp110	A
Lasp1	A
Stat4	A
Tmem238	A
Cdc42bpg	A
Trim2	A
Trim25	A
Lrrc8d	A
Map7	A
Kctd6	A
Jade2	A
Abcb1b	A
Dcxr	A
Dgka	A
Oas1a	A
Celf4	A
Rbm47	A
Pnma5	A
Cep170b	A
Crb3	A
Dhtkd1	A
Plcxd1	A
Sult4a1	A
Atf7ip2	A
B3gnt7	A
Zfp365	A
Celf5	A
Fgf5	A
Gm9564	A
Tjp3	A
Zfp418	A
Cgn	A
Slc35f2	A
2410012M07Rik	A
Ermp1	A
Pnma2	A
Fut9	A
Fzd5	A
Stmn3	A
Ldhc	A
Gpx2	A
Sigirr	A
Btla	A
A4galt	A
4930506M07Rik	A
Nthl1	A
Wdr31	A
Dhx40	A
Magel2	A
Pkp3	A
Wbscr27	A
Scpep1	A
Rell1	A
Cldn3	A
Cmtm4	A
Arg2	A
Gyltl1b	A
Tmem125	A
Gnpda1	A
Slmo1	A
Ttyh1	A
Pcsk1n	A
Ptpn6	A
Btbd11	A
Rab25	A
Msgn1	A
Defa-rs2	A
Camkv	A
Gli1	A
Chst15	A
Cds1	A
Gstt3	A
Hpdl	A
Glul	A
Tmem243	A
Nampt	A
Mt2	A
Abcc4	A
Abcc1	A
Blnk	A
Cyb561	A
Alpl	A
AU020094	A
Sycp3	A
Cbr3	A
Sgk1	A
Mreg	A
Klf9	A
Lypd6b	A
Sh3gl3	A
Grik3	A
Sulf1	A
Wnt5b	A
Grhl3	A
Moxd1	A
Pdgfrl	A
Irf6	A
Penk	A
Spint2	A
Smoc1	A
Slc40a1	A
Mpzl2	A
AI662270	A
Apln	A
Tcf15	A
Tubb2b	A
Rbm46	A
Specc1	A
Klhl13	A
Rpp25	A
Timp1	A
Aim2	A
Gab1	A
Phlda3	A
Rhbdf1	A
Ptgr1	A
Litaf	A
Dcaf4	A
Maff	A
B3gnt2	A
Ddx3y	A
Fam46b	A
Pim3	A
1190005I06Rik	A
Bbs2	A
Pex26	A
Rnf19b	A
AI467606	A
Adar	A
Adam23	A
Ckmt1	A
Limk2	A
Trp53inp1	A
Bbc3	A
Klf3	A
Zfp119b	A
Gm6712	A
Mtfr1	A
Pcsk1	A
Gm364	A
Chrna9	A
Crxos	A
Khdc3	A
1700008I05Rik	A
Aire	A
Plk3	A
Glud1	A
C130073F10Rik	A
Foxd3	A
Gpa33	A
Tex21	A
Naa11	A
Dazl	A
Adam8	A
Loxl4	A
Sox15	A
Cd9	A
Pstpip1	A
2310043M15Rik	A
AF067061	A
Cdkn2b	A
Cysltr1	A
Sat1	A
S100a10	A
Uqcr10	A
Acot9	A
Psmb10	A
Cxcl16	A
Eppk1	A
Slc25a40	A
Vwa5a	A
Zfp36	A
Nr4a1	A
Tcea3	A
Klf4	A
Dusp1	A
Fos	A
Ifih1	A
Serpini1	A
Anxa3	A
Klf2	A
Pipox	A
Cyp2s1	A
Coro1a	A
D10Bwg1379e	A
Pck2	A
Zbtb8a	A
Trim12c	A
Ddit4l	A
A230050P20Rik	A
Ppl	A
N4bp3	A
Card10	A
Fam129a	A
Pafah2	A
Chmp4c	A
Lonrf3	A
Wdr45	A
Ddx58	A
Manba	A
Cox6b2	A
Pxdc1	A
Hexb	A
Cebpb	A
Vsig10	A
Lrrk2	A
Tnfaip6	A
Cpne8	A
Pla2g7	A
Amhr2	A
Eps8	A
Mt1	A
Chst7	A
Stc2	A
Echdc2	A
Malat1	A
Lad1	A
Nt5e	A
9230114K14Rik	A
Slc29a1	A
Mif4gd	A
Agpat2	A
Parp14	A
Ccdc85a	A
Gsta3	A
Pltp	A
H2-K1	A
Rasl10a	A
Mvp	A
Bdnf	A
Cpxm2	A
Myh14	A
Igfbp3	A
Upp1	A
Mkrn1	A
Hck	A
Hspa1b	A
Vgll3	A
Nr5a2	A
Bcat2	A
Junb	A
Irf1	A
Relb	A
Ahnak2	A
Esrrb	A
F3	A
Ccng1	A
Cnksr1	A
Tap2	A
Mapkapk3	A
Psmb8	A
Psmb9	A
Calml4	A
Nupr1	A
Bst2	A
Anxa4	A
Pdlim2	A
Icam1	A
Parp9	A
Dtx3l	A
Naprt1	A
Oasl2	A
Usp18	A
Xaf1	A
Apobec1	A
Tapbp	A
Igtp	A
Erap1	A
Fgfbp1	A
Lgals3	A
S100a6	A
Gbp3	A
Irgm1	A
Ifitm3	A
Gbp2	A
Phf11d	A
Abcb1a	A
Neat1	A
Tuba4a	A
Lin28a	B
Tdgf1	B
Mtm1	B
Krt8	B
AK134344	B
Gldc	B
Emb	B
Dusp9	B
Slc2a3	B
Krt18	B
Trim71	B
Sall4	B
Phlda2	B
Cth	B
Dnmt3b	B
Tcfl5	B
Snhg3	B
Fgf8	B
Cdh1	B
Sox2	B
Spink3	B
Otx2	B
Cldn6	B
Cldn7	B
Cyp26a1	B
Esrp1	B
Ifitm1	B
Pou5f1	B
T	B
L1td1	B
Trap1a	B
Zic3	B
Eras	B
Nanog	B
Mageb16	B
Tdh	B
Fmr1nb	B
Sp5	B
Slc7a3	B
Trh	B
Spp1	B
Zfp42	B
Dppa5a	B
Morc1	B
Gbp2b	B
Fbxo15	B
Dppa2	B
Ooep	B
Dppa4	B
Zfp936	B
Rpl39l	B
AU018091	B
Dnmt3l	B
Nr0b1	B
Gtsf1l	B
Folr1	B
Fst	B
Zic2	B
Zic5	B
Pmaip1	B
Lrig3	B
Dll3	B
Vrtn	B
Mcf2	B
Eomes	B
Mixl1	B
Tgif1	B
Terf1	B
Syt9	B
Sfmbt2	B
Peg10	B
Rhox5	B
Gjb3	B
Slc39a4	B
Tmem54	B
Hook2	B
Slc7a7	B
Cdkn2a	B
1700019D03Rik	B
Pou3f1	B
1700007K13Rik	B
Fgf4	B
Zscan10	B
Coch	B
Tmem30b	B
Wfdc2	B
Gbx2	B
Prss8	B
Lhx1	B
Aass	B
Ccnb1ip1	B
E130012A19Rik	B
Pim2	B
Capsl	B
Ap1m2	B
Stx3	B
Lrp2	B
Camsap3	B
Grb7	B
Sowahb	B
Kcnk1	B
Spint1	B
Epcam	B
Kdf1	B
Rhebl1	B
Mtcl1	B
Scd1	B
Nefl	B
Tubb3	B
Steap1	B
Lrrc34	B
Ddx4	B
Gm13152	B
Gng3	B
2610305D13Rik	B
Lefty2	B
Cldn4	B
Zfp473	B
St14	B
Tfap2c	B
Tex19.1	B
Tacstd2	B
Tgm1	B
Slc6a15	B
Urah	B
Slc27a2	B
Ina	B
F2rl1	B
Stmn2	B
Pcolce2	B
Hmga2	C
Igfbp2	C
Apela	C
Bex2	C
Rps6ka6	C
Cadm1	C
Spin2c	C
Igf2bp1	C
Fam169a	C
Asns	C
Fndc3c1	C
Prtg	C
Has2	C
Amph	C
Crabp1	C
Crabp2	C
Isl1	C
Ect2	C
2010204K13Rik	C
Zwilch	C
Melk	C
Fbxo5	C
Cdca5	C
Trip13	C
Ncapg	C
Uhrf1	C
Plk1	C
Aurkb	C
Kif22	C
Gsg2	C
Cdc20	C
Cdt1	C
Lig1	C
Kntc1	C
Ap1s3	C
Prom1	C
Wnk3	C
Fam60a	C
Wasf1	C
Rad51	C
Cenph	C
Syce2	C
Nipsnap1	C
Phgdh	C
Mcm5	C
Ccnf	C
Espl1	C
Ptprf	C
Mcm3	C
Srm	C
Nop58	C
BC055324	C
Eme1	C
Adss	C
Basp1	C
Mthfd1l	C
Suv39h2	C
Eml4	C
Hells	C
Exo1	C
Rcc2	C
Pfas	C
Nap1l2	C
Ninl	C
Slc2a1	C
2610318N02Rik	C
Cdc6	C
Skp2	C
Sox11	C
Igf2bp2	C
B3gnt5	C
Elovl6	C
Hunk	C
Fn1	C
Tenm3	C
Nnat	C
Plac8	C
BC023969	C
1110006E14Rik	C
Mirg	C
Dusp4	C
Zfp7	C
Zfp850	C
D7Ertd715e	C
Pcgf6	C
Kbtbd8	C
Nolc1	C
Rimklb	C
Rps6ka1	C
Lrrc16a	C
Lrp11	C
Six4	C
Mns1	C
Lama1	C
Ly75	C
Foxh1	C
Psat1	C
Depdc1b	C
Mnd1	C
Car2	C
Dusp14	C
Znf41-ps	C
Ada	C
Ajuba	C
BB182297	C
Ripk4	C
Dyrk3	C
Msh6	C
Phc1	C
Ccdc120	C
Cul4b	C
Zfp934	C
Trim6	C
Mybl2	C
Map7d2	C
Etv5	C
Plch1	C
Taf7	C
Zfp280c	C
Ccdc160	C
Elavl2	C
Foxred2	C
Ocln	C
Soat1	C
Fbxl19	C
Trim28	C
Pole	C
Xpo6	C
Knop1	C
Mtmr4	C
Utp15	C
Gemin5	C
Naf1	C
Zfp566	C
Lrwd1	C
Rbm34	C
Zmym1	C
Wdr3	C
Tsr1	C
Pprc1	C
Ints2	C
Tex10	C
Palb2	C
Chtf18	C
Nup155	C
Polr1b	C
Nsun2	C
Wdr46	C
Ddx10	C
Urb2	C
Tars	C
Nhp2	C
Ccne1	C
Nop56	C
Dkc1	C
BC027231	C
Gnl3	C
Jade3	C
Dcaf17	C
Hsp90aa1	C
Atic	C
Ncl	C
Supt16	C
Ftsj3	C
Ddx21	C
Mybbp1a	C
Tcof1	C
Pdcd11	C
Utp20	C
Rrp12	C
Sfxn1	C
Tkt	C
Rcl1	C
Rcc1	C
Ddx18	C
Lyar	C
D19Bwg1357e	C
Ccdc86	C
Slc35g1	C
Orc2	C
Ppan	C
Wdr43	C
Gpatch4	C
Gtpbp4	C
Sdad1	C
Tcerg1	C
Chd1	C
Mthfd1	C
Cd24a	C
Pi4k2b	C
Dlg3	C
Zbtb12	C
Sfxn2	C
Fgfr2	C
Hn1l	C
Ppp2r1b	C
Ccp110	C
Mcm7	C
Mcm4	C
Timeless	C
Crmp1	C
Eno1	C
Slc7a6	C
Gen1	C
Fbl	C
Dis3	C
Wdhd1	C
Haus6	C
Nup107	C
Lrrc59	C
Gar1	C
Ruvbl1	C
Clhc1	C
Efna4	C
Sall1	C
Dhx9	C
Npm1	C
Nap1l1	C
Apex1	C
Cdc25a	C
Casc4	C
Pawr	C
2610034E01Rik	C
Pvrl2	C
Ltv1	C
Ssrp1	C
Fen1	C
Mapk1ip1l	C
Wdr89	C
Pabpn1	C
1600002H07Rik	C
Gspt2	C
Zfp811	C
E2f5	C
Trmt6	C
Zfp280b	C
Lpcat1	C
Prmt5	C
Orc6	C
Zfp105	C
Rfc5	C
Ska3	C
Tipin	C
Mtf2	C
Psrc1	C
Mthfd2	C
A930024E05Rik	C
Rrp15	C
Nup85	C
Nup43	C
Mphosph6	C
Seh1l	C
Ddx39	C
Luc7l	C
Hdac1	C
Eif1a	C
Caap1	C
Set	C
Oip5	C
Sgol1	C
Cdca2	C
Bora	C
5430416N02Rik	C
Taf1d	C
Hnrnpa1	C
Rad54b	C
Orc5	C
Shq1	C
Tada2a	C
Nup37	C
Nufip1	C
Orc1	C
Api5	C
Naa16	C
Ruvbl2	C
Nop2	C
Bag4	C
Fem1b	C
Nup50	C
Nop9	C
Pwp1	C
Nol10	C
Ddx46	C
Noc4l	C
Clp1	C
Rpp40	C
Clns1a	C
Mak16	C
Wdr74	C
Smn1	C
Lsg1	C
Gtf2h4	C
Dnttip2	C
Exosc3	C
Prim2	C
Dlgap5	C
Lbr	C
Hat1	C
Katnbl1	C
Pa2g4	C
Arhgdig	C
Agpat4	C
Exosc1	C
Nifk	C
Znhit6	C
Dbr1	C
Polr2h	C
3110082I17Rik	C
Prpsap2	C
2310010G23Rik	C
Efcab7	C
Tfdp1	C
Rars	C
Prpf3	C
Wrap53	C
Prpf40a	C
Aaas	C
Ap2a2	C
Hdgf	C
Mre11a	C
Esf1	C
Ppa1	C
Mcph1	C
Slc4a7	C
Fubp3	C
D15Ertd621e	C
Kpnb1	C
Eftud2	C
Cebpz	C
Bms1	C
Gpd2	C
Cwc22	C
Zfp239	C
Tmem237	C
Fam84b	C
Taf15	C
Fubp1	C
Zfp266	C
AK164218	C
1810032O08Rik	C
Hypk	C
Pdcd10	C
Znhit3	C
1810022K09Rik	C
Krt19	C
Grhl1	C
9130008F23Rik	C
Wnt4	C
Matn3	C
Sqle	C
Zdbf2	C
Diap3	C
Kifc1	C
Mkrn3	C
Myo5a	C
Enc1	C
Baz1a	C
Rps4l	C
A830080D01Rik	C
Cenpt	C
Poli	C
Smpdl3b	C
Atf4	C
Setx	C
Pycr2	C
Arl14ep	C
Dnajc2	C
Serpinb9b	C
Slc30a2	C
Kctd15	C
Brwd3	C
Epb4.1l5	C
Gata3	C
Etv2	C
Greb1l	C
Acvr2b	C
Greb1	C
Syt14	C
Rrp1b	C
Hsph1	C
Iqgap2	C
Hsd11b2	C
Myrfl	C
Dmrta2	C
Ubqln2	C
Podxl	C
Cfc1	C
Lhx1os	C
Pknox2	C
Ercc6l	C
Grwd1	C
Rqcd1	C
Cep78	C
Pphln1	C
Cdca7	C
Cpsf4	C
Nek4	C
Pus10	C
Gclc	C
Atm	C
Prdm2	C
Tpm3	C
Otud4	C
Rbm6	C
Inpp5f	C
Rrs1	C
Aen	C
Larp4	C
Rims2	C
Fam199x	C
Polg	C
Slc16a13	C
Hist1h3d	C
Bend3	C
Cecr2	C
Pde7a	C
Rnpep	C
Hist1h3f	C
Sf3b3	C
Wdr12	C
Hic2	C
Llgl2	C
Aqr	C
Ppat	C
Txnrd1	C
Thrap3	C
Eif4g1	C
Plet1	C
Ddt	C
Tfrc	C
Gfpt2	C
Pitx2	C
Ntf5	C
Bmp4	C
Rprm	C
Cited2	C
Nptx2	C
Fgf10	C
Tiparp	C
Slit3	C
Pgap1	C
Rims3	C
Mme	C
Sorl1	C
Nrp2	C
Gstt1	C
Efhd1	C
Kdm1a	C
Ctbp2	C
Brca2	C
Uba2	C
Zfp518a	C
Susd4	C
Simc1	C
Ppwd1	C
Zfp281	C
Msh2	C
Ddx11	C
Tert	C
Wdr5	C
Cpsf3l	C
Hspbap1	C
Tmem170	C
Srpk1	C
Nkrf	C
Pwp2	C
Cep290	C
Ddx41	C
Kdm5b	C
Ccnb1	C
Prpsap1	C
Txlng	C
Wdr92	C
Suz12	C
Tjp2	C
Sin3a	C
Tlk2	C
Gart	C
Riok2	C
Ash2l	C
Rbm48	C
Pop1	C
Nars	C
Senp3	C
Setd6	C
Gpn2	C
Nubp2	C
Ipmk	C
Gnl2	C
Heatr3	C
Nol8	C
Atp13a1	C
Polr3a	C
Zswim3	C
Ipo5	C
Usp9x	C
Polr1c	C
Exosc5	C
Grk6	C
Gm5595	C
Rassf7	C
B9d1	C
Hrsp12	C
Ttc27	C
Rnaseh1	C
Fcf1	C
Dus1l	C
Mphosph10	C
Gcsh	C
Clcn2	C
Slc44a4	C
Rab6b	C
Lsr	C
Uba6	C
Rif1	C
Vars	C
Fasn	C
Jarid2	C
Zmat3	C
Irs2	C
Scaf4	C
Cirh1a	C
Ddx20	C
Sec23b	C
Nop14	C
Wdr36	C
Etf1	C
Mars	C
Zc3h18	C
Smarca5	C
Xpo5	C
Larp1	C
Iars	C
Aars	C
Car13	C
Tcf7	C
Bcat1	C
Arhgef16	C
2810474O19Rik	C
Kif5c	C
Hook1	C
Dtl	C
Tnfrsf19	C
A030007N12Rik	C
Mir1949	C
Gdap10	C
Dtwd2	C
Xylb	C
Spag1	C
Xrcc5	C
Slc3a2	C
Zfp141	C
Aim1l	C
Ydjc	C
Slc25a1	C
G6pdx	C
BC048403	C
Enoph1	C
Ddx27	C
Noc3l	C
Nvl	C
Pir	C
Zswim1	C
Usp48	C
Ugt8a	C
Dock5	C
Taf4b	C
Myo10	C
3830417A13Rik	C
Rhox6	C
Mt4	C
Tpbg	C
Gli3	C
Elovl4	C
B4galnt4	C
Pak1	C
Fmnl2	C
Marveld2	C
Ptk7	C
Arhgef26	C
Tex15	C
Rab38	C
Fam117a	C
37865	C
Gli2	C
Lpar2	C
Fzd7	C
St6gal2	C
Tes	C
Calca	C
Igsf9	C
Mapk13	C
Il17rd	C
Cldn9	C
BC068157	C
Six1	C
Prdm1	C
Depdc7	C
Rhpn2	C
Efcab10	C
Dab1	C
Dnajc22	C
Pifo	C
Rab39b	C
Tle3	C
Aldh9a1	C
Tdrp	C
Slc43a2	C
Rassf6	C
Slc23a1	C
Gramd1b	C
Afp	D
Ttr	D
Apoa1	D
Rbp4	D
Apoc2	D
Prl8a2	D
Hoxa1	D
Hoxb1	D
Arg1	D
Foxa1	D
Car4	D
Apom	D
Apob	D
Slc2a2	D
Cubn	D
Amn	D
Mogat2	D
Dkk1	D
Pla2g12b	D
Vil1	D
Soat2	D
Foxa2	D
S100g	D
Cpm	D
Hoxd1	D
Pcdh8	D
Cdx4	D
Foxd4	D
Cdx1	D
Slc7a9	D
Pdzk1	D
Slc13a4	D
Apoa4	D
Sgpp2	D
Smlr1	D
Lgals2	D
Cdhr2	D
Car7	D
4933402E13Rik	D
Slc9a3r1	D
Reep6	D
Foxa3	D
Tmprss2	D
Slco4c1	D
2610528J11Rik	D
2210011C24Rik	D
Sp8	D
Fgf15	D
Cdx2	D
Wnt8a	D
Mesp1	D
Ms4a4d	D
Apoa2	D
Ambp	D
Plg	D
Fgg	D
Fgb	D
Aldob	D
A2m	D
Tdo2	D
Dmkn	D
Apoc1	D
Bhmt2	D
Mbl2	D
Adamts20	D
Gjb2	D
Dynlrb2	D
Nxf7	D
Adora2b	D
Fgf3	D
Abcc2	D
Cldn2	D
Lect2	D
Dll1	D
Prss12	D
Alx1	D
Gipc2	D
Irs4	D
Shh	D
Foxf1	D
Pdgfra	D
Cpn1	D
Slc34a2	D
Slc16a1	D
Lpar1	D
Slc16a9	D
Tmem82	D
Hoxb2	D
Mttp	D
Frzb	D
Tbx1	D
Ephb1	D
Zbtb16	D
Car14	D
Ctsh	D
Cxcr4	D
Sox17	D
Aplnr	D
Dram1	D
Pdlim4	D
Pcdh19	D
Hbb-bh1	E
Hba-x	E
Hemgn	E
Rhag	E
Klf1	E
Alcam	E
Vnn1	E
Rassf5	E
Ppp1r17	E
Cnn1	E
Prrx2	E
Cdkn1c	E
Capn6	E
Sema3a	E
3632451O06Rik	E
Palm2	E
Sphkap	E
Mpped2	E
Mybphl	E
Plvap	E
Homer2	E
Angpt1	E
Prkg1	E
Thbs4	E
Hapln1	E
Col2a1	E
Cck	E
Cpa2	E
Gata5	E
Bmp5	E
Wnt2	E
Mylpf	E
Tagln	E
Prss23	E
Cited1	E
Gpc3	E
Plac1	E
Prkar2b	E
Tspan6	E
Epb4.1l3	E
Igf2os	E
Dynlt1f	E
Scg5	E
Pcbd1	E
6330403K07Rik	E
Wscd2	E
Tmem2	E
Glrb	E
Slitrk5	E
Erc2	E
2010300C02Rik	E
Col11a1	E
Zc3hav1l	E
Pabpc4l	E
D430019H16Rik	E
Dact1	E
Xist	E
Stbd1	E
Vash2	E
Mest	E
Bmp7	E
Kif26b	E
Fbn2	E
A730054J21Rik	E
Col23a1	E
Heph	E
Tmem178	E
Tmem108	E
Runx1t1	E
Gpr124	E
Tanc2	E
Igf2r	E
Gpx3	E
Mllt3	E
Tal1	E
Pth1r	E
Smad6	E
Col13a1	E
Frem1	E
Foxc2	E
Asb4	E
Meis2	E
Ccnd2	E
Bmper	E
Micalcl	E
Flrt3	E
Mdk	E
Peg3	E
Dgkk	E
Shisa2	E
Bmp2	E
Prdm6	E
Slc35d3	E
Rspo3	E
Gabra4	E
Twist1	E
Col9a1	E
Gap43	E
Cnn2	E
Glipr2	E
Mgarp	E
Map1b	E
Id2	E
Lypd6	E
B3galnt1	E
Suco	E
Gmfb	E
Slc5a3	E
Rhou	E
Rgs9bp	E
Ugdh	E
Aif1l	E
Slc1a3	E
Jag1	E
Cxxc4	E
1700110I01Rik	E
Prmt8	E
Rnd2	E
Tgfb2	E
Wnt5a	E
Lgi2	E
Fign	E
Acp5	E
Lhx9	E
Tnnc2	E
Klk1	E
4930512H18Rik	E
Erv3	E
Tnnt3	E
Aox4	E
Arhgap1	E
Adcy1	E
Akr1b8	E
Gm266	E
Akap5	E
Otub2	E
Kcnmb1	E
Pnmt	E
Lmod1	E
Kcnf1	E
Hapln3	E
Col22a1	E
Lpp	E
Cnr1	E
Frmpd1	E
Hcn1	E
Cacna2d3	E
Pvalb	E
Avp	E
Plcxd3	E
Slc6a4	E
Rassf4	E
Slc18a2	E
Gatm	E
Vsnl1	E
Fam19a2	E
Rab33a	E
Rec114	E
Tmem163	E
Map3k8	E
Gramd1c	E
Hmga2-ps1	E
Itga6	E
Fam49a	E
Hsbp1l1	E
Csrp2	E
Tspan2	E
Pdlim5	E
D930003E18Rik	E
Bambi	E
Gem	E
Wnt11	E
Gm3715	E
Krt20	E
D330040H18Rik	E
Faim3	E
4833424O15Rik	E
Arhgap29	E
Trav9d-3	E
Acta2	E
Bcl2	E
Dok4	E
Slc51a	E
Rgs10	E
Exoc3l4	E
Rasd1	E
Ank3	E
Tbx2	E
Cpeb2	E
Asb12	E
Synpo2	E
Slco3a1	E
Tnfaip2	E
Scn4b	E
Trim54	E
Glcci1	E
Erbb2	E
Pgbd5	E
Eid1	E
Zfp521	E
Dnmt3a	E
Lcor	E
Bach2	E
Spon1	E
Ndn	E
Cacna1h	E
Ccdc88a	E
Sv2a	E
Efhd2	E
Arhgap6	E
Tusc3	E
Adh6b	E
Tnni2	E
Plxnc1	E
Igfbpl1	E
Tbx5	E
Smtnl2	E
Cd44	E
Samd14	E
Usp46	E
Fam115a	E
Slc22a17	E
Strn	E
Adam12	E
Nav1	E
Vav3	E
Thsd4	E
Prkab2	E
Tmtc4	E
Fgfrl1	E
Plxna4	E
Nfatc1	E
Add3	E
Klhl6	E
Serpinh1	E
Dnajb14	E
Synm	E
Cyp26b1	E
Ica1	E
Ntf3	E
Pdxp	E
Armcx2	E
Lsm8	E
Pde3b	E
Purg	E
Pafah1b2	E
Mageh1	E
Zfp422	E
Wls	E
Ccnjl	E
Skida1	E
Lrp4	E
Ptbp2	E
Socs6	E
Cep170	E
Hif1a	E
Fbxo16	E
Igsf3	E
Lrp12	E
Zfhx3	E
Sorcs2	E
BB212172	E
Lipa	E
Stox2	E
Gnaq	E
B3glct	E
AW493563	E
Gm10033	E
Casp3	E
Pbx2	E
Zfp516	E
H2afy2	E
Usp3	E
Unc5c	E
Klhl29	E
Zfp503	E
Nol4l	E
Slc22a23	E
Sox9	E
Pxdn	E
Papss1	E
Celsr1	E
P4ha1	E
Sema4c	E
Zfpm1	E
Stard8	E
Irx2	E
Irx1	E
Nfil3	E
Ift122	E
Oaf	E
Kctd1	E
Wnk4	E
Tgds	E
Gnb4	E
Fam102b	E
Abcb10	E
Man1a	E
AI506816	E
Tnc	E
Mgst2	E
Hey1	E
Tlx1	E
Grrp1	E
Cmtm8	E
Adm	E
Kitl	E
Hbb-y	F
Tnni1	F
Myh7	F
Nppa	F
Smpx	F
Myl2	F
Tnnt2	F
Nppb	F
Tecrl	F
Tnnc1	F
Mylk3	F
Mybpc3	F
Myom1	F
Actn2	F
Csrp3	F
Myl3	F
Ankrd1	F
Hspb7	F
Tnni3	F
Myl7	F
Myl4	F
Slc16a12	F
Ccdc141	F
Nebl	F
Abra	F
Myl1	F
Acta1	F
Slc4a1	F
Ahsp	F
Lpar3	F
Hey2	F
Tnnt1	F
Tbx18	F
Ednrb	F
Flrt2	F
Col5a2	F
Emilin2	F
Irx4	F
Nkx2-5	F
Cap2	F
Ppp1r3d	F
Alpk2	F
Gyg	F
Phactr2	F
Col4a5	F
Lama4	F
Fam78a	F
Qk	F
Igf1	F
2210016H18Rik	F
Mef2c	F
Enpep	F
Nrp1	F
Ctla2b	F
Ctla2a	F
Ppp1r3b	F
Bves	F
Clec14a	F
Ppp1r3c	F
Pam	F
Hopx	F
Fam198b	F
Antxr2	F
Filip1l	F
Fam189a2	F
Mlip	F
Lbh	F
L3hypdh	F
Serpinb6b	F
Ptges3l	F
Prkcdbp	F
Mmrn2	F
Prkaa2	F
Crip2	F
Xirp1	F
Cacna1c	F
Ryr2	F
Fhod3	F
Eno3	F
Casq1	F
Hspb3	F
Actc1	F
Klhl30	F
Unc45b	F
Myl9	F
Hspb2	F
Synpo2l	F
Rrad	F
S1pr1	F
Icam2	F
Ppp1r14c	F
Fsd2	F
Popdc2	F
Ldb3	F
Tmod1	F
Nexn	F
Pgm5	F
Asb2	F
Emcn	F
Ppargc1a	F
Trdn	F
Lmod2	F
Pgam2	F
Trim63	F
Cryab	F
Ttn	F
Myh6	F
Upk3b	F
Alas2	F
Lyz1	F
Lyz2	F
Zmat1	F
Tgm2	F
Fgl2	F
Mtus2	F
Srl	F
Ndrg4	F
Slc47a1	F
G0s2	F
1810011O10Rik	F
Rbm20	F
Gng11	F
Ppp2r3a	F
Cd34	F
Tmem204	F
Popdc3	F
Corin	F
Klhl41	F
Mov10l1	F
Adssl1	F
Lrrc39	F
Hrc	F
Tcap	F
Txlnb	F
Abcc9	F
Pygm	F
Lpl	F
Cox7a1	F
Lmod3	F
Itgb1bp2	F
Col3a1	F
Sdpr	F
Cav3	F
Sspn	F
Cox6a2	F
Pln	F
Gypa	G
Slc25a37	G
Clec1b	G
Abat	G
Wt1	G
Ankrd29	G
Lrrc75a	G
Fstl1	G
Slc36a4	G
Hcfc2	G
Nrep	G
Cntln	G
Tmem176a	G
Pter	G
Adamts1	G
Atp1b1	G
Bnc1	G
Cdh11	G
Ntm	G
Tgfbi	G
Plagl1	G
Dpysl3	G
Gpr126	G
Bmx	G
Gpr182	G
Dkk3	G
Npr3	G
Pdlim3	G
Igf2	G
Pygl	G
Nhsl2	G
Gamt	G
Gucy1b3	G
Zfp9	G
Igfbp5	G
Ramp2	G
Vcam1	G
Slc8a1	G
Ftcd	G
Gja4	G
Pirt	G
Mmd	G
Lix1l	G
Klhl23	G
Cep83	G
Tbx20	G
Smarcd3	G
Rbm24	G
Myocd	G
Pcdh7	G
Nr2f1	G
Tek	G
Ano4	G
Fbxo32	G
Irx5	G
Irx3	G
Gata6	G
Fli1	G
Bmi1	G
Rarb	G
Gm7120	G
Klhdc8b	G
Itm2a	G
5330426P16Rik	G
Neurl1b	G
Ypel2	G
Plxnd1	G
Afap1l1	G
Kcnh2	G
Prox1	G
Tie1	G
Ccdc80	G
Srpk3	G
Neurl2	G
Hk1	G
Apobec2	G
Ehbp1l1	G
Svil	G
Alpk3	G
Filip1	G
Cacnb2	G
Ptpla	G
Vamp2	G
Kcnj5	G
Smyd1	G
Hspa4l	G
Hipk3	G
Eng	G
Cdh2	G
Jph2	G
Usp13	G
Atcayos	G
Rtn2	G
Jazf1	G
Hdac9	G
Hcfc1r1	G
Mitf	G
Ugp2	G
Msrb3	G
Usp2	G
Pecam1	G
6230424C14Rik	G
Cd93	G
Zfpm2	G
Elk3	G
Jun	G
Ccm2l	G
Atxn1	G
Enpp4	G
Pf4	G
Armcx3	G
Adcy6	G
Rasl11b	G
Josd2	G
Plekho1	G
Higd1a	G
Fam195a	G
Rbms3	G
Fam46a	G
5430417L22Rik	G
Tcf21	G
5730508B09Rik	G
Dynlt3	G
Rhoj	G
Efnb3	G
Mmp15	G
Rhobtb1	G
Cdh5	G
Erg	G
Parm1	G
Olfml3	G
Nrk	G
Foxc1	G
Sfrp1	G
Mn1	G
Ildr2	G
Frk	G
Pcdh18	G
Cda	G
Vasn	G
Boc	G
Mylip	G
Dpp4	G
Lcp1	G
Egfl6	G
Wisp1	G
Epha3	G
Slc38a5	G
Kcne1l	G
Fam46c	G
Gria3	G
38961	G
Gbp8	G
Ch25h	G
Cybrd1	G
Fam167b	G
Tox	G
Hif3a	G
Adamtsl1	G
Cmtm3	G
Crtap	G
Wdsub1	G
Cemip	G
Pla2g4a	G
Tmem26	G
Megf10	G
Mfap2	G
Foxp2	G
Vegfc	G
Fat4	G
Osr1	G
Hmgn3	G
Rcn3	G
1110032F04Rik	G
Slc2a13	G
Rasgef1b	G
Mmgt2	G
Ccdc8	G
Ppic	G
Tsc22d2	G
Fzd8	G
1190002N15Rik	G
Marcks	G
Nbea	G
Fat3	G
Procr	G
Ten1	G
[truncated: 1,001 more rows]

## Sheet: Supplementary Table S3
Transcription_factor	Cluster	Involvment in human cardiac phenotype (DisGeNET)	Involvment in human cardiac phenotype (GWAS Catalog)
ETV4	A	NA	NA
NANOG	A	ST segment elevation myocardial infarction (C1536220)	NA
OTX2	A	Abnormality of cardiovascular system morphology (C4049796);Hypotension (C0020649);Situs inversus totalis (C4551493)	NA
POU5F1	A	Cardiomyopathy, Familial Idiopathic (C1449563);Complete atrioventricular block (C0151517);Congenital Heart Defects (C0018798);Congenital heart disease (C0152021);Coronary heart disease (C0010068);Hypertensive disease (C0020538);Idiopathic pulmonary hypertension (C0152171);LONG QT SYNDROME 3 (C1859062);Pulmonary arterial hypertension (C2973725);ST segment elevation myocardial infarction (C1536220)…	NA
PRDM14	A	NA	NA
SOX2	A	Abnormality of cardiovascular system morphology (C4049796);Cardiomyopathies (C0878544);Cardiomyopathy, Familial Idiopathic (C1449563);Congenital arteriovenous malformation (C0003857);Fabry Disease (C0002986);Patent ductus arteriosus (C0013274);Ventricular Septal Defects (C0018818)	NA
TERF1	A	Cardiovascular Diseases (C0007222);Coronary Arteriosclerosis (C0010054);Coronary Artery Disease (C1956346);Coronary heart disease (C0010068)	NA
ZFP42	A	NA	NA
ZIC2	A	Tetralogy of Fallot (C0039685)	NA
ZIC5	A	NA	NA
ZSCAN10	A	NA	NA
CARHSP1	B	NA	NA
FOSL1	B	Cardiovascular Diseases (C0007222);Congestive heart failure (C0018802);Heart failure (C0018801);Reperfusion Injury (C0035126)	NA
FOXO1	B	Atrial Premature Complexes (C0033036);Cardiomyopathies (C0878544);Cardiomyopathy, Familial Idiopathic (C1449563);Cardiovascular Diseases (C0007222);Chronic thromboembolic pulmonary hypertension (C2363973);Congestive heart failure (C0018802);Coronary Artery Disease (C1956346);Coronary heart disease (C0010068);Heart failure (C0018801);Heart Septal Defects (C0018816);Hypertensive disease (C0020538);…	Arterial stiffness (rs7331212);Arterial stiffness index (rs7331212)
GSC	B	NA	NA
HES6	B	NA	NA
MYC	B	Aortic Valve Insufficiency (C0003504);Atrial Premature Complexes (C0033036);Cardiomegaly (C0018800);Cardiomyopathy, Familial Idiopathic (C1449563);Complete trisomy 18 syndrome (C0152096);Congestive heart failure (C0018802);Coronary Restenosis (C0948480);Cryoglobulinemia (C0010403);Heart Diseases (C0018799);Heart failure (C0018801);Hypertrophic Cardiomyopathy (C0007194);Hypertrophic obstructive ca…	NA
NFE2L3	B	NA	NA
NR5A2	B	NA	NA
ONECUT1	B	NA	NA
OVOL2	B	NA	NA
POU2F2	B	Essential Hypertension (C0085580);Pericardial effusion (C0031039)	NA
POU2F3	B	NA	NA
RARG	B	Cardiotoxicity (C0876994);Heart Diseases (C0018799)	Anthracycline-induced cardiotoxicity in childhood cancer (rs2229774)
RORB	B	NA	NA
SALL2	B	NA	NA
SALL3	B	NA	NA
SPIB	B	Hypotension, Orthostatic (C0020651)	Primary biliary cholangitis (rs3745516);Systolic blood pressure (rs138877676)
SRY	B	Abnormality of cardiovascular system morphology (C4049796);Aortic coarctation (C0003492);Bicuspid aortic valve (C0149630);Complete atrioventricular block (C0151517);Coronary Artery Disease (C1956346);Gonadal Dysgenesis, 45,X (C0242526);Hypertensive disease (C0020538);Myocardial Infarction (C0027051);Pregnancy associated hypertension (C0852036);Prolonged QT interval (C0151878);Tachycardia (C003923…	NA
TBX22	B	Aortic Valve Stenosis (C0003507);Atrial Septal Defects (C0018817)	NA
TCF19	B	Complete atrioventricular block (C0151517)	NA
TCF7L1	B	NA	Pulse pressure (rs11689667);Pulse pressure (rs2366264);Pulse pressure (rs62162674)
TOX3	B	NA	NA
TP53	B	Acute myocardial infarction (C0155626);Aortic Aneurysm (C0003486);Aortic valve calcification (C0428791);Aortic Valve Insufficiency (C0003504);Atrial Fibrillation (C0004238);Atrial Premature Complexes (C0033036);Cardiac Arrest (C0018790);Cardiomegaly (C0018800);Cardiomyopathies (C0878544);Cardiomyopathies, Primary (C0033141);Cardiomyopathy, Dilated (C0007193);Cardiomyopathy, Familial Idiopathic (C…	Diastolic blood pressure (rs78378222);Pulse pressure (rs78378222)
VENTX	B	NA	NA
ZNF101	B	NA	Diastolic blood pressure (rs2304130)
ZNF121	B	NA	NA
ZNF165	B	Coronary heart disease (C0010068)	NA
ZNF398	B	NA	NA
ZNF483	B	NA	NA
ZNF589	B	NA	NA
ZNF649	B	NA	NA
ZNF66	B	NA	NA
ZNF721	B	NA	NA
ZNF860	B	NA	NA
ZNF883	B	NA	NA
E2F7	C	NA	NA
EOMES	C	Cardiomyopathy, Familial Idiopathic (C1449563)	PR interval (rs9826413)
FOXA3	C	Coronary Artery Disease (C1956346)	NA
FOXH1	C	Congenital Heart Defects (C0018798);Heterotaxy Syndrome (C3178805);HETEROTAXY, VISCERAL, 1, X-LINKED (C1844020);Heterotaxy, Visceral, 3, Autosomal (C1853444);Situs ambiguus (C0266642);Tetralogy of Fallot (C0039685);Transposition of Great Vessels (C0040761);Ventricular Septal Defects (C0018818)	NA
FOXM1	C	Acute myocardial infarction (C0155626);CARDIOMYOPATHY, FAMILIAL RESTRICTIVE, 1 (disorder) (C1861861);Cardiovascular Diseases (C0007222);Congestive heart failure (C0018802);Coronary Arteriosclerosis (C0010054);Coronary Artery Disease (C1956346);Coronary heart disease (C0010068);Heart failure (C0018801);Hypertensive disease (C0020538);Idiopathic pulmonary hypertension (C0152171);Ischemic cardiomyop…	NA
GRHL2	C	NA	NA
HMGA1	C	Acute myocardial infarction (C0155626);Coronary Artery Disease (C1956346);Coronary heart disease (C0010068);Myocardial Infarction (C0027051);Myocarditis (C0027059)	Systolic blood pressure (rs73744859)
MIS18BP1	C	NA	NA
MYBL2	C	Acute myocardial infarction (C0155626);Myocardial Infarction (C0027051);Von Hippel-Lindau Syndrome (C0019562)	NA
MYCL	C	NA	NA
NR6A1	C	NA	NA
SALL1	C	Atrial Septal Defects (C0018817);Patent ductus arteriosus (C0013274);Tetralogy of Fallot (C0039685)	Blood pressure measurement (high sodium and potassium intervention) (rs2030114);Blood pressure measurement (high sodium and potassium intervention) (rs2030114)
SALL4	C	Atrial Fibrillation (C0004238);Atrial Septal Defects (C0018817);Atrioventricular Septal Defect (C1389018);Cardiac Arrhythmia (C0003811);Congenital Heart Defects (C0018798);Endocardial Cushion Defects (C0014116);Holt-Oram syndrome (C0265264);Tetralogy of Fallot (C0039685);Ventricular Septal Defects (C0018818);Wildervanck syndrome (C0265239)	NA
TFAP2C	C	Tetralogy of Fallot (C0039685)	NA
TGIF1	C	Tetralogy of Fallot (C0039685)	NA
WDHD1	C	Atrial Fibrillation (C0004238);Atrial Septal Defects (C0018817);Cardiomyopathy, Familial Idiopathic (C1449563);Cardiovascular Diseases (C0007222);Congestive heart failure (C0018802);Coronary heart disease (C0010068);Heart failure (C0018801);Hypertensive disease (C0020538);Left Ventricular Hypertrophy (C0149721);Myocardial Ischemia (C0151744)	NA
ZIC3	C	Abnormality of cardiovascular system morphology (C4049796);Aortic Aneurysm (C0003486);Atrial Septal Defects (C0018817);ATRIOVENTRICULAR CANAL DEFECT (C1389016);Atrioventricular Septal Defect (C1389018);Cardiomegaly (C0018800);Common atrioventricular canal (C0221215);Common atrium (C0392482);Congenital atresia of mitral valve (C0344760);Congenital Heart Defects (C0018798);Congenital heart disease …	NA
ZNF215	C	NA	NA
ZNF273	C	NA	NA
ZNF670	C	NA	NA
ZNF695	C	NA	NA
ZNF724	C	NA	NA
ZNF730	C	NA	NA
ZNF732	C	NA	NA
ZNF788P	C	NA	NA
ZNF90	C	NA	NA
ZNF93	C	NA	NA
ATOH8	D	Pulmonary arterial hypertension (C2973725);Right Ventricular Hypertrophy (C0162770)	NA
CDX2	D	Myocardial Infarction (C0027051);Timothy syndrome (C1832916);Tricuspid Valve Stenosis (C0040963);Turner Syndrome (C0041408)	NA
EVX1	D	NA	Diastolic blood pressure x alcohol consumption (light vs heavy) interaction (2df test) (rs5883070);Mean arterial pressure x alcohol consumption (light vs heavy) interaction (2df test) (rs5883070);Systolic blood pressure x alcohol consumption (light vs heavy) interaction (2df test) (rs5883070)
FOXC1	D	Abnormality of cardiovascular system morphology (C4049796);Aortic coarctation (C0003492);Aortic valve disorder (C1260873);Aortic Valve Insufficiency (C0003504);ATRIAL SEPTAL DEFECT 1 (C1862389);Atrial Septal Defects (C0018817);Congenital Heart Defects (C0018798);Congenital heart disease (C0152021);Congestive heart failure (C0018802);Coronary Arteriosclerosis (C0010054);Heart failure (C0018801);Hy…	Systolic blood pressure (rs2745599)
HOXA1	D	Congenital Heart Defects (C0018798);Congenital heart disease (C0152021);Coronary heart disease (C0010068);Interrupted aortic arch (C0152419);Tetralogy of Fallot (C0039685);Transposition of Great Vessels (C0040761);Ventricular Septal Defects (C0018818)	NA
ID3	D	Myocardial Ischemia (C0151744);Reperfusion Injury (C0035126)	NA
LHX1	D	Cardiovascular Abnormalities (C0243050);Von Hippel-Lindau Syndrome (C0019562)	NA
MESP1	D	Congenital Heart Defects (C0018798);Congenital heart disease (C0152021);Coronary heart disease (C0010068);Double Outlet Right Ventricle (C0013069);Ventricular Septal Defects (C0018818)	NA
MESP2	D	Coronary Aneurysm (C0010051);Pulmonary Venous Return Anomaly (C4551905)	Coronary artery aneurysm in Kawasaki disease (rs12900413)
MIXL1	D	Aortic Valve Insufficiency (C0003504)	NA
MYCN	D	Cardiac Arrest (C0018790);Dissecting aneurysm of the thoracic aorta (C0729233);Mitral Valve Stenosis (C0026269);Patent ductus arteriosus (C0013274)	NA
PRDM1	D	Truncus Arteriosus, Persistent (C0041207)	Diastolic blood pressure (rs72613227)
SNAI1	D	22q11 Deletion Syndrome (C2936346);Atrial Fibrillation (C0004238);Atrioventricular Septal Defect (C1389018);Cardiomyopathy, Dilated (C0007193);Ehlers-Danlos Syndrome (C0013720);Endocardial Cushion Defects (C0014116);Hypertensive disease (C0020538);Idiopathic pulmonary hypertension (C0152171);Myocardial Infarction (C0027051);Rheumatic Heart Disease (C0035439);Total anomalous pulmonary venous retur…	NA
SNAI2	D	Cardiomyopathy, Familial Idiopathic (C1449563);Idiopathic pulmonary hypertension (C0152171);Tetralogy of Fallot (C0039685)	NA
SP5	D	NA	NA
SP6	D	Coronary Arteriosclerosis (C0010054);Coronary Artery Disease (C1956346);Coronary heart disease (C0010068)	NA
TBXT	D	NA	NA
ZNF124	D	NA	NA
FOXF1	E	Aortic Valve Stenosis (C0003507);Atrial Septal Defects (C0018817);ATRIOVENTRICULAR CANAL DEFECT (C1389016);Bicuspid aortic valve (C0149630);Congenital atresia of pulmonary valve (C0242855);Congenital heart disease (C0152021);Hypertensive disease (C0020538);Hypoplastic Left Heart Syndrome (C0152101);Patent ductus arteriosus (C0013274);Pulmonary arterial hypertension (C2973725);Pulmonary Valve Insu…	Systolic blood pressure (rs3851018)
GATA2	E	Aortic Valve Insufficiency (C0003504);Cardiovascular Abnormalities (C0243050);Coronary Arteriosclerosis (C0010054);Coronary Artery Disease (C1956346);Coronary heart disease (C0010068);Truncus Arteriosus, Persistent (C0041207)	Diastolic blood pressure (rs55914222);Pulse pressure (rs62270945);Systolic blood pressure (rs62270945)
GATA3	E	Acute myocardial infarction (C0155626);Congenital Heart Defects (C0018798);DiGeorge Syndrome (C0012236);Heart failure (C0018801);Hypertensive disease (C0020538);Mitral Valve Stenosis (C0026269);Myocardial Infarction (C0027051);Shprintzen-Goldberg syndrome (C1321551)	NA
GLI3	E	Aarskog syndrome (C0175701);Abnormality of cardiovascular system morphology (C4049796);Acute myocardial infarction (C0155626);Aortic coarctation (C0003492);Atrial Premature Complexes (C0033036);Atrial Septal Defects (C0018817);ATRIOVENTRICULAR CANAL DEFECT (C1389016);Congenital Heart Defects (C0018798);Coronary Arteriosclerosis (C0010054);Coronary Artery Disease (C1956346);Coronary heart disease …	Mean arterial pressure (alcohol consumption interaction) (rs7791745)
HAND1	E	Abnormality of cardiovascular system morphology (C4049796);Cardiac Arrhythmia (C0003811);Cardiomegaly (C0018800);Cardiomyopathies (C0878544);Cardiomyopathy, Dilated (C0007193);Cardiomyopathy, Familial Idiopathic (C1449563);Congenital Heart Defects (C0018798);Congenital heart disease (C0152021);Congestive heart failure (C0018802);Coronary heart disease (C0010068);Double Outlet Right Ventricle (C00…	Electrocardiogram morphology (amplitude at temporal datapoints) (rs10054375);Electrocardiogram morphology (amplitude at temporal datapoints) (rs10076602);Electrocardiographic traits (multivariate) (rs10054375);QRS complex (Cornell) (rs13185595);QRS duration (rs10076436);QRS duration (rs13165478);QRS duration (rs13185595)
HEY1	E	Aortic Valve Insufficiency (C0003504);Hypertensive disease (C0020538)	NA
ID1	E	Hypertensive disease (C0020538);Myocardial Ischemia (C0151744);Patent ductus arteriosus (C0013274);PATENT DUCTUS ARTERIOSUS 1 (C4282128)	NA
ISL1	E	Abnormality of cardiovascular system morphology (C4049796);Arrhythmogenic Right Ventricular Dysplasia (C0349788);Atrial Septal Defects (C0018817);Cardiomyopathy, Dilated (C0007193);Cardiomyopathy, Familial Idiopathic (C1449563);Congenital atresia of pulmonary valve (C0242855);Congenital Heart Defects (C0018798);Congenital heart disease (C0152021);Coronary heart disease (C0010068);Double Outlet Ri…	QT interval (rs190157126)
LEF1	E	Atrial Premature Complexes (C0033036);Pulmonary arterial hypertension (C2973725);Ventricular Fibrillation, Paroxysmal Familial, 1 (C2751898);Von Hippel-Lindau Syndrome (C0019562)	Diastolic blood pressure (rs7665304);Systolic blood pressure (rs67372037);Systolic blood pressure (rs7665304)
MEIS1	E	Cardiomyopathies (C0878544);Cardiovascular Diseases (C0007222)	Electrocardiogram morphology (amplitude at temporal datapoints) (rs11677371);Electrocardiographic traits (multivariate) (rs10865355);PR interval (rs10865355);PR interval (rs11677371);PR interval (rs11897119);PR interval (rs3891585);PR interval (rs4430933);PR interval (rs6724747);PR segment duration (rs11678354);Resting heart rate (rs62144050);Systolic blood pressure (rs2300481)
MSX1	E	ATRIAL SEPTAL DEFECT 1 (C1862389);Atrial Septal Defects (C0018817);Congenital Heart Defects (C0018798);Congenital heart disease (C0152021);Ostium secundum atrial septal defect (C0344724);Situs inversus totalis (C4551493)	Electrocardiographic conduction measures (rs2008242)
MSX2	E	ATRIAL SEPTAL DEFECT 1 (C1862389);Atrial Septal Defects (C0018817);Congenital Heart Defects (C0018798);Congestive heart failure (C0018802);Coronary Arteriosclerosis (C0010054);Foramen Ovale, Patent (C0016522);Hypertensive disease (C0020538);Myocardial Ischemia (C0151744);Ostium secundum atrial septal defect (C0344724);Patent ductus arteriosus (C0013274);Resistant hypertensive disorder (C0745130)	Resistant hypertension (rs11749255)
NKX3-1	E	NA	NA
PRRX1	E	Atrial Fibrillation (C0004238);familial atrial fibrillation (C3468561);Hypertensive disease (C0020538);Paroxysmal atrial fibrillation (C0235480);Persistent atrial fibrillation (C2585653);Situs inversus totalis (C4551493)	Atrial fibrillation (rs12142379);Atrial fibrillation (rs3903239);Atrial fibrillation (rs503706);Atrial fibrillation (rs520525);Atrial fibrillation (rs639652);Atrial fibrillation (rs651386);Atrial fibrillation (rs72700114);Calcific aortic valve stenosis (rs2150026);Early onset atrial fibrillation (rs3903239);PR interval (rs61824886);PR interval (rs61824887);Prevalent atrial fibrillation (rs577676)
SOX5	E	Atrial Fibrillation (C0004238);CREST Syndrome (C0206138);familial atrial fibrillation (C3468561);Mitral Valve Insufficiency (C0026266);Paroxysmal atrial fibrillation (C0235480);Persistent atrial fibrillation (C2585653)	Heart rate response to exercise (rs4246224);Heart rate response to recovery post exercise (rs4963772);PR interval (rs146974314);Resting heart rate (rs4963772);Systolic blood pressure (rs7976167);T wave morphology restitution during exercise (MTAG) (rs7307613);T wave morphology restitution during exercise (rs7307613);T wave morphology restitution during recovery from exercise (MTAG) (rs1396206);T …
TWIST1	E	Abnormality of cardiovascular system morphology (C4049796);Acute heart failure (C0264714);Acute myocardial infarction (C0155626);Aortic Valve Insufficiency (C0003504);Cardiomyopathy, Familial Idiopathic (C1449563);Cardio-Renal Syndrome (C2242703);Congenital abnormality of vein (C2937220);Congenital Heart Defects (C0018798);Congestive heart failure (C0018802);Heart failure (C0018801);Hypertensive …	Diastolic blood pressure (rs6963129);Pulse pressure (rs2107595);Systolic blood pressure (rs2107595)
ZNF516	E	NA	Pulse pressure (rs1047922)
ZNF611	E	NA	NA
BMP2	F	Alagille Syndrome (C0085280);Aortic Aneurysm (C0003486);Aortic aneurysm without mention of rupture NOS (C0340629);Atrial Septal Defects (C0018817);Atrioventricular Septal Defect (C1389018);Cardiac Arrhythmia (C0003811);Cardiomegaly (C0018800);Cardiomyopathies (C0878544);Cardiomyopathy, Familial Idiopathic (C1449563);Cardiotoxicity (C0876994);Cardiovascular Diseases (C0007222);Congenital heart dis…	Electrocardiogram morphology (amplitude at temporal datapoints) (rs11699612);Pulse pressure (rs11087740);QRS complex (Cornell) (rs3929778)
CAMTA2	F	Left Ventricular Hypertrophy (C0149721)	NA
DDIT3	F	Aortic valve calcification (C0428791);Coronary Artery Disease (C1956346);MELAS Syndrome (C0162671);Myocardial Infarction (C0027051)	NA
GATA5	F	Aneurysm of aortic arch (C0856748);Aortic coarctation (C0003492);Aortic valve calcification (C0428791);Aortic Valve Disease 1 (C3887892);Aortic valve disorder (C1260873);Aortic Valve Insufficiency (C0003504);Aortic Valve Stenosis (C0003507);Ascending aortic dissection (C1836653);Atrial Fibrillation (C0004238);ATRIAL FIBRILLATION, FAMILIAL, 1 (disorder) (C1843687);Atrial Septal Defects (C0018817);…	Diastolic blood pressure (rs200383755);Systolic blood pressure (rs200383755)
GATA6	F	Abnormality of cardiovascular system morphology (C4049796);Angina Pectoris (C0002962);Aortic coarctation (C0003492);Aortic Valve Stenosis (C0003507);Atrial Fibrillation (C0004238);ATRIAL FIBRILLATION, FAMILIAL, 1 (disorder) (C1843687);Atrial Flutter (C0004239);Atrial Septal Defects (C0018817);ATRIOVENTRICULAR CANAL DEFECT (C1389016);Atrioventricular Septal Defect (C1389018);Bacterial Endocarditis…	Electrocardiogram morphology (amplitude at temporal datapoints) (rs766320)
HMBOX1	F	NA	NA
HOXB2	F	NA	NA
HOXB3	F	Cardiovascular Diseases (C0007222)	Hypertension (rs117470167)
HOXB4	F	NA	NA
ID2	F	Congestive heart failure (C0018802);Coronary heart disease (C0010068);Heart failure (C0018801);Hypertensive disease (C0020538);Myocardial Infarction (C0027051)	Electrocardiogram morphology (amplitude at temporal datapoints) (rs10193517);Electrocardiogram morphology (amplitude at temporal datapoints) (rs6730558);Electrocardiographic traits (multivariate) (rs6730558);PR interval (rs3856447);PR interval (rs6730558)
ID4	F	NA	NA
IRX3	F	Tachycardia, Ventricular (C0042514)	Brugada syndrome (rs11645463)
IRX5	F	Congenital Heart Defects (C0018798);Viral myocarditis (C0276138)	NA
MECOM	F	Cardiovascular Diseases (C0007222);Coronary heart disease (C0010068)	Blood pressure (rs419076);Blood pressure (smoking interaction) (rs12634933);Calcific aortic valve stenosis (rs2421649);Diastolic blood pressure (cigarette smoking interaction) (rs419076);Diastolic blood pressure (rs1290788);Diastolic blood pressure (rs419076);Diastolic blood pressure (rs6779380);Diastolic blood pressure x alcohol consumption (light vs heavy) interaction (2df test) (rs1290784);Dia…
MXD1	F	Hypertrophic Cardiomyopathy (C0007194)	NA
NFATC2	F	Cardiovascular Diseases (C0007222);Congestive heart failure (C0018802);Heart failure (C0018801);Hypertensive disease (C0020538);Pulmonary arterial hypertension (C2973725);Right Ventricular Hypertrophy (C0162770)	Systolic blood pressure (rs6021247)
PBX1	F	Congenital heart disease (C0152021);Tetralogy of Fallot (C0039685)	NA
RARB	F	Abnormality of cardiovascular system morphology (C4049796);Patent ductus arteriosus (C0013274);Von Hippel-Lindau Syndrome (C0019562)	Pursuit maintenance gain (rs11711833)
REPIN1	F	NA	NA
SMAD6	F	Aneurysm of aortic arch (C0856748);Aneurysm of ascending aorta (C0856747);Aortic Aneurysm (C0003486);Aortic coarctation (C0003492);Aortic valve calcification (C0428791);Aortic Valve Disease 1 (C3887892);Aortic valve disorder (C1260873);Aortic Valve Insufficiency (C0003504);Aortic Valve Stenosis (C0003507);Ascending aortic dissection (C1836653);Bicuspid aortic valve (C0149630);Congenital anomaly o…	NA
TCF25	F	Myocardial Infarction (C0027051)	NA
TSHZ1	F	Aortic Aneurysm (C0003486);Atrial Septal Defects (C0018817);Cardiomyopathy, Familial Idiopathic (C1449563);Coronary heart disease (C0010068);Familial Cerebral Amyloid Angiopathy (C0268393);Hypertensive disease (C0020538);Ventricular Septal Defects (C0018818)	Systolic blood pressure (rs10460108);Systolic blood pressure (rs1898165)
TSHZ2	F	NA	Coronary artery aneurysm in Kawasaki disease (rs1293386)
ZBTB16	F	NA	NA
ZEB2	F	Atrial Septal Defects (C0018817);Bicuspid aortic valve (C0149630);Bilateral arterial duct (C0431501);Cardiac Arrest (C0018790);Congenital Heart Defects (C0018798);Congenital heart disease (C0152021);Coronary Artery Disease (C1956346);Ehlers-Danlos Syndrome (C0013720);Patent ductus arteriosus (C0013274);Perimembranous ventricular septal defect (C0344925);Pulmonary artery stenosis (C0238397);Pulmon…	Diastolic blood pressure (rs34570306);Diastolic blood pressure (rs62169544);Electrocardiogram morphology (amplitude at temporal datapoints) (rs17407658);Myocardial infarction (rs6740731)
ZFPM2	F	Abnormality of cardiovascular system morphology (C4049796);Atrial Septal Defects (C0018817);Cardiomyopathies (C0878544);Cardiovascular Diseases (C0007222);Congenital Heart Defects (C0018798);Congenital heart disease (C0152021);CONOTRUNCAL HEART MALFORMATIONS (disorder) (C1857586);Coronary Arteriosclerosis (C0010054);Coronary Artery Disease (C1956346);Coronary heart disease (C0010068);Double Outle…	Brugada syndrome (rs72671655);Coronary artery calcification (rs2622633);Coronary artery disease (rs10093110);Coronary artery disease (rs28416651);Coronary artery disease (rs302953);Electrocardiogram morphology (amplitude at temporal datapoints) (rs147543128);Electrocardiogram morphology (amplitude at temporal datapoints) (rs72671655);Myocardial infarction (rs4734875);PR interval (rs12678719);PR i…
ZNF428	F	NA	NA
ZNF467	F	NA	Pulse pressure (rs73727605)
ZNF521	F	NA	NA
ZNF703	F	NA	NA
ZNF704	F	NA	NA
ZNF781	F	NA	NA
ESRRG	G	Cardiac Arrhythmia (C0003811);Cardiac Hypertrophy (C1383860);Cardiomegaly (C0018800);Hypertensive disease (C0020538);Hypertrophic Cardiomyopathy (C0007194);Hypertrophic obstructive cardiomyopathy (C4551472)	Cardiac hypertrophy (rs12757165);Electrocardiogram morphology (amplitude at temporal datapoints) (rs1532501);Mean arterial pressure (alcohol consumption interaction) (rs17669622)
FOXP1	G	ATRIOVENTRICULAR CANAL DEFECT (C1389016);Atrioventricular Septal Defect (C1389018);Cardiomyopathy, Familial Idiopathic (C1449563);Congenital Heart Defects (C0018798);Congestive heart failure (C0018802);Coronary heart disease (C0010068);Heart failure (C0018801);Hypoplastic Left Heart Syndrome (C0152101)	Electrocardiogram morphology (amplitude at temporal datapoints) (rs114564188);PR interval (rs74537277)
GATA4	G	Abnormality of cardiovascular system morphology (C4049796);Acute myocardial infarction (C0155626);Angina Pectoris (C0002962);Aortic coarctation (C0003492);Aortic Valve Stenosis (C0003507);Atrial Fibrillation (C0004238);ATRIAL FIBRILLATION, FAMILIAL, 1 (disorder) (C1843687);Atrial Flutter (C0004239);Atrial septal aneurysm (C0521533);Atrial septal defect 2 (C1842778);Atrial Septal Defects (C0018817…	Atrial fibrillation (rs35620480);Brugada syndrome (rs804281);Left ventricular global circumferential strain (MTAG) (rs13278982);Left ventricular global longitudinal strain (MTAG) (rs13278982);Systolic blood pressure x alcohol consumption interaction (2df test) (rs36038176);Systolic blood pressure x alcohol consumption interaction (2df test) (rs3735814)
HAND2	G	22q11 Deletion Syndrome (C2936346);Abnormality of cardiovascular system morphology (C4049796);Atrial Fibrillation (C0004238);Atrioventricular Septal Defect (C1389018);Cardiac Hypertrophy (C1383860);Cardiomegaly (C0018800);Cardiomyopathies (C0878544);Cardiomyopathy, Dilated (C0007193);Cardiomyopathy, Familial Idiopathic (C1449563);Congenital Heart Defects (C0018798);Congenital heart disease (C0152…	Atrial fibrillation (rs10520260);Atrial fibrillation (rs17059534);Atrial fibrillation (rs7698692);Early onset atrial fibrillation (rs4615152);Electrocardiogram morphology (amplitude at temporal datapoints) (rs6824178);PR interval (rs13131421)
MEF2A	G	Cardiac Arrhythmia (C0003811);Cardiomyopathies (C0878544);Cardiomyopathy, Dilated (C0007193);Cardiomyopathy, Familial Idiopathic (C1449563);Cardiovascular Diseases (C0007222);Congestive heart failure (C0018802);Coronary Arteriosclerosis (C0010054);Coronary Artery Disease (C1956346);CORONARY ARTERY DISEASE, AUTOSOMAL DOMINANT, 1 (C1842247);Coronary heart disease (C0010068);Familial dilated cardiom…	Systolic blood pressure (rs2581468);Systolic blood pressure (rs4965529)
MEF2C	G	Arrhythmogenic Right Ventricular Dysplasia (C0349788);Cardiomyopathies (C0878544);Cardiomyopathies, Primary (C0033141);Cardiomyopathy, Familial Idiopathic (C1449563);Congenital Heart Defects (C0018798);Congenital heart disease (C0152021);Congestive heart failure (C0018802);Coronary heart disease (C0010068);D - transposition of the great vessels (C1275836);Double Outlet Right Ventricle (C0013069);…	NA
MEIS2	G	Aortic coarctation (C0003492);Aortic valve calcification (C0428791);Atrial Septal Defects (C0018817);Cardiac Malformation, Cleft Lip-Palate, Microcephaly and Digital Anomalies (C1832950);Congenital Heart Defects (C0018798);Heart Septal Defects (C0018816);Myocardial Infarction (C0027051);Tetralogy of Fallot (C0039685);Ventricular Septal Defects (C0018818)	NA
PROX1	G	Cardiomyopathy, Dilated (C0007193);Congenital Heart Defects (C0018798);Hypoplastic Left Heart Syndrome (C0152101);Myocardial Infarction (C0027051)	Electrocardiogram morphology (amplitude at temporal datapoints) (rs340849)
RXRG	G	Myocardial Ischemia (C0151744)	Electrocardiogram morphology (amplitude at temporal datapoints) (rs10918192)
SMAD9	G	Essential Hypertension (C0085580);Hypertensive disease (C0020538);Idiopathic pulmonary hypertension (C0152171);Pulmonary arterial hypertension (C2973725)	Coronary artery disease (rs9547692)
TBX2	G	Atrial Septal Defects (C0018817);Atrioventricular Septal Defect (C1389018);Cardiac Arrhythmia (C0003811);Congenital Heart Defects (C0018798);Congenital heart disease (C0152021);Coronary heart disease (C0010068);Double Outlet Right Ventricle (C0013069);Endocardial Cushion Defects (C0014116);Hypertensive disease (C0020538);Patent ductus arteriosus (C0013274);Preexcitation Syndrome (C0032915);Pulmon…	Diastolic blood pressure (rs2240736);Diastolic blood pressure (rs8068318);Hypertension (rs8068318);Mean arterial pressure (rs8068318);Pulse pressure (rs2240736);Pulse pressure (rs8068318);Systolic blood pressure (rs2240736);Systolic blood pressure (rs8068318)
ZEB1	G	Congestive heart failure (C0018802);Heart failure (C0018801);Myocardial Infarction (C0027051);Myocardial Ischemia (C0151744);Patent ductus arteriosus (C0013274);PATENT DUCTUS ARTERIOSUS 1 (C4282128)	NA
ZNF503	G	NA	NA
BNC1	H	NA	NA
CEBPD	H	Acute myocardial infarction (C0155626);Cardiovascular Diseases (C0007222);Inflammatory cardiomyopathy (C3532222);Ischemic cardiomyopathy (C0349782);Myocardial Infarction (C0027051);Myocardial Ischemia (C0151744)	NA
CREB3L1	H	NA	Systolic blood pressure (rs72910063)
CREB5	H	Atrial Fibrillation (C0004238);familial atrial fibrillation (C3468561);Paroxysmal atrial fibrillation (C0235480);Persistent atrial fibrillation (C2585653)	Atrial fibrillation (rs6462078);Atrial fibrillation (rs6462079);Pulse pressure (rs5883154);Pulse pressure (rs917275)
DACH1	H	Cardiovascular Diseases (C0007222)	Diastolic blood pressure (rs3861113)
EPAS1	H	Aortic Valve Insufficiency (C0003504);Complete atrioventricular block (C0151517);Congenital heart disease (C0152021);Coronary Arteriosclerosis (C0010054);Coronary heart disease (C0010068);Heart Failure, Right-Sided (C0235527);Hypertensive disease (C0020538);Idiopathic pulmonary hypertension (C0152171);Myocardial Infarction (C0027051);Myocardial Ischemia (C0151744);OVERLAP CONNECTIVE TISSUE DISEAS…	Electrocardiogram morphology (amplitude at temporal datapoints) (rs2121266);P wave duration (rs11689011);P wave duration (rs11894252);PR interval (rs11689011);PR interval (rs11894252)
FOSL2	H	Cardiomyopathies (C0878544);Hypertensive disease (C0020538);Idiopathic pulmonary hypertension (C0152171);Pulmonary arterial hypertension (C2973725);Reperfusion Injury (C0035126)	Systolic blood pressure (rs2048240);Systolic blood pressure (rs7562)
HOPX	H	Atrial Fibrillation (C0004238);Cardiac Arrhythmia (C0003811);Cardiomyopathy, Dilated (C0007193);Cardiomyopathy, Familial Idiopathic (C1449563);Cardiovascular Diseases (C0007222);Congestive heart failure (C0018802);Heart failure (C0018801);heart overload (C0684338);Hypertensive disease (C0020538)	NA
IFI16	H	Complete atrioventricular block (C0151517);CREST Syndrome (C0206138);SIMPSON-GOLABI-BEHMEL SYNDROME, TYPE 1 (C0796154)	NA
MAF	H	NA	NA
NR3C1	H	Acute Coronary Syndrome (C0948089);Aortic Valve Insufficiency (C0003504);Atrial Fibrillation (C0004238);Cardiovascular Diseases (C0007222);Carney Complex (C0406810);Complete atrioventricular block (C0151517);Congestive heart failure (C0018802);Coronary Arteriosclerosis (C0010054);Coronary Artery Disease (C1956346);Coronary heart disease (C0010068);Essential Hypertension (C0085580);familial atrial…	Atrial fibrillation (rs6580277)
PITX2	H	Abnormality of cardiovascular system morphology (C4049796);Atrial Fibrillation (C0004238);ATRIAL FIBRILLATION, FAMILIAL, 1 (disorder) (C1843687);ATRIAL SEPTAL DEFECT 1 (C1862389);Atrial Septal Defects (C0018817);Atrial tachycardia (C0546959);Atrioventricular Block (C0004245);Atrioventricular Septal Defect (C1389018);Cardiac Arrhythmia (C0003811);Cardiovascular Diseases (C0007222);Congenital Heart…	Atrial fibrillation (rs114904067);Atrial fibrillation (rs138311480);Atrial fibrillation (rs1532170);Atrial fibrillation (rs16997168);Atrial fibrillation (rs17042171);Atrial fibrillation (rs2129977);Atrial fibrillation (rs2220427);Atrial fibrillation (rs244017);Atrial fibrillation (rs2595104);Atrial fibrillation (rs2723334);Atrial fibrillation (rs3853445);Atrial fibrillation (rs61501369);Atrial fi…
PPARG	H	Acute Coronary Syndrome (C0948089);Acute myocardial infarction (C0155626);Acute myocardial ischemia (C0746731);Angina, Unstable (C0002965);Aortic Aneurysm (C0003486);Aortic aneurysm without mention of rupture NOS (C0340629);Aortic Valve Stenosis (C0003507);Arrhythmogenic Right Ventricular Dysplasia (C0349788);Atrial Fibrillation (C0004238);Atrial Premature Complexes (C0033036);Bradycardia (C04289…	Arterial stiffness index (rs17036160)
TBX3	H	Atrioventricular Block (C0004245);Cardiac Arrhythmia (C0003811);Conduction disorder of the heart (C0264886);Congenital Heart Defects (C0018798);Coronary heart disease (C0010068);DiGeorge Syndrome (C0012236);Holt-Oram syndrome (C0265264);Hypertensive disease (C0020538);Myocardial Infarction (C0027051);Paroxysmal atrial fibrillation (C0235480);Shprintzen syndrome (C0220704);Shprintzen-Goldberg synd…	Blood pressure (rs35444);Blood pressure (rs35444);Diastolic blood pressure (rs35444);Electrocardiogram morphology (amplitude at temporal datapoints) (rs11067264);Electrocardiogram morphology (amplitude at temporal datapoints) (rs142576422);Electrocardiogram morphology (amplitude at temporal datapoints) (rs188348223);Electrocardiogram morphology (amplitude at temporal datapoints) (rs7132327);Elect…
TCF21	H	Congenital heart disease (C0152021);Coronary Arteriosclerosis (C0010054);Coronary Artery Disease (C1956346);CORONARY ARTERY DISEASE, AUTOSOMAL DOMINANT, 1 (C1842247);Coronary heart disease (C0010068);Tetralogy of Fallot (C0039685);Ventricular Septal Defects (C0018818)	Coronary artery disease (myocardial infarction, percutaneous transluminal coronary angioplasty, coronary artery bypass grafting, angina or chromic ischemic heart disease) (rs12202017);Coronary artery disease (rs12190287);Coronary artery disease (rs12202017);Coronary artery disease (rs2327429);Coronary artery disease or ischemic stroke (rs12190287);Coronary artery disease or large artery stroke (r…
TRPS1	H	Abnormality of cardiovascular system morphology (C4049796);Coronary Arteriosclerosis (C0010054);Coronary Artery Disease (C1956346);Coronary heart disease (C0010068);Mitral Valve Prolapse Syndrome (C0026267)	NA
TSHZ3	H	NA	NA
ZFHX3	H	Atrial Fibrillation (C0004238);Cardiac Arrhythmia (C0003811);Coronary Arteriosclerosis (C0010054);Coronary Artery Disease (C1956346);Coronary heart disease (C0010068);familial atrial fibrillation (C3468561);Heart failure (C0018801);Paroxysmal atrial fibrillation (C0235480);Persistent atrial fibrillation (C2585653)	Atrial fibrillation (rs2106261);Atrial fibrillation (rs2359171);Atrial fibrillation (rs7193343);Atrial fibrillation (rs7197197);Atrial fibrillation (rs876727);Early onset atrial fibrillation (rs2106261);Incident atrial fibrillation (rs4499262);Prevalent atrial fibrillation (rs2106261)
MITF	I	Congestive heart failure (C0018802);CREST Syndrome (C0206138);Heart failure (C0018801);Myocardial Infarction (C0027051);Von Hippel-Lindau Syndrome (C0019562)	Coronary artery disease (rs12714757);Hypertrophic cardiomyopathy (sarcomere negative) (rs62253180);Myocardial infarction (rs17006419);QRS complex (12-leadsum) (rs13314892)
NKX2-5	I	Aneurysm of aortic arch (C0856748);Aneurysm of ascending aorta (C0856747);Aortic coarctation (C0003492);Aortic valve calcification (C0428791);Aortic Valve Disease 1 (C3887892);Aortic valve disorder (C1260873);Aortic Valve Insufficiency (C0003504);Aortic Valve Stenosis (C0003507);Ascending aortic dissection (C1836653);Atrial Fibrillation (C0004238);ATRIAL FIBRILLATION, FAMILIAL, 1 (disorder) (C184…	Atrial fibrillation (rs28439930);Atrial fibrillation (rs6882776);Atrial fibrillation (rs6891790);Electrocardiogram morphology (amplitude at temporal datapoints) (rs12652726);Heart rate (rs6882776);Resting heart rate (rs4868243)
AHR	J	Acute myocardial infarction (C0155626);Angina, Unstable (C0002965);Aortic Valve Insufficiency (C0003504);Cardiac Hypertrophy (C1383860);Cardiomegaly (C0018800);Cardiomyopathy, Familial Idiopathic (C1449563);Cardiovascular Diseases (C0007222);Congenital Heart Defects (C0018798);Congenital heart disease (C0152021);Coronary Arteriosclerosis (C0010054);Coronary Artery Disease (C1956346);Coronary hear…	NA
BCL11A	J	Cardiac Arrest (C0018790)	Heart rate response to exercise (rs12713404);Heart rate response to recovery post exercise (rs1372876);Heart rate response to recovery post exercise (rs2539671);Resting heart rate (rs12713404)
BHLHE41	J	Hypertensive disease (C0020538)	NA
EGR1	J	Acute Coronary Syndrome (C0948089);Acute myocardial infarction (C0155626);Aortic Aneurysm (C0003486);Aortic aneurysm without mention of rupture NOS (C0340629);Aortic Valve Insufficiency (C0003504);Cardiovascular Diseases (C0007222);Congenital heart disease (C0152021);Congestive heart failure (C0018802);Coronary Arteriosclerosis (C0010054);Coronary Artery Disease (C1956346);Coronary heart disease …	NA
ETS1	J	Congenital arteriovenous malformation (C0003857);Congenital heart disease (C0152021);Congestive heart failure (C0018802);Coronary Arteriosclerosis (C0010054);Coronary Artery Disease (C1956346);Coronary heart disease (C0010068);Heart Diseases (C0018799);Heart failure (C0018801);Hypertensive disease (C0020538);HYPOPLASTIC LEFT HEART SYNDROME 1 (C4551854);Reperfusion Injury (C0035126);Ventricular Se…	NA
ETS2	J	Congenital heart disease (C0152021);Coronary heart disease (C0010068)	NA
IRF2	J	Coronary Artery Disease (C1956346)	NA
JAZF1	J	Cardiac Sarcoma (C0238152);Coronary Arteriosclerosis (C0010054);Coronary heart disease (C0010068);Myocardial Ischemia (C0151744)	Systolic blood pressure (rs10274928);Systolic blood pressure (rs702814)
KLF9	J	Heart Failure, Diastolic (C1135196);Myocardial Infarction (C0027051)	NA
SKIL	J	Coronary Artery Disease (C1956346);Pulmonary arterial hypertension (C2973725)	NA
STAT4	J	Abnormal myocardium morphology (C4025758);Aortic Valve Insufficiency (C0003504);Cardiovascular Diseases (C0007222);Complete atrioventricular block (C0151517);Endocarditis (C0014118);Mitral Valve Insufficiency (C0026266);Myocardial Infarction (C0027051);Myocarditis (C0027059);Pericardial effusion (C0031039);Pericarditis (C0031046);Pulmonary Embolism (C0034065)	NA
ZMAT4	J	NA	NA
ASH1L	K	NA	NA
BHLHE40	K	acute aortic dissection (C0241868);Brugada Syndrome (disorder) (C1142166);Myocardial Infarction (C0027051);Myocardial Ischemia (C0151744)	NA
CASZ1	K	Acute myocardial infarction (C0155626);Atrial Fibrillation (C0004238);Cardiomyopathies, Primary (C0033141);Cardiomyopathy, Dilated (C0007193);Cardiomyopathy, Familial Idiopathic (C1449563);Cardiovascular Diseases (C0007222);Congenital heart disease (C0152021);Congestive heart failure (C0018802);Coronary Artery Disease (C1956346);Coronary heart disease (C0010068);Essential Hypertension (C0085580);…	Atrial fibrillation (rs284277);Atrial fibrillation (rs880315);Blood pressure (rs880315);Blood pressure (rs880315);Diastolic blood pressure (cigarette smoking interaction) (rs880315);Diastolic blood pressure (rs880315);Diastolic blood pressure x alcohol consumption (light vs heavy) interaction (2df test) (rs17035646);Diastolic blood pressure x alcohol consumption interaction (2df test) (rs34071855…
ETV1	K	Atrial dilatation (C0264734);Atrial Fibrillation (C0004238);Cardiac Arrhythmia (C0003811)	Coronary artery disease (rs2073533);Coronary atherosclerosis (time to event) (rs2073532)
HIF3A	K	NA	NA
IRX4	K	Cardiomyopathies (C0878544);Cardiovascular Diseases (C0007222);Congenital heart disease (C0152021);Coronary heart disease (C0010068);Ventricular Septal Defects (C0018818)	Cardiovascular disease risk factors (rs4975709);Electrocardiogram morphology (amplitude at temporal datapoints) (rs260399)
JUNB	K	Aortic Valve Insufficiency (C0003504);Aortic Valve Stenosis (C0003507);Bicuspid aortic valve (C0149630);Cardiovascular Diseases (C0007222);Dilatation of aorta (C0265004);Hypertensive disease (C0020538);Myocardial Ischemia (C0151744)	NA
KDM4C	K	ATRIAL SEPTAL DEFECT 1 (C1862389);Atrial Septal Defects (C0018817)	NA
NFIC	K	Microphthalmia, syndromic 2 (C1846265)	NA
PRDM16	K	Abnormal heart valve morphology (C0241654);Aneurysm of aortic arch (C0856748);Cardiomyopathies (C0878544);Cardiomyopathy, Dilated (C0007193);Cardiomyopathy, Familial Idiopathic (C1449563);Cardiovascular Diseases (C0007222);Congestive heart failure (C0018802);Coronary Artery Disease (C1956346);Familial dilated cardiomyopathy (C0340427);Heart failure (C0018801);Heart Septal Defects (C0018816);Left …	Cardiovascular disease in type 2 diabetes (rs12735779);Coronary artery disease (rs2493298);Diastolic blood pressure (rs2493292);Electrocardiogram morphology (amplitude at temporal datapoints) (rs60965469);Hypertension (rs2493292);Mean arterial pressure (rs2493292);Myocardial infarction (rs10797376);QRS duration (rs2483280);Systolic blood pressure (rs2493292)
SCAPER	K	NA	NA
STAT3	K	Acute Coronary Syndrome (C0948089);Acute heart failure (C0264714);Acute myocardial infarction (C0155626);Aortic Aneurysm (C0003486);Aortic aneurysm without mention of rupture NOS (C0340629);Aortic valve calcification (C0428791);Aortic Valve Insufficiency (C0003504);Arterial aneurysm (C0340613);Atrial Fibrillation (C0004238);Cardiac Arrest (C0018790);Cardiac Hypertrophy (C1383860);Cardiomegaly (C0…	Diastolic blood pressure (rs34846688)
TSC22D3	K	Cardiovascular Diseases (C0007222);Myocardial Infarction (C0027051)	NA
ZBTB20	K	NA	Postoperative atrial fibrillation after cardiac surgery (rs115155878);Systolic blood pressure (rs1882289)
ZFP36L1	K	NA	Diastolic blood pressure (rs57786342)
ZMAT3	K	NA	NA
ZNF25	K	NA	NA
ZNF385B	K	Cardiovascular Diseases (C0007222);Sudden Cardiac Arrest (C1720824);Sudden Cardiac Death (C0085298)	Pulse pressure (rs1486236);Sudden cardiac arrest (rs16866933)
ZNF436	K	Williams Syndrome (C0175702)	NA
ARID5B	L	Cardiovascular Diseases (C0007222);Coronary Arteriosclerosis (C0010054);Coronary Artery Disease (C1956346);Coronary heart disease (C0010068)	NA
IRF9	L	Viral myocarditis (C0276138)	NA
JUN	L	Acute myocardial infarction (C0155626);Aortic Valve Insufficiency (C0003504);Aortic Valve Stenosis (C0003507);Bicuspid aortic valve (C0149630);Cardiovascular Diseases (C0007222);Dilatation of aorta (C0265004);Hypertensive disease (C0020538);Reperfusion Injury (C0035126)	NA
MYRF	L	Atrial Septal Defects (C0018817);Bland White Garland Syndrome (C1735886);Congenital atresia of mitral valve (C0344760);Dextrocardia (C0011813);Hypoplastic Left Heart Syndrome (C0152101);Muscular ventricular septum defect (C0685707);Patent ductus arteriosus (C0013274);Scimitar Syndrome (C0036400);Tetralogy of Fallot (C0039685);Total Anomalous Pulmonary Venous Return 1 (C4551904);Ventricular Septal…	Electrocardiographic traits (multivariate) (rs174537);Systolic blood pressure (rs11230796)
NFIA	L	NA	Electrocardiogram morphology (amplitude at temporal datapoints) (rs2474370);Electrocardiographic conduction measures (rs2207790);Electrocardiographic traits (multivariate) (rs12142600);PR interval (rs6587924);QRS duration (rs2207790);QRS duration (rs2207791);QRS duration (rs6587924)
NFIB	L	NA	Coronary artery disease (rs10121140)
PLAGL1	L	Cardiomegaly (C0018800);Complete atrioventricular block (C0151517);Congenital Heart Defects (C0018798);Coronary heart disease (C0010068);Patent ductus arteriosus (C0013274);Ventricular Septal Defects (C0018818)	NA
SOX6	L	Acute myocardial infarction (C0155626);Cardiovascular Diseases (C0007222);Coronary Artery Disease (C1956346)	Blood pressure (rs1401454);Blood pressure (rs1401454);Coronary artery disease (rs34156428);Diastolic blood pressure (cigarette smoking interaction) (rs2014408);Diastolic blood pressure (rs146669915);Diastolic blood pressure (rs4757391);Diastolic blood pressure x alcohol consumption interaction (2df test) (rs12799126);Diastolic blood pressure x alcohol consumption interaction (2df test) (rs7118275…
TBX18	L	Complete atrioventricular block (C0151517);Congenital Heart Defects (C0018798);Coronary heart disease (C0010068);Pacing-induced cardiomyopathy (C3532227);Sick Sinus Syndrome (C0037052);Ventricular Fibrillation (C0042510);Ventricular Septal Defects (C0018818)	Pulse pressure (rs60255247)
TBX5	L	Acute myocardial infarction (C0155626);Aortic coarctation (C0003492);Atrial Fibrillation (C0004238);ATRIAL SEPTAL DEFECT 1 (C1862389);Atrial Septal Defects (C0018817);Atrioventricular Block (C0004245);ATRIOVENTRICULAR CANAL DEFECT (C1389016);Atrioventricular Septal Defect (C1389018);AV Block First Degree by ECG Finding (C3715208);Brugada Syndrome (disorder) (C1142166);Cardiac Arrhythmia (C0003811…	Atrial fibrillation (rs2384407);Atrial fibrillation (rs883079);Brugada syndrome (rs883079);Electrocardiogram morphology (amplitude at temporal datapoints) (rs61931005);Electrocardiogram morphology (amplitude at temporal datapoints) (rs883079);Electrocardiographic traits (multivariate) (rs883079);Electrocardiographic traits (rs3825214);Electrocardiographic traits (rs3825214);Electrocardiographic t…
WT1	L	Abnormality of cardiovascular system morphology (C4049796);Aortic coarctation (C0003492);Aortic Valve Stenosis (C0003507);Atrial Septal Defects (C0018817);Hypertensive disease (C0020538);Hypoplastic Left Heart Syndrome (C0152101);Myocardial Infarction (C0027051);Patent ductus arteriosus (C0013274);PATENT DUCTUS ARTERIOSUS 1 (C4282128);Post MI (C0856742);Pulmonary Venous Return Anomaly (C4551905);…	Brugada syndrome (rs72905083);Coronary artery disease (rs7115190);Electrocardiogram morphology (amplitude at temporal datapoints) (rs7118294);PR interval (rs11031737);Pulse pressure (rs4922591)

## Sheet: Supplementary Table S4
TF_Source	TF_Target	Interaction_type	Correlation_Mean	Lag_Mean	Correlation_hiPSC-A	Lag_hiPSC-A	Correlation_hiPSC-B	Lag_hiPSC-B	Correlation_hiPSC-C	Lag_hiPSC-C
AHR	ARID5B	Activation	0.635506	3	0.635506	3	NA	NA	NA	NA
AHR	BCL11A	Activation	0.704578	3	0.721676	3	0.68748	3	NA	NA
AHR	CREB5	Activation	0.666613	1	0.666613	1	NA	NA	NA	NA
AHR	ETV1	Activation	0.65895	2	0.65895	2	NA	NA	NA	NA
AHR	HES6	Activation	0.676327	3	0.676327	3	NA	NA	NA	NA
AHR	IRF9	Activation	0.715989	3	0.715989	3	NA	NA	NA	NA
AHR	KDM4C	Activation	0.668792	2	0.668792	2	NA	NA	NA	NA
AHR	KLF9	Activation	0.645301	1	0.645301	1	NA	NA	NA	NA
AHR	NFIB	Activation	0.644102	3	0.644102	3	NA	NA	NA	NA
AHR	NR3C1	Activation	0.694863	3	0.685104	3	0.704623	3	NA	NA
AHR	SKIL	Activation	0.652952	3	0.652952	3	NA	NA	NA	NA
AHR	TCF25	Activation	0.671265	3	0.671265	3	NA	NA	NA	NA
AHR	TRPS1	Activation	0.641907	1	0.641907	1	NA	NA	NA	NA
AHR	WT1	Activation	0.630315	2	0.630315	2	NA	NA	NA	NA
AHR	ZBTB20	Activation	0.647347	1	0.647347	1	NA	NA	NA	NA
AHR	ZMAT3	Activation	0.632882	2	0.632882	2	NA	NA	NA	NA
ARID5B	ASH1L	Activation	0.867698	2.5	0.877527	3	NA	NA	0.857868	2
ARID5B	BCL11A	Activation	0.744297	3	0.676782	3	0.742981	3	0.813129	3
ARID5B	BHLHE40	Activation	0.823615	3	0.815089	3	0.925516	3	0.730242	3
ARID5B	BHLHE41	Activation	0.830537	3	0.830537	3	NA	NA	NA	NA
ARID5B	CAMTA2	Activation	0.724769	1.66667	0.71561	1	0.783972	3	0.674725	1
ARID5B	CASZ1	Activation	0.887713	2	0.894648	3	NA	NA	0.880778	1
ARID5B	CDX2	Inhibition	-0.666624	3	-0.680502	3	NA	NA	-0.652746	3
ARID5B	E2F7	Inhibition	-0.809326	2	-0.809326	2	NA	NA	NA	NA
ARID5B	EGR1	Activation	0.752284	3	0.753128	3	0.751441	3	NA	NA
ARID5B	EOMES	Inhibition	-0.710811	2	-0.756571	2	NA	NA	-0.665051	2
ARID5B	ESRRG	Activation	0.87245	2	0.872366	3	NA	NA	0.872533	1
ARID5B	ETS2	Activation	0.811927	3	0.84807	3	0.707653	3	0.880058	3
ARID5B	ETV1	Activation	0.696497	3	0.696497	3	NA	NA	NA	NA
ARID5B	EVX1	Inhibition	-0.692316	3	-0.655586	3	NA	NA	-0.729045	3
ARID5B	FOXA3	Inhibition	-0.902179	1	-0.902179	1	NA	NA	NA	NA
ARID5B	FOXH1	Inhibition	-0.843416	2.5	-0.825828	2	NA	NA	-0.861003	3
ARID5B	FOXM1	Inhibition	-0.89155	2.5	-0.867477	3	NA	NA	-0.915623	2
ARID5B	GATA3	Inhibition	-0.766738	3	-0.751472	3	-0.697391	3	-0.851351	3
ARID5B	HIF3A	Activation	0.883392	2.66667	0.835121	3	0.919676	3	0.89538	2
ARID5B	HMGA1	Inhibition	-0.936656	3	-0.913844	3	NA	NA	-0.959467	3
ARID5B	HOPX	Activation	0.668426	3	0.668426	3	NA	NA	NA	NA
ARID5B	HOXA1	Inhibition	-0.793682	3	-0.833805	3	-0.67685	3	-0.87039	3
ARID5B	ID1	Inhibition	-0.751394	3	-0.763488	3	NA	NA	-0.7393	3
ARID5B	ID3	Inhibition	-0.861082	3	-0.8767	3	-0.812932	3	-0.893615	3
ARID5B	IRF2	Activation	0.859723	3	0.816489	3	0.877547	3	0.885132	3
ARID5B	IRX4	Activation	0.881615	1.66667	0.838691	3	0.891792	1	0.914362	1
ARID5B	JAZF1	Activation	0.846151	3	0.835944	3	NA	NA	0.856358	3
ARID5B	JUN	Activation	0.904474	2	0.918466	1	0.890483	3	NA	NA
ARID5B	KDM4C	Activation	0.856884	3	0.882632	3	0.881682	3	0.806338	3
ARID5B	LEF1	Inhibition	-0.797746	3	-0.768402	3	-0.761863	3	-0.862973	3
ARID5B	LHX1	Inhibition	-0.819276	2.5	-0.818304	2	NA	NA	-0.820247	3
ARID5B	MEF2A	Activation	0.888952	1	0.891555	1	NA	NA	0.886349	1
ARID5B	MIS18BP1	Inhibition	-0.910564	3	-0.910564	3	NA	NA	NA	NA
ARID5B	MSX1	Inhibition	-0.790941	3	-0.751111	3	-0.733329	3	-0.888382	3
ARID5B	MYBL2	Inhibition	-0.932919	2.5	-0.928598	3	NA	NA	-0.937241	2
ARID5B	MYCL	Inhibition	-0.859854	2.5	-0.869437	3	-0.850272	2	NA	NA
ARID5B	NFATC2	Activation	0.785864	3	0.785864	3	NA	NA	NA	NA
ARID5B	NFIA	Activation	0.930666	3	0.916083	3	NA	NA	0.94525	3
ARID5B	NKX2-5	Activation	0.833504	1	0.833504	1	NA	NA	NA	NA
ARID5B	NR3C1	Activation	0.814465	2.5	0.841944	3	0.786986	2	NA	NA
ARID5B	NR6A1	Inhibition	-0.950289	2.5	-0.95033	3	NA	NA	-0.950248	2
ARID5B	OVOL2	Inhibition	-0.736621	2.5	-0.79789	3	-0.675351	2	NA	NA
ARID5B	POU2F3	Inhibition	-0.758441	1	-0.758441	1	NA	NA	NA	NA
ARID5B	PRDM1	Inhibition	-0.763152	2.66667	-0.80017	3	-0.691548	2	-0.797739	3
ARID5B	PRDM16	Activation	0.870914	2.33333	0.824393	3	0.926784	2	0.861564	2
ARID5B	RARG	Inhibition	-0.649968	3	-0.649968	3	NA	NA	NA	NA
ARID5B	SALL1	Inhibition	-0.860539	3	-0.825625	3	NA	NA	-0.895452	3
ARID5B	SALL2	Inhibition	-0.875921	2.33333	-0.896166	3	-0.836388	1	-0.895207	3
ARID5B	SALL3	Inhibition	-0.734484	1	-0.732508	1	NA	NA	-0.73646	1
ARID5B	SALL4	Inhibition	-0.940732	3	-0.935398	3	NA	NA	-0.946065	3
ARID5B	SP5	Inhibition	-0.751227	2	-0.732247	2	NA	NA	-0.770208	2
ARID5B	SP6	Inhibition	-0.774475	3	-0.782223	3	NA	NA	-0.766728	3
ARID5B	SRY	Inhibition	-0.777192	1	-0.777192	1	NA	NA	NA	NA
ARID5B	STAT3	Activation	0.863376	3	0.835698	3	0.871123	3	0.883306	3
ARID5B	STAT4	Activation	0.784617	2.5	0.784002	3	NA	NA	0.785231	2
ARID5B	TFAP2C	Inhibition	-0.77198	3	-0.77198	3	NA	NA	NA	NA
ARID5B	TGIF1	Inhibition	-0.902227	3	-0.879181	3	NA	NA	-0.925273	3
ARID5B	TP53	Inhibition	-0.803821	3	-0.803821	3	NA	NA	NA	NA
ARID5B	VENTX	Inhibition	-0.674741	3	-0.674741	3	NA	NA	NA	NA
ARID5B	WDHD1	Inhibition	-0.912376	3	-0.912376	3	NA	NA	NA	NA
ARID5B	ZFP36L1	Activation	0.935353	1.5	0.950366	2	NA	NA	0.92034	1
ARID5B	ZMAT3	Activation	0.834778	2.5	0.877511	3	NA	NA	0.792046	2
ARID5B	ZNF124	Inhibition	-0.811254	3	-0.763267	3	-0.887113	3	-0.783382	3
ARID5B	ZNF215	Inhibition	-0.88111	2	-0.88111	2	NA	NA	NA	NA
ARID5B	ZNF25	Activation	0.810454	2.33333	0.828744	3	0.855185	3	0.747432	1
ARID5B	ZNF273	Inhibition	-0.911603	1	-0.911603	1	NA	NA	NA	NA
ARID5B	ZNF385B	Activation	0.802095	2	0.846483	3	NA	NA	0.757706	1
ARID5B	ZNF436	Activation	0.891518	2	0.840014	3	NA	NA	0.943023	1
ARID5B	ZNF611	Inhibition	-0.708818	3	-0.817437	3	-0.658118	3	-0.650898	3
ARID5B	ZNF704	Activation	0.860481	1	0.860481	1	NA	NA	NA	NA
ARID5B	ZNF730	Inhibition	-0.880602	3	-0.889409	3	NA	NA	-0.871796	3
ARID5B	ZNF90	Inhibition	-0.886476	3	-0.886476	3	NA	NA	NA	NA
ASH1L	BHLHE40	Activation	0.825116	2.33333	0.836826	3	0.928035	3	0.710486	1
ASH1L	BHLHE41	Activation	0.80644	3	0.80644	3	NA	NA	NA	NA
ASH1L	CASZ1	Activation	0.896512	1	0.896512	1	NA	NA	NA	NA
ASH1L	CEBPD	Activation	0.838353	2	0.88712	3	0.855674	2	0.772263	1
ASH1L	EGR1	Activation	0.775703	3	0.828547	3	0.722859	3	NA	NA
ASH1L	EOMES	Inhibition	-0.661218	2	-0.661218	2	NA	NA	NA	NA
ASH1L	ESRRG	Activation	0.865162	1	0.865162	1	NA	NA	NA	NA
ASH1L	ETS1	Activation	0.708208	2.5	0.650685	3	NA	NA	0.765731	2
ASH1L	ETS2	Activation	0.762412	3	0.807095	3	0.717728	3	NA	NA
ASH1L	FOXA3	Inhibition	-0.831319	1.5	-0.904625	1	NA	NA	-0.758014	2
ASH1L	FOXH1	Inhibition	-0.811258	2.5	-0.859244	2	NA	NA	-0.763273	3
ASH1L	GATA3	Inhibition	-0.746345	3	-0.748807	3	-0.75095	3	-0.739278	3
ASH1L	GRHL2	Inhibition	-0.664083	1	-0.664083	1	NA	NA	NA	NA
ASH1L	HMGA1	Inhibition	-0.895439	1.5	-0.940739	1	NA	NA	-0.850139	2
ASH1L	HOXA1	Inhibition	-0.732267	3	-0.731244	3	-0.762594	3	-0.702964	3
ASH1L	ID1	Inhibition	-0.702627	2.66667	-0.663427	3	-0.674924	3	-0.769529	2
ASH1L	ID3	Inhibition	-0.838835	3	-0.796447	3	-0.887313	3	-0.832746	3
ASH1L	IRF2	Activation	0.868263	3	0.860989	3	0.875538	3	NA	NA
ASH1L	IRX4	Activation	0.864762	1	0.86336	1	0.866165	1	NA	NA
ASH1L	JAZF1	Activation	0.76954	2.66667	0.781627	2	0.700761	3	0.826232	3
ASH1L	JUNB	Activation	0.819507	2.66667	0.719112	3	0.886463	3	0.852946	2
ASH1L	KDM4C	Activation	0.777569	2.66667	0.799204	3	0.892755	3	0.640746	2
ASH1L	LEF1	Inhibition	-0.776427	3	-0.762572	3	-0.847716	3	-0.718993	3
ASH1L	LHX1	Inhibition	-0.790979	2	-0.790979	2	NA	NA	NA	NA
ASH1L	MIS18BP1	Inhibition	-0.778916	1	-0.84334	1	NA	NA	-0.714492	1
ASH1L	MITF	Activation	0.8476	1	0.8476	1	NA	NA	NA	NA
ASH1L	MSX1	Inhibition	-0.720102	2.66667	-0.734868	3	-0.685267	3	-0.740172	2
ASH1L	MYCL	Inhibition	-0.806383	2	-0.828761	3	-0.817908	1	-0.772481	2
ASH1L	MYCN	Inhibition	-0.660984	2	-0.63187	3	NA	NA	-0.690098	1
ASH1L	NFIB	Activation	0.88216	1.66667	0.903268	2	0.904436	2	0.838776	1
ASH1L	NKX2-5	Activation	0.855832	1	0.855832	1	NA	NA	NA	NA
ASH1L	NR3C1	Activation	0.787968	3	0.826876	3	0.74906	3	NA	NA
ASH1L	NR6A1	Inhibition	-0.927086	1	-0.927086	1	NA	NA	NA	NA
ASH1L	PITX2	Activation	0.690377	3	0.690377	3	NA	NA	NA	NA
ASH1L	PLAGL1	Activation	0.821066	2.5	0.80522	3	0.836912	2	NA	NA
ASH1L	PRDM1	Inhibition	-0.706166	3	-0.673085	3	-0.760422	3	-0.684992	3
ASH1L	SALL1	Inhibition	-0.810187	2.33333	-0.770153	3	-0.86824	3	-0.792169	1
ASH1L	SALL3	Inhibition	-0.688363	1	-0.691006	1	-0.685721	1	NA	NA
ASH1L	SALL4	Inhibition	-0.886589	1	-0.932746	1	NA	NA	-0.840431	1
ASH1L	SP5	Inhibition	-0.675973	1	-0.675973	1	NA	NA	NA	NA
ASH1L	SP6	Inhibition	-0.701223	3	-0.743581	3	-0.658864	3	NA	NA
ASH1L	STAT3	Activation	0.87655	3	0.867053	3	0.923026	3	0.839571	3
ASH1L	TBX18	Activation	0.866202	2	0.831816	1	0.900588	3	NA	NA
ASH1L	TFAP2C	Inhibition	-0.692236	2.5	-0.695701	2	NA	NA	-0.688772	3
ASH1L	TP53	Inhibition	-0.775966	1	-0.775966	1	NA	NA	NA	NA
ASH1L	TSC22D3	Activation	0.799861	2	0.784698	1	NA	NA	0.815024	3
ASH1L	WDHD1	Inhibition	-0.900852	1	-0.900852	1	NA	NA	NA	NA
ASH1L	ZIC3	Inhibition	-0.759523	1	-0.827944	1	NA	NA	-0.691102	1
ASH1L	ZNF124	Inhibition	-0.813812	2.66667	-0.806141	3	-0.88951	2	-0.745785	3
ASH1L	ZNF25	Activation	0.804805	2.33333	0.821529	3	0.845895	2	0.746991	2
ASH1L	ZNF273	Inhibition	-0.817653	1	-0.817653	1	NA	NA	NA	NA
ASH1L	ZNF428	Activation	0.827089	1	0.827089	1	NA	NA	NA	NA
ASH1L	ZNF611	Inhibition	-0.79568	3	-0.806872	3	-0.784487	3	NA	NA
ASH1L	ZNF724	Inhibition	-0.762236	2	-0.782209	1	NA	NA	-0.742264	3
ASH1L	ZNF730	Inhibition	-0.824603	2	-0.855201	1	NA	NA	-0.794006	3
ASH1L	ZNF90	Inhibition	-0.791267	1	-0.839185	1	NA	NA	-0.743349	1
ATOH8	RARG	Inhibition	-0.675647	3	-0.675647	3	NA	NA	NA	NA
BCL11A	HAND1	Inhibition	-0.671223	2.5	-0.638588	2	NA	NA	-0.703858	3
BCL11A	ID1	Inhibition	-0.71956	1.5	-0.634724	1	NA	NA	-0.804396	2
BCL11A	MSX2	Inhibition	-0.707075	2.33333	-0.663525	2	-0.670086	3	-0.787615	2
BCL11A	PRRX1	Inhibition	-0.710772	2.5	-0.638875	3	NA	NA	-0.78267	2
BCL11A	TOX3	Inhibition	-0.643753	3	-0.643753	3	NA	NA	NA	NA
BCL11A	ZBTB16	Inhibition	-0.776052	3	-0.776052	3	NA	NA	NA	NA
BCL11A	ZNF124	Inhibition	-0.676222	2	-0.648987	2	NA	NA	-0.703456	2
BCL11A	ZNF25	Activation	0.721243	2	0.721243	2	NA	NA	NA	NA
BHLHE40	ASH1L	Activation	0.736423	2	0.816129	2	NA	NA	0.656717	2
BHLHE40	CREB5	Activation	0.685189	1	0.65991	1	0.710467	1	NA	NA
BHLHE40	EGR1	Activation	0.762496	2	0.746922	1	0.778071	3	NA	NA
BHLHE40	ETS2	Activation	0.681381	2.5	0.710262	2	0.652499	3	NA	NA
BHLHE40	GATA3	Inhibition	-0.730282	3	-0.767392	3	-0.693171	3	NA	NA
BHLHE40	GRHL2	Inhibition	-0.700585	2	-0.702086	1	-0.699083	3	NA	NA
BHLHE40	HAND1	Inhibition	-0.675295	3	-0.698978	3	-0.651611	3	NA	NA
BHLHE40	HOPX	Activation	0.719363	2.5	0.743534	3	NA	NA	0.695192	2
BHLHE40	ID3	Inhibition	-0.717719	3	-0.719185	3	-0.770861	3	-0.663111	3
BHLHE40	IRF2	Activation	0.804897	1.66667	0.83411	1	0.831384	3	0.749196	1
BHLHE40	IRF9	Activation	0.782873	2	0.632108	1	0.922595	3	0.793915	2
BHLHE40	JAZF1	Activation	0.752904	1	0.801063	1	NA	NA	0.704746	1
BHLHE40	JUN	Activation	0.764992	1.5	0.688648	2	0.841336	1	NA	NA
BHLHE40	JUNB	Activation	0.788021	1.66667	0.74753	3	0.876851	1	0.739683	1
BHLHE40	LEF1	Inhibition	-0.66705	3	-0.677406	3	NA	NA	-0.656694	3
BHLHE40	MSX1	Inhibition	-0.662247	3	-0.662247	3	NA	NA	NA	NA
BHLHE40	MSX2	Inhibition	-0.697716	3	-0.720579	3	NA	NA	-0.674853	3
BHLHE40	MXD1	Activation	0.700994	2	0.710932	3	0.691057	1	NA	NA
BHLHE40	NFIC	Activation	0.821762	2	0.887069	3	0.756454	1	NA	NA
BHLHE40	NR3C1	Activation	0.836644	1	0.836644	1	NA	NA	NA	NA
BHLHE40	SALL2	Inhibition	-0.764986	3	-0.764986	3	NA	NA	NA	NA
BHLHE40	SCAPER	Activation	0.73794	1	0.732621	1	0.743259	1	NA	NA
BHLHE40	SP6	Inhibition	-0.665666	3	-0.665666	3	NA	NA	NA	NA
BHLHE40	STAT3	Activation	0.841362	1	0.900601	1	NA	NA	0.782122	1
BHLHE40	TCF25	Activation	0.738509	2	0.738509	2	NA	NA	NA	NA
BHLHE40	TFAP2C	Inhibition	-0.766284	1	-0.766284	1	NA	NA	NA	NA
BHLHE40	TP53	Inhibition	-0.693061	3	-0.693061	3	NA	NA	NA	NA
BHLHE40	ZEB1	Activation	0.735126	3	0.765672	3	0.70458	3	NA	NA
BHLHE40	ZNF124	Inhibition	-0.792941	2.5	-0.851941	2	NA	NA	-0.733942	3
BHLHE40	ZNF25	Activation	0.822371	1	0.822515	1	NA	NA	0.822226	1
BHLHE40	ZNF385B	Activation	0.800014	1	0.800014	1	NA	NA	NA	NA
BHLHE40	ZNF611	Inhibition	-0.731162	3	-0.731162	3	NA	NA	NA	NA
BHLHE41	FOXA3	Inhibition	-0.632744	1	-0.632744	1	NA	NA	NA	NA
BHLHE41	GATA3	Inhibition	-0.729892	1	-0.729892	1	NA	NA	NA	NA
BHLHE41	HAND1	Inhibition	-0.693985	1.5	-0.641319	2	-0.74665	1	NA	NA
BHLHE41	HOPX	Activation	0.737279	3	0.737279	3	NA	NA	NA	NA
BHLHE41	IFI16	Activation	0.636816	3	0.636816	3	NA	NA	NA	NA
BHLHE41	JAZF1	Activation	0.777039	1	0.777039	1	NA	NA	NA	NA
BHLHE41	JUNB	Activation	0.677513	2	0.677513	2	NA	NA	NA	NA
BHLHE41	MSX1	Inhibition	-0.657922	1	-0.657922	1	NA	NA	NA	NA
BHLHE41	MSX2	Inhibition	-0.671424	3	-0.671424	3	NA	NA	NA	NA
BHLHE41	NFIC	Activation	0.783351	3	0.783351	3	NA	NA	NA	NA
BHLHE41	NR3C1	Activation	0.751885	1	0.751885	1	NA	NA	NA	NA
BHLHE41	STAT3	Activation	0.806951	1	0.806951	1	NA	NA	NA	NA
BHLHE41	STAT4	Activation	0.699361	1	0.699361	1	NA	NA	NA	NA
BHLHE41	TFAP2C	Inhibition	-0.702558	1	-0.702558	1	NA	NA	NA	NA
BHLHE41	TOX3	Inhibition	-0.654818	3	-0.654818	3	NA	NA	NA	NA
BHLHE41	ZNF611	Inhibition	-0.705304	1	-0.705304	1	NA	NA	NA	NA
BMP2	ARID5B	Activation	0.665722	2	0.648368	3	NA	NA	0.683075	1
BMP2	ASH1L	Activation	0.731187	2	0.731187	2	NA	NA	NA	NA
BMP2	BHLHE41	Activation	0.660809	3	0.660809	3	NA	NA	NA	NA
BMP2	BNC1	Activation	0.728679	1.66667	0.637177	1	0.692103	3	0.856756	1
BMP2	CAMTA2	Activation	0.725445	1.5	0.74605	2	NA	NA	0.704841	1
BMP2	CARHSP1	Inhibition	-0.814634	2.5	-0.771962	2	-0.857305	3	NA	NA
BMP2	CASZ1	Activation	0.728706	3	0.7484	3	0.705168	3	0.732551	3
BMP2	CDX2	Inhibition	-0.776523	3	-0.794074	3	NA	NA	-0.758972	3
BMP2	CREB5	Activation	0.728197	3	0.728197	3	NA	NA	NA	NA
BMP2	DACH1	Activation	0.81361	2	0.775555	2	0.779209	2	0.886067	2
BMP2	EGR1	Activation	0.654918	2	0.654918	2	NA	NA	NA	NA
BMP2	EOMES	Inhibition	-0.828393	2.33333	-0.781063	2	-0.819932	3	-0.884185	2
BMP2	EPAS1	Activation	0.702232	3	0.702232	3	NA	NA	NA	NA
BMP2	ESRRG	Activation	0.802488	2.66667	0.820409	2	0.7427	3	0.844356	3
BMP2	ETV4	Inhibition	-0.868981	1	-0.812109	1	NA	NA	-0.925853	1
BMP2	EVX1	Inhibition	-0.731475	3	-0.747771	3	-0.685978	3	-0.760678	3
BMP2	FOXA3	Inhibition	-0.724303	3	-0.718701	3	NA	NA	-0.729906	3
BMP2	FOXH1	Inhibition	-0.656882	2.5	-0.64888	2	NA	NA	-0.664885	3
BMP2	FOXM1	Inhibition	-0.670622	2.66667	-0.668372	2	-0.658908	3	-0.684584	3
BMP2	FOXP1	Activation	0.823778	2.33333	0.807534	2	0.773539	3	0.89026	2
BMP2	GATA5	Activation	0.772749	1	0.685046	1	0.860453	1	NA	NA
BMP2	GSC	Inhibition	-0.737566	2.33333	-0.635608	2	-0.802448	2	-0.774642	3
BMP2	HAND2	Activation	0.858592	2.33333	0.844006	2	0.82078	3	0.910991	2
BMP2	HIF3A	Activation	0.708485	1	0.708485	1	NA	NA	NA	NA
BMP2	HMBOX1	Activation	0.773364	2.66667	0.779606	2	0.768708	3	0.771778	3
BMP2	HMGA1	Inhibition	-0.7086	2	-0.718166	1	NA	NA	-0.699034	3
BMP2	HOXA1	Inhibition	-0.746833	3	-0.716269	3	NA	NA	-0.777398	3
BMP2	HOXB3	Activation	0.713006	1.5	0.702706	1	0.723305	2	NA	NA
BMP2	ID3	Inhibition	-0.672891	3	-0.694675	3	NA	NA	-0.651107	3
BMP2	IRX4	Activation	0.686917	2	0.686917	2	NA	NA	NA	NA
BMP2	JUN	Activation	0.734158	1.5	0.708003	2	NA	NA	0.760312	1
BMP2	KDM4C	Activation	0.66972	3	0.665259	3	NA	NA	0.674181	3
BMP2	LEF1	Inhibition	-0.6891	3	-0.6891	3	NA	NA	NA	NA
BMP2	LHX1	Inhibition	-0.840217	3	-0.857198	3	-0.805556	3	-0.857897	3
BMP2	MAF	Activation	0.71496	2.66667	0.632802	2	0.775182	3	0.736897	3
BMP2	MECOM	Activation	0.755306	2	0.637956	1	0.812943	3	0.815017	2
BMP2	MEF2A	Activation	0.795554	2.66667	0.734083	3	0.820514	3	0.832065	2
BMP2	MEF2C	Activation	0.85102	2.33333	0.811847	2	0.828659	3	0.912555	2
BMP2	MEIS2	Activation	0.771322	1	0.824161	1	0.718483	1	NA	NA
BMP2	MESP2	Inhibition	-0.817391	3	-0.797639	3	-0.880986	3	-0.773549	3
BMP2	MIS18BP1	Inhibition	-0.799832	2.66667	-0.780438	2	-0.811586	3	-0.807471	3
BMP2	MITF	Activation	0.778637	2.66667	0.79555	2	0.73347	3	0.80689	3
BMP2	MYBL2	Inhibition	-0.718936	2	-0.740787	1	-0.716756	3	-0.699265	2
BMP2	MYCN	Inhibition	-0.723385	3	-0.698323	3	-0.653803	3	-0.818028	3
BMP2	MYRF	Activation	0.770717	2	0.659149	2	0.866387	2	0.786616	2
BMP2	NFIA	Activation	0.675368	3	0.682859	3	NA	NA	0.667877	3
BMP2	NFIB	Activation	0.655382	3	0.655382	3	NA	NA	NA	NA
BMP2	NKX2-5	Activation	0.844259	2	0.792777	1	0.850602	3	0.889399	2
BMP2	NR6A1	Inhibition	-0.681812	3	-0.715207	3	NA	NA	-0.648416	3
BMP2	OTX2	Inhibition	-0.752193	2	-0.785032	2	-0.652753	3	-0.818794	1
BMP2	OVOL2	Inhibition	-0.696719	1.33333	-0.701015	1	-0.683342	1	-0.705799	2
BMP2	PBX1	Activation	0.782982	2	0.703235	2	NA	NA	0.86273	2
BMP2	PITX2	Activation	0.700749	3	0.683455	3	NA	NA	0.718042	3
BMP2	POU2F3	Inhibition	-0.749826	1	-0.758656	1	-0.709393	1	-0.781429	1
BMP2	POU5F1	Inhibition	-0.843482	1	-0.749452	1	-0.86616	1	-0.914834	1
BMP2	PPARG	Activation	0.630133	2	0.630133	2	NA	NA	NA	NA
BMP2	RARB	Activation	0.782337	1.5	0.829954	1	0.73472	2	NA	NA
BMP2	RARG	Inhibition	-0.736371	3	-0.732376	3	-0.708398	3	-0.76834	3
BMP2	SALL1	Inhibition	-0.770463	3	-0.76883	3	NA	NA	-0.772097	3
BMP2	SALL3	Inhibition	-0.744315	2.5	-0.811695	2	-0.676935	3	NA	NA
BMP2	SALL4	Inhibition	-0.734509	3	-0.758935	3	NA	NA	-0.710083	3
BMP2	SCAPER	Activation	0.786506	1.5	0.775065	2	NA	NA	0.797948	1
BMP2	SMAD9	Activation	0.841456	1	0.826677	1	0.856235	1	NA	NA
BMP2	SNAI1	Inhibition	-0.693265	2.66667	-0.687772	2	-0.722706	3	-0.669317	3
BMP2	SOX6	Activation	0.711697	2	0.630173	2	NA	NA	0.793222	2
BMP2	SP5	Inhibition	-0.817316	2.66667	-0.805999	3	-0.788485	3	-0.857465	2
BMP2	SRY	Inhibition	-0.707051	2.5	-0.713394	2	-0.700707	3	NA	NA
BMP2	TBX18	Activation	0.691635	3	0.67756	3	NA	NA	0.705709	3
BMP2	TBX2	Activation	0.800711	2.33333	0.688997	3	0.852497	3	0.860638	1
BMP2	TBX5	Activation	0.78167	2.33333	0.806781	2	0.682495	3	0.855735	2
BMP2	TBXT	Inhibition	-0.805236	2	-0.776635	2	-0.811795	2	-0.827279	2
BMP2	TCF19	Inhibition	-0.660875	1.5	-0.637835	1	NA	NA	-0.683916	2
BMP2	TCF21	Activation	0.769737	1.5	0.801305	1	NA	NA	0.738168	2
BMP2	TGIF1	Inhibition	-0.783846	2.66667	-0.804763	3	-0.746281	3	-0.800495	2
BMP2	TRPS1	Activation	0.704732	2	0.704732	2	NA	NA	NA	NA
BMP2	TSC22D3	Activation	0.749009	2.66667	0.758619	2	0.811527	3	0.67688	3
BMP2	TSHZ2	Activation	0.800771	2.33333	0.797017	2	0.824861	3	0.780436	2
BMP2	VENTX	Inhibition	-0.76367	3	-0.729225	3	-0.768049	3	-0.793735	3
BMP2	WDHD1	Inhibition	-0.79905	2.66667	-0.770576	2	-0.795728	3	-0.830846	3
BMP2	ZBTB20	Activation	0.779787	2.33333	0.753696	2	0.75138	3	0.834285	2
BMP2	ZEB1	Activation	0.802553	1	0.802553	1	NA	NA	NA	NA
BMP2	ZFHX3	Activation	0.769216	2.33333	0.650586	2	0.84826	3	0.808801	2
BMP2	ZFP36L1	Activation	0.730565	2.33333	0.733701	1	0.687967	3	0.770026	3
BMP2	ZFP42	Inhibition	-0.778338	2.33333	-0.746574	3	-0.807059	2	-0.781381	2
BMP2	ZFPM2	Activation	0.789988	2.33333	0.770706	2	0.773519	3	0.82574	2
BMP2	ZIC2	Inhibition	-0.856964	1.33333	-0.82759	1	-0.827824	2	-0.915478	1
BMP2	ZIC3	Inhibition	-0.829193	3	-0.842415	3	-0.733865	3	-0.911299	3
BMP2	ZIC5	Inhibition	-0.747333	1.5	-0.775503	1	-0.719164	2	NA	NA
BMP2	ZMAT3	Activation	0.711327	2.66667	0.706157	3	0.6602	3	0.767622	2
BMP2	ZNF121	Inhibition	-0.765723	1	-0.722545	1	-0.808902	1	NA	NA
BMP2	ZNF428	Activation	0.769869	1.5	0.760216	2	0.779522	1	NA	NA
BMP2	ZNF467	Activation	0.773793	1.66667	0.666828	1	0.820527	3	0.834023	1
BMP2	ZNF503	Activation	0.746036	2.5	0.722273	2	0.7698	3	NA	NA
BMP2	ZNF649	Inhibition	-0.838641	1.66667	-0.743672	2	-0.87977	2	-0.892481	1
BMP2	ZNF670	Inhibition	-0.792605	3	-0.772803	3	-0.747347	3	-0.857666	3
BMP2	ZNF695	Inhibition	-0.785735	2.66667	-0.790585	2	-0.769626	3	-0.796995	3
BMP2	ZNF721	Inhibition	-0.768719	1.66667	-0.73903	3	-0.784174	1	-0.782953	1
BMP2	ZNF724	Inhibition	-0.750933	3	-0.699696	3	-0.803963	3	-0.749141	3
BMP2	ZNF732	Inhibition	-0.730174	2.66667	-0.759113	3	-0.705217	2	-0.726191	3
BMP2	ZNF788P	Inhibition	-0.777781	2.66667	-0.746239	3	-0.754649	3	-0.832456	2
BMP2	ZNF860	Inhibition	-0.735036	1	-0.735036	1	NA	NA	NA	NA
BMP2	ZNF93	Inhibition	-0.787756	1.66667	-0.760857	2	-0.745149	1	-0.857261	2
BMP2	ZSCAN10	Inhibition	-0.823389	1.5	-0.787929	1	-0.858849	2	NA	NA
BNC1	ASH1L	Activation	0.705087	2	0.729078	2	0.737264	2	0.648919	2
BNC1	BCL11A	Activation	0.722078	3	0.674501	3	NA	NA	0.769655	3
BNC1	BHLHE40	Activation	0.663558	3	0.685821	3	0.641295	3	NA	NA
BNC1	BHLHE41	Activation	0.640709	3	0.640709	3	NA	NA	NA	NA
BNC1	CAMTA2	Activation	0.736531	1.5	0.749516	1	0.723547	2	NA	NA
BNC1	CASZ1	Activation	0.807055	2.66667	0.771354	3	0.796467	2	0.853346	3
BNC1	CDX2	Inhibition	-0.706032	3	-0.698365	3	NA	NA	-0.713699	3
BNC1	CEBPD	Activation	0.713113	2	0.727448	1	0.729409	2	0.682483	3
BNC1	E2F7	Inhibition	-0.79728	2.5	-0.82018	2	NA	NA	-0.77438	3
BNC1	EOMES	Inhibition	-0.789279	1.5	-0.79048	2	NA	NA	-0.788077	1
BNC1	ESRRG	Activation	0.857609	1.66667	0.866388	2	0.803852	2	0.902586	1
BNC1	ETS2	Activation	0.801976	3	0.783119	3	NA	NA	0.820833	3
BNC1	ETV1	Activation	0.811781	3	0.817421	3	NA	NA	0.806141	3
BNC1	EVX1	Inhibition	-0.699177	2	-0.715896	2	NA	NA	-0.682459	2
BNC1	FOXA3	Inhibition	-0.772958	2.33333	-0.777923	2	-0.714034	3	-0.826916	2
BNC1	FOXH1	Inhibition	-0.738502	2.33333	-0.738607	2	-0.668001	2	-0.808899	3
BNC1	FOXM1	Inhibition	-0.816377	3	-0.844378	3	-0.80118	3	-0.803573	3
BNC1	HIF3A	Activation	0.682953	2.5	0.713021	3	NA	NA	0.652885	2
BNC1	HMBOX1	Activation	0.852589	2	0.904416	2	0.759386	1	0.893965	3
BNC1	HMGA1	Inhibition	-0.792824	2.33333	-0.805338	3	-0.765027	2	-0.808107	2
BNC1	HOXA1	Inhibition	-0.762157	3	-0.772577	3	-0.658554	3	-0.85534	3
BNC1	ID3	Inhibition	-0.724208	3	-0.761522	3	NA	NA	-0.686893	3
BNC1	IRF2	Activation	0.685902	3	0.655143	3	NA	NA	0.716662	3
BNC1	IRX4	Activation	0.740728	2.66667	0.699084	3	0.671072	2	0.852028	3
BNC1	JAZF1	Activation	0.745546	3	0.7589	3	0.671088	3	0.80665	3
BNC1	JUN	Activation	0.856307	1	0.856307	1	NA	NA	NA	NA
BNC1	KDM4C	Activation	0.770521	3	0.843571	3	0.672299	3	0.795693	3
BNC1	LHX1	Inhibition	-0.790822	2.66667	-0.833251	3	-0.679916	2	-0.8593	3
BNC1	MEF2A	Activation	0.835618	2.33333	0.846351	3	0.795933	2	0.864571	2
BNC1	MIS18BP1	Inhibition	-0.908824	2.5	-0.910029	3	NA	NA	-0.90762	2
BNC1	MITF	Activation	0.853392	2	0.885101	1	0.785209	3	0.889866	2
BNC1	MYBL2	Inhibition	-0.842976	2.33333	-0.884749	2	-0.801966	2	-0.842213	3
BNC1	MYCL	Inhibition	-0.754193	2.5	-0.790621	3	-0.717764	2	NA	NA
BNC1	NFATC2	Activation	0.825737	2.33333	0.826664	3	0.717741	2	0.932806	2
BNC1	NFE2L3	Inhibition	-0.695302	1	-0.695302	1	NA	NA	NA	NA
BNC1	NFIA	Activation	0.763417	3	0.773856	3	0.714847	3	0.801546	3
BNC1	NFIB	Activation	0.748052	2.66667	0.82533	3	0.65015	2	0.768676	3
BNC1	NFIC	Activation	0.713916	2	0.646146	2	0.781686	2	NA	NA
BNC1	NKX2-5	Activation	0.801492	2.5	0.824672	3	0.778311	2	NA	NA
BNC1	NR3C1	Activation	0.747554	3	0.692947	3	NA	NA	0.80216	3
BNC1	NR6A1	Inhibition	-0.819609	2.66667	-0.854792	3	-0.761467	2	-0.842568	3
BNC1	OTX2	Inhibition	-0.827403	3	-0.875442	3	-0.779364	3	NA	NA
BNC1	OVOL2	Inhibition	-0.755897	2	-0.717512	3	NA	NA	-0.794281	1
BNC1	PITX2	Activation	0.788013	3	0.703872	3	NA	NA	0.872153	3
BNC1	PRDM1	Inhibition	-0.790323	3	-0.799793	3	NA	NA	-0.780854	3
BNC1	PRDM16	Activation	0.708758	2.33333	0.686916	3	0.727646	2	0.711712	2
BNC1	RARG	Inhibition	-0.722763	1.66667	-0.662726	3	-0.683825	1	-0.821739	1
BNC1	RXRG	Activation	0.798626	2	0.798626	2	NA	NA	NA	NA
BNC1	SALL1	Inhibition	-0.832057	3	-0.853916	3	-0.749219	3	-0.893035	3
BNC1	SALL2	Inhibition	-0.768731	3	-0.826441	3	-0.71102	3	NA	NA
BNC1	SALL3	Inhibition	-0.751352	2	-0.751352	2	NA	NA	NA	NA
BNC1	SALL4	Inhibition	-0.802902	2.66667	-0.835762	3	-0.755429	2	-0.817515	3
BNC1	SCAPER	Activation	0.801249	2	0.850577	2	0.751921	2	NA	NA
BNC1	SP5	Inhibition	-0.832799	2	-0.785316	2	NA	NA	-0.880281	2
BNC1	SP6	Inhibition	-0.732256	3	-0.702648	3	NA	NA	-0.761864	3
BNC1	SRY	Inhibition	-0.729175	2	-0.729175	2	NA	NA	NA	NA
BNC1	STAT3	Activation	0.660165	3	0.641807	3	0.683929	3	0.654758	3
BNC1	TBX18	Activation	0.912232	2.5	0.925426	2	NA	NA	0.899039	3
BNC1	TBXT	Inhibition	-0.670641	2	-0.670641	2	NA	NA	NA	NA
BNC1	TCF25	Activation	0.823903	2	0.818961	2	0.828845	2	NA	NA
BNC1	TFAP2C	Inhibition	-0.728997	2.66667	-0.662087	3	-0.660939	2	-0.863967	3
BNC1	TGIF1	Inhibition	-0.85173	2.5	-0.811538	3	NA	NA	-0.891921	2
BNC1	TP53	Inhibition	-0.763455	2	-0.744076	2	-0.782834	2	NA	NA
BNC1	VENTX	Inhibition	-0.795679	3	-0.729075	3	NA	NA	-0.862283	3
BNC1	WDHD1	Inhibition	-0.863507	2	-0.87443	3	-0.780998	1	-0.935092	2
BNC1	WT1	Activation	0.864398	2	0.864398	2	NA	NA	NA	NA
BNC1	ZFP36L1	Activation	0.83587	2.33333	0.914363	3	0.769573	2	0.823674	2
BNC1	ZFP42	Inhibition	-0.852342	2.33333	-0.896446	3	-0.794037	1	-0.866543	3
BNC1	ZIC3	Inhibition	-0.844765	1.5	-0.827768	1	NA	NA	-0.861761	2
BNC1	ZMAT3	Activation	0.751306	2	0.778479	3	NA	NA	0.724134	1
BNC1	ZNF215	Inhibition	-0.830799	2.33333	-0.870995	2	-0.804631	2	-0.816773	3
BNC1	ZNF25	Activation	0.706084	3	0.689215	3	0.722953	3	NA	NA
BNC1	ZNF273	Inhibition	-0.843121	1	-0.900984	1	-0.766553	1	-0.861827	1
BNC1	ZNF385B	Activation	0.743821	2.66667	0.714292	2	0.728465	3	0.788707	3
BNC1	ZNF428	Activation	0.88598	3	0.88598	3	NA	NA	NA	NA
BNC1	ZNF436	Activation	0.810282	3	0.854516	3	0.766048	3	NA	NA
BNC1	ZNF611	Inhibition	-0.722502	3	-0.778052	3	NA	NA	-0.666953	3
BNC1	ZNF670	Inhibition	-0.849426	1.66667	-0.85705	2	-0.797223	1	-0.894006	2
BNC1	ZNF695	Inhibition	-0.827375	2.33333	-0.872602	3	-0.752433	2	-0.857092	2
BNC1	ZNF724	Inhibition	-0.818372	1.66667	-0.865086	2	-0.740823	1	-0.849208	2
BNC1	ZNF730	Inhibition	-0.82517	2.33333	-0.84675	3	-0.764674	2	-0.864086	2
BNC1	ZNF732	Inhibition	-0.818115	1.66667	-0.907284	2	-0.738468	1	-0.808594	2
BNC1	ZNF788P	Inhibition	-0.798128	2	-0.87139	2	-0.724867	2	NA	NA
BNC1	ZNF90	Inhibition	-0.826401	2.33333	-0.842259	3	-0.738504	2	-0.89844	2
BNC1	ZNF93	Inhibition	-0.83987	2	-0.925841	3	-0.665722	2	-0.928049	1
CAMTA2	ARID5B	Activation	0.778023	2.66667	0.814906	2	0.836837	3	0.682326	3
CAMTA2	BCL11A	Activation	0.686328	3	0.692624	3	0.680033	3	NA	NA
CAMTA2	BNC1	Activation	0.690462	1	0.731597	1	NA	NA	0.649327	1
CAMTA2	CASZ1	Activation	0.75689	2.66667	0.698847	3	0.820937	2	0.750885	3
CAMTA2	CEBPD	Activation	0.714225	2	0.721381	2	0.764481	1	0.656813	3
CAMTA2	CREB5	Activation	0.71459	2.66667	0.79627	2	0.679946	3	0.667552	3
CAMTA2	E2F7	Inhibition	-0.728174	1.33333	-0.663045	1	-0.778774	1	-0.742704	2
CAMTA2	EGR1	Activation	0.673602	1	0.673602	1	NA	NA	NA	NA
CAMTA2	EOMES	Inhibition	-0.733499	1	-0.79405	1	NA	NA	-0.672948	1
CAMTA2	ESRRG	Activation	0.765007	1	0.765007	1	NA	NA	NA	NA
CAMTA2	ETS2	Activation	0.714959	3	0.778559	3	0.651358	3	NA	NA
CAMTA2	ETV1	Activation	0.692602	3	0.699104	3	NA	NA	0.686099	3
CAMTA2	FOXA3	Inhibition	-0.746401	1	-0.789915	1	-0.778436	1	-0.670852	1
CAMTA2	FOXH1	Inhibition	-0.715048	2	-0.685463	2	-0.780421	1	-0.679259	3
CAMTA2	FOXM1	Inhibition	-0.732307	2.33333	-0.664135	2	-0.823962	2	-0.708824	3
CAMTA2	GATA3	Inhibition	-0.69045	3	-0.66774	3	-0.71316	3	NA	NA
CAMTA2	HMGA1	Inhibition	-0.749961	1.66667	-0.683264	1	-0.871348	2	-0.695272	2
CAMTA2	HOXB4	Activation	0.688347	1	0.708649	1	NA	NA	0.668045	1
CAMTA2	IRF2	Activation	0.696392	3	0.658952	3	0.786345	3	0.643878	3
CAMTA2	IRF9	Activation	0.78637	2	0.791284	3	0.781456	1	NA	NA
CAMTA2	JAZF1	Activation	0.718888	2.66667	0.646846	2	0.731356	3	0.778461	3
CAMTA2	KDM4C	Activation	0.816038	2.5	0.742768	2	0.889308	3	NA	NA
CAMTA2	LHX1	Inhibition	-0.752863	1.66667	-0.840911	2	-0.731769	1	-0.685909	2
CAMTA2	MAF	Activation	0.727246	3	0.727246	3	NA	NA	NA	NA
CAMTA2	MESP2	Inhibition	-0.723317	1	-0.723317	1	NA	NA	NA	NA
CAMTA2	MYBL2	Inhibition	-0.709326	1.5	-0.721845	1	NA	NA	-0.696806	2
CAMTA2	MYCL	Inhibition	-0.733709	2	-0.720935	3	-0.746484	1	NA	NA
CAMTA2	NFIA	Activation	0.753476	2.66667	0.713136	3	0.851891	2	0.695402	3
CAMTA2	NFIB	Activation	0.762675	2.66667	0.813164	3	0.815288	2	0.659572	3
CAMTA2	NR3C1	Activation	0.685945	3	0.700892	3	0.709851	3	0.647093	3
CAMTA2	NR6A1	Inhibition	-0.751706	3	-0.728468	3	-0.868185	3	-0.658464	3
CAMTA2	PITX2	Activation	0.764919	2	0.764919	2	NA	NA	NA	NA
CAMTA2	PLAGL1	Activation	0.733185	2.66667	0.715527	3	0.77104	2	0.712987	3
CAMTA2	PRDM1	Inhibition	-0.704731	2.66667	-0.686712	2	-0.72217	3	-0.705312	3
CAMTA2	PRDM16	Activation	0.732117	3	0.732117	3	NA	NA	NA	NA
CAMTA2	SALL1	Inhibition	-0.806599	2.33333	-0.823099	2	-0.86813	2	-0.728568	3
CAMTA2	SALL2	Inhibition	-0.732554	3	-0.670343	3	-0.794765	3	NA	NA
CAMTA2	SALL4	Inhibition	-0.773069	2.33333	-0.739215	1	-0.86319	3	-0.716804	3
CAMTA2	SKIL	Activation	0.658921	3	0.645323	3	0.672519	3	NA	NA
CAMTA2	SMAD9	Activation	0.699735	1	0.699735	1	NA	NA	NA	NA
CAMTA2	SP5	Inhibition	-0.739406	1.5	-0.768949	1	NA	NA	-0.709863	2
CAMTA2	SRY	Inhibition	-0.654293	2	-0.645344	3	-0.663241	1	NA	NA
CAMTA2	STAT3	Activation	0.734382	3	0.650008	3	0.890941	3	0.662197	3
CAMTA2	TBX18	Activation	0.781462	3	0.821383	3	0.836421	3	0.686582	3
CAMTA2	TCF25	Activation	0.749683	3	0.749683	3	NA	NA	NA	NA
CAMTA2	TRPS1	Activation	0.726523	3	0.767627	3	NA	NA	0.685419	3
CAMTA2	TSHZ1	Activation	0.674395	1.5	0.696935	2	NA	NA	0.651856	1
CAMTA2	TSHZ3	Activation	0.769071	2	0.769071	2	NA	NA	NA	NA
CAMTA2	WDHD1	Inhibition	-0.731804	2	-0.755985	1	NA	NA	-0.707622	3
CAMTA2	WT1	Activation	0.739417	3	0.810345	3	NA	NA	0.668489	3
CAMTA2	ZFHX3	Activation	0.719639	1.66667	0.791016	3	0.702789	1	0.665112	1
CAMTA2	ZFP36L1	Activation	0.734704	2	0.751382	1	NA	NA	0.718026	3
CAMTA2	ZFP42	Inhibition	-0.778564	3	-0.778564	3	NA	NA	NA	NA
CAMTA2	ZFPM2	Activation	0.735855	1.66667	0.790649	1	0.717206	1	0.699709	3
CAMTA2	ZNF215	Inhibition	-0.685782	1	-0.685782	1	NA	NA	NA	NA
CAMTA2	ZNF273	Inhibition	-0.762944	1.5	-0.758825	1	NA	NA	-0.767063	2
CAMTA2	ZNF385B	Activation	0.759272	2.5	0.652	2	0.866543	3	NA	NA
CAMTA2	ZNF436	Activation	0.722885	3	0.639805	3	0.805965	3	NA	NA
CAMTA2	ZNF611	Inhibition	-0.757938	3	-0.730053	3	-0.785823	3	NA	NA
CAMTA2	ZNF670	Inhibition	-0.772156	1.66667	-0.76035	1	-0.798012	1	-0.758106	3
CAMTA2	ZNF695	Inhibition	-0.744762	2	-0.730983	1	NA	NA	-0.758541	3
CAMTA2	ZNF704	Activation	0.684886	3	0.684886	3	NA	NA	NA	NA
CAMTA2	ZNF724	Inhibition	-0.751038	2	-0.749278	1	NA	NA	-0.752798	3
CAMTA2	ZNF730	Inhibition	-0.742748	3	-0.703457	3	NA	NA	-0.782039	3
CAMTA2	ZNF732	Inhibition	-0.767422	2	-0.757921	1	-0.756886	2	-0.787459	3
CAMTA2	ZNF788P	Inhibition	-0.762676	1.5	-0.787105	1	NA	NA	-0.738247	2
CAMTA2	ZNF90	Inhibition	-0.759008	2.5	-0.725692	2	NA	NA	-0.792323	3
CARHSP1	AHR	Inhibition	-0.642294	3	-0.642294	3	NA	NA	NA	NA
CARHSP1	ARID5B	Inhibition	-0.876548	2	-0.92269	2	-0.832665	3	-0.874289	1
CARHSP1	BCL11A	Inhibition	-0.714699	3	-0.656673	3	NA	NA	-0.772724	3
CARHSP1	BHLHE40	Inhibition	-0.744329	3	-0.744329	3	NA	NA	NA	NA
CARHSP1	BHLHE41	Inhibition	-0.696917	3	-0.696917	3	NA	NA	NA	NA
CARHSP1	CAMTA2	Inhibition	-0.780343	2	-0.792071	1	-0.768616	3	NA	NA
CARHSP1	CASZ1	Inhibition	-0.886944	2	-0.815004	1	-0.925819	2	-0.92001	3
CARHSP1	CDX2	Activation	0.761071	3	0.739101	3	NA	NA	0.783041	3
CARHSP1	CEBPD	Inhibition	-0.812474	3	-0.80794	3	NA	NA	-0.817008	3
CARHSP1	CREB5	Inhibition	-0.819624	3	-0.870052	3	NA	NA	-0.769195	3
CARHSP1	E2F7	Activation	0.832332	2.66667	0.817273	2	0.865425	3	0.814298	3
CARHSP1	EGR1	Inhibition	-0.758236	2	-0.758236	2	NA	NA	NA	NA
CARHSP1	EOMES	Activation	0.828126	2	0.8257	2	0.824971	2	0.833708	2
CARHSP1	EPAS1	Inhibition	-0.677427	2	-0.677427	2	NA	NA	NA	NA
CARHSP1	ESRRG	Inhibition	-0.920259	1.66667	-0.910531	1	-0.929221	2	-0.921025	2
CARHSP1	ETS2	Inhibition	-0.774886	3	-0.827306	3	-0.64543	3	-0.851921	3
CARHSP1	ETV1	Inhibition	-0.730133	3	-0.702764	3	-0.763455	3	-0.724181	3
CARHSP1	EVX1	Activation	0.739959	3	0.723056	3	0.722374	3	0.774447	3
CARHSP1	FOXA3	Activation	0.839513	2	0.861255	3	0.815078	1	0.842207	2
CARHSP1	FOXH1	Activation	0.805511	2.66667	0.824469	2	0.799782	3	0.792283	3
CARHSP1	FOXM1	Activation	0.863247	2.66667	0.83212	2	0.896032	3	0.861588	3
CARHSP1	GATA3	Activation	0.700594	3	0.646897	3	NA	NA	0.754291	3
CARHSP1	HIF3A	Inhibition	-0.780733	2.66667	-0.752477	3	-0.776735	2	-0.812986	3
CARHSP1	HMGA1	Activation	0.867212	2.66667	0.869882	3	0.86982	3	0.861935	2
CARHSP1	HOXA1	Activation	0.768942	3	0.739254	3	0.701903	3	0.865669	3
CARHSP1	ID3	Activation	0.755852	3	0.768238	3	0.710269	3	0.789051	3
CARHSP1	IRF2	Inhibition	-0.738109	3	-0.745574	3	-0.658329	3	-0.810423	3
CARHSP1	IRX4	Inhibition	-0.821901	2.66667	-0.741644	3	-0.848943	3	-0.875115	2
CARHSP1	JAZF1	Inhibition	-0.802106	3	-0.785081	3	-0.79219	3	-0.829047	3
CARHSP1	JUN	Inhibition	-0.813173	3	-0.899088	3	-0.68505	3	-0.855383	3
CARHSP1	KDM4C	Inhibition	-0.817328	3	-0.863917	3	-0.809154	3	-0.778913	3
CARHSP1	LHX1	Activation	0.884314	3	0.892994	3	0.877551	3	0.882396	3
CARHSP1	MAF	Inhibition	-0.802795	2.33333	-0.808661	3	-0.807799	1	-0.791925	3
CARHSP1	MEF2A	Inhibition	-0.928106	1.66667	-0.892877	1	-0.949302	2	-0.942138	2
CARHSP1	MESP2	Activation	0.729365	3	0.701409	3	0.78475	3	0.701936	3
CARHSP1	MIS18BP1	Activation	0.893831	2	0.896678	1	0.892312	2	0.892504	3
CARHSP1	MITF	Inhibition	-0.938922	1.66667	-0.945656	1	-0.945523	2	-0.925588	2
CARHSP1	MYBL2	Activation	0.900086	2.33333	0.907021	2	0.912597	2	0.880639	3
CARHSP1	MYCL	Activation	0.76797	2	0.80346	3	0.732481	1	NA	NA
CARHSP1	NFE2L3	Activation	0.786665	1	0.777331	1	NA	NA	0.795999	1
CARHSP1	NFIA	Inhibition	-0.846048	3	-0.851634	3	-0.817586	3	-0.868923	3
CARHSP1	NFIB	Inhibition	-0.87121	3	-0.907654	3	NA	NA	-0.834766	3
CARHSP1	NFIC	Inhibition	-0.839296	1.5	-0.794529	2	NA	NA	-0.884064	1
CARHSP1	NR3C1	Inhibition	-0.777753	3	-0.729435	3	NA	NA	-0.82607	3
CARHSP1	NR6A1	Activation	0.893742	3	0.892075	3	0.902869	3	0.886281	3
CARHSP1	OTX2	Activation	0.913168	2.33333	0.945935	2	0.858195	3	0.935372	2
CARHSP1	PITX2	Inhibition	-0.815482	3	-0.79298	3	NA	NA	-0.837985	3
CARHSP1	PRDM1	Activation	0.742774	3	0.727075	3	NA	NA	0.758473	3
CARHSP1	PRDM16	Inhibition	-0.756201	2	-0.748294	1	-0.731115	3	-0.789195	2
CARHSP1	RARG	Activation	0.759735	2	0.672965	2	0.846505	2	NA	NA
CARHSP1	RXRG	Inhibition	-0.784138	1.5	-0.780196	1	-0.788081	2	NA	NA
CARHSP1	SALL1	Activation	0.876624	3	0.886505	3	0.852457	3	0.890911	3
CARHSP1	SALL2	Activation	0.882959	1.33333	0.894647	2	0.859139	1	0.895091	1
CARHSP1	SALL3	Activation	0.76573	3	0.76573	3	NA	NA	NA	NA
CARHSP1	SALL4	Activation	0.864005	2.66667	0.891335	3	0.847978	3	0.852703	2
CARHSP1	SCAPER	Inhibition	-0.87401	2.33333	-0.92097	2	-0.813695	3	-0.887364	2
CARHSP1	SP5	Activation	0.802352	2.66667	0.803486	2	0.797546	3	0.806024	3
CARHSP1	SP6	Activation	0.730637	3	0.669784	3	NA	NA	0.791489	3
CARHSP1	SRY	Activation	0.808176	1	0.808176	1	NA	NA	NA	NA
CARHSP1	STAT3	Inhibition	-0.730102	3	-0.731156	3	-0.712127	3	-0.747023	3
CARHSP1	STAT4	Inhibition	-0.685245	2.5	-0.691693	3	NA	NA	-0.678798	2
CARHSP1	TBX18	Inhibition	-0.863078	2.66667	-0.934072	3	-0.746183	3	-0.908978	2
CARHSP1	TBXT	Activation	0.712878	2	0.710254	2	0.732257	2	0.696124	2
CARHSP1	TCF25	Inhibition	-0.831195	2	-0.841435	2	NA	NA	-0.820956	2
CARHSP1	TGIF1	Activation	0.912511	2	0.912688	1	0.910831	3	0.914016	2
CARHSP1	TRPS1	Inhibition	-0.81311	2.5	-0.84839	2	NA	NA	-0.777831	3
CARHSP1	TSHZ3	Inhibition	-0.734135	3	-0.766951	3	NA	NA	-0.701319	3
CARHSP1	VENTX	Activation	0.692587	3	0.692587	3	NA	NA	NA	NA
CARHSP1	WDHD1	Activation	0.911355	2.66667	0.904197	3	0.928182	2	0.901687	3
CARHSP1	WT1	Inhibition	-0.895426	3	-0.897918	3	NA	NA	-0.892935	3
CARHSP1	ZEB1	Inhibition	-0.913278	1.5	-0.903411	2	NA	NA	-0.923144	1
CARHSP1	ZFP36L1	Inhibition	-0.909977	2.66667	-0.911658	3	-0.894774	3	-0.923499	2
CARHSP1	ZFP42	Activation	0.941366	2.33333	0.93765	3	0.956802	1	0.929647	3
CARHSP1	ZIC2	Activation	0.911881	1	0.909898	1	0.928039	1	0.897707	1
CARHSP1	ZMAT3	Inhibition	-0.793877	2.66667	-0.833435	3	-0.781558	3	-0.766637	2
CARHSP1	ZNF101	Activation	0.80248	1	0.80248	1	NA	NA	NA	NA
CARHSP1	ZNF124	Activation	0.7033	3	0.659104	3	0.747496	3	NA	NA
CARHSP1	ZNF215	Activation	0.853624	1.33333	0.84905	1	0.867961	2	0.843861	1
CARHSP1	ZNF25	Inhibition	-0.720558	2.33333	-0.720604	3	-0.772185	2	-0.668884	2
CARHSP1	ZNF273	Activation	0.898135	2.33333	0.902307	2	0.89998	2	0.892118	3
CARHSP1	ZNF385B	Inhibition	-0.782136	2.33333	-0.808987	2	-0.79986	3	-0.737561	2
CARHSP1	ZNF428	Inhibition	-0.922762	2	-0.923063	3	NA	NA	-0.922462	1
CARHSP1	ZNF611	Activation	0.783093	3	0.783093	3	NA	NA	NA	NA
CARHSP1	ZNF670	Activation	0.908236	2	0.916076	2	0.901841	2	0.906792	2
CARHSP1	ZNF695	Activation	0.907239	1.66667	0.909576	1	0.936711	2	0.875431	2
CARHSP1	ZNF730	Activation	0.877921	2	0.869493	1	0.912011	2	0.852259	3
CARHSP1	ZNF788P	Activation	0.904461	2	0.936377	2	0.885546	2	0.891461	2
CARHSP1	ZNF90	Activation	0.919176	1.33333	0.889008	1	0.963693	2	0.904829	1
CARHSP1	ZNF93	Activation	0.932557	1	0.93825	1	0.913618	1	0.945803	1
CASZ1	ASH1L	Activation	0.850727	2.33333	0.894272	2	0.868574	3	0.789333	2
CASZ1	BHLHE41	Activation	0.840902	3	0.840902	3	NA	NA	NA	NA
CASZ1	BMP2	Activation	0.637587	1	0.637587	1	NA	NA	NA	NA
CASZ1	CEBPD	Activation	0.813042	2.33333	0.80857	2	0.749768	2	0.880789	3
CASZ1	EGR1	Activation	0.779747	2	0.779747	2	NA	NA	NA	NA
CASZ1	ETS2	Activation	0.834259	3	0.821099	3	0.78211	3	0.899567	3
CASZ1	FOXA3	Inhibition	-0.872105	1	-0.872105	1	NA	NA	NA	NA
CASZ1	FOXH1	Inhibition	-0.843681	2.66667	-0.799005	2	-0.897445	3	-0.834594	3
CASZ1	GATA3	Inhibition	-0.826646	3	-0.801209	3	NA	NA	-0.852083	3
CASZ1	HAND1	Inhibition	-0.686692	3	-0.710413	3	NA	NA	-0.662972	3
CASZ1	HIF3A	Activation	0.887129	2.66667	0.891525	2	0.894123	3	0.875741	3
CASZ1	HMGA1	Inhibition	-0.927994	1.33333	-0.936998	1	-0.929484	1	-0.9175	2
CASZ1	HOPX	Activation	0.675843	3	0.70357	3	NA	NA	0.648116	3
CASZ1	HOXA1	Inhibition	-0.73049	3	-0.695495	3	-0.743354	3	-0.752621	3
CASZ1	ID1	Inhibition	-0.746579	3	-0.739206	3	NA	NA	-0.753953	3
CASZ1	ID3	Inhibition	-0.807708	3	-0.822937	3	-0.745642	3	-0.854546	3
CASZ1	IRF2	Activation	0.865864	3	0.899645	3	0.783933	3	0.914013	3
CASZ1	IRF9	Activation	0.78959	2.33333	0.738693	1	0.744896	3	0.885181	3
CASZ1	JAZF1	Activation	0.855101	2.66667	0.84412	3	0.823607	3	0.897575	2
CASZ1	JUNB	Activation	0.771724	2.66667	0.759221	3	0.790456	3	0.765494	2
CASZ1	KDM4C	Activation	0.813585	2	0.753763	1	0.89808	3	0.788911	2
CASZ1	LEF1	Inhibition	-0.768085	3	-0.783315	3	-0.703614	3	-0.817325	3
CASZ1	LHX1	Inhibition	-0.724907	2	-0.707724	1	-0.743171	3	-0.723828	2
CASZ1	MSX1	Inhibition	-0.794198	3	-0.765324	3	NA	NA	-0.823071	3
CASZ1	MSX2	Inhibition	-0.770726	3	-0.699346	3	NA	NA	-0.842106	3
CASZ1	MXD1	Activation	0.818936	2	0.818936	2	NA	NA	NA	NA
CASZ1	MYCL	Inhibition	-0.835101	2	-0.872051	2	-0.840459	1	-0.792793	3
CASZ1	NFIB	Activation	0.863935	2	0.881803	1	0.779506	3	0.930497	2
CASZ1	NFIC	Activation	0.893616	3	0.906561	3	0.88067	3	NA	NA
CASZ1	NR3C1	Activation	0.85635	2.33333	0.866999	2	0.784945	3	0.917105	2
CASZ1	OVOL2	Inhibition	-0.831459	2	-0.831459	2	NA	NA	NA	NA
CASZ1	PLAGL1	Activation	0.81296	2	0.706187	2	0.919734	2	NA	NA
CASZ1	SALL2	Inhibition	-0.861906	3	-0.837992	3	-0.946338	3	-0.801389	3
CASZ1	SALL3	Inhibition	-0.697492	1	-0.697492	1	NA	NA	NA	NA
CASZ1	SP6	Inhibition	-0.71319	3	-0.76218	3	NA	NA	-0.664199	3
CASZ1	STAT3	Activation	0.863279	3	0.904778	3	0.802902	3	0.882157	3
CASZ1	STAT4	Activation	0.791148	2	0.826669	1	NA	NA	0.755627	3
CASZ1	TCF25	Activation	0.855546	1.33333	0.852662	2	0.912998	1	0.800977	1
CASZ1	TFAP2C	Inhibition	-0.817872	1	-0.820025	1	-0.815719	1	NA	NA
CASZ1	TOX3	Inhibition	-0.651033	1	-0.651033	1	NA	NA	NA	NA
CASZ1	TP53	Inhibition	-0.769319	1	-0.769319	1	NA	NA	NA	NA
CASZ1	TRPS1	Activation	0.734261	2	0.746651	2	0.64276	1	0.813372	3
CASZ1	TSC22D3	Activation	0.784445	2.5	0.68511	3	NA	NA	0.88378	2
CASZ1	TSHZ2	Activation	0.747109	2	0.747109	2	NA	NA	NA	NA
CASZ1	ZEB1	Activation	0.849882	3	0.840171	3	NA	NA	0.859593	3
CASZ1	ZFP36L1	Activation	0.90103	2	0.871282	1	0.930779	3	NA	NA
CASZ1	ZNF124	Inhibition	-0.81942	3	-0.877581	3	-0.81071	3	-0.769969	3
CASZ1	ZNF25	Activation	0.828333	2.33333	0.861316	2	0.8811	3	0.742584	2
CASZ1	ZNF273	Inhibition	-0.803515	1	-0.803515	1	NA	NA	NA	NA
CASZ1	ZNF385B	Activation	0.85349	1.33333	0.879183	1	0.908206	2	0.773081	1
CASZ1	ZNF436	Activation	0.910732	1.66667	0.871991	1	0.940449	1	0.919756	3
CASZ1	ZNF589	Inhibition	-0.645829	1	-0.645829	1	NA	NA	NA	NA
CASZ1	ZNF611	Inhibition	-0.731108	3	-0.813544	3	-0.73886	3	-0.640919	3
CASZ1	ZNF695	Inhibition	-0.843486	1	-0.843486	1	NA	NA	NA	NA
CASZ1	ZNF704	Activation	0.694349	1	0.694349	1	NA	NA	NA	NA
CDX2	BCL11A	Inhibition	-0.636557	2	-0.636557	2	NA	NA	NA	NA
CDX2	HAND1	Activation	0.732406	1	0.732406	1	NA	NA	NA	NA
CDX2	HOXB2	Activation	0.709746	2	0.709746	2	NA	NA	NA	NA
CDX2	ID2	Activation	0.678202	3	0.678202	3	NA	NA	NA	NA
CDX2	ID4	Activation	0.649814	1	0.649814	1	NA	NA	NA	NA
CDX2	IRX3	Activation	0.644444	1	0.644444	1	NA	NA	NA	NA
CDX2	ISL1	Activation	0.700985	1.5	0.711554	1	NA	NA	0.690416	2
CDX2	MEIS1	Activation	0.714303	1	0.714303	1	NA	NA	NA	NA
CDX2	MSX2	Activation	0.695257	1	0.695257	1	NA	NA	NA	NA
CDX2	NKX3-1	Activation	0.648322	1	0.648322	1	NA	NA	NA	NA
CDX2	PRRX1	Activation	0.716319	3	0.716319	3	NA	NA	NA	NA
CDX2	SKIL	Inhibition	-0.653524	2	-0.653524	2	NA	NA	NA	NA
CDX2	SP6	Activation	0.721684	1	0.721684	1	NA	NA	NA	NA
CEBPD	ASH1L	Activation	0.821918	1.66667	0.867495	3	0.81519	1	0.78307	1
CEBPD	BHLHE40	Activation	0.79058	2.5	0.778842	3	0.802319	2	NA	NA
CEBPD	BHLHE41	Activation	0.779513	3	0.779513	3	NA	NA	NA	NA
CEBPD	CARHSP1	Inhibition	-0.735834	1	-0.776484	1	NA	NA	-0.695183	1
CEBPD	CASZ1	Activation	0.768972	1	0.843611	1	0.694333	1	NA	NA
CEBPD	CREB5	Activation	0.781708	1.66667	0.801251	1	0.711237	2	0.832635	2
CEBPD	E2F7	Inhibition	-0.771254	1	-0.735979	1	NA	NA	-0.806529	1
CEBPD	EGR1	Activation	0.802482	2	0.826206	1	0.778758	3	NA	NA
CEBPD	ETS2	Activation	0.773071	3	0.765341	3	0.693749	3	0.860124	3
CEBPD	FOXA3	Inhibition	-0.771416	1.5	-0.833396	2	-0.709437	1	NA	NA
CEBPD	FOXH1	Inhibition	-0.829234	3	-0.829234	3	NA	NA	NA	NA
CEBPD	FOXM1	Inhibition	-0.77394	1.5	-0.783471	2	-0.764409	1	NA	NA
CEBPD	GATA3	Inhibition	-0.746282	3	-0.773721	3	-0.695984	3	-0.769143	3
CEBPD	HIF3A	Activation	0.818673	2	0.818673	2	NA	NA	NA	NA
CEBPD	HMGA1	Inhibition	-0.902114	2	-0.888474	3	NA	NA	-0.915755	1
CEBPD	HOPX	Activation	0.726612	3	0.748715	3	NA	NA	0.704508	3
CEBPD	HOXA1	Inhibition	-0.691443	3	-0.686095	3	NA	NA	-0.696791	3
CEBPD	ID1	Inhibition	-0.762375	2.5	-0.708379	2	NA	NA	-0.816372	3
CEBPD	ID3	Inhibition	-0.788551	3	-0.772735	3	-0.75297	3	-0.839946	3
CEBPD	IRF2	Activation	0.818336	3	0.806822	3	0.794797	3	0.85339	3
CEBPD	IRX4	Activation	0.811727	1	0.811727	1	NA	NA	NA	NA
CEBPD	JAZF1	Activation	0.799476	1.5	0.774508	2	NA	NA	0.824444	1
CEBPD	KDM4C	Activation	0.736504	2.33333	0.772553	2	0.785082	3	0.651878	2
CEBPD	LEF1	Inhibition	-0.745043	3	-0.714098	3	-0.705076	3	-0.815954	3
CEBPD	LHX1	Inhibition	-0.724115	2	-0.724115	2	NA	NA	NA	NA
CEBPD	MAF	Activation	0.867053	1	0.867053	1	NA	NA	NA	NA
CEBPD	MEF2A	Activation	0.801083	1.5	0.830097	2	NA	NA	0.772069	1
CEBPD	MITF	Activation	0.765325	1	0.778173	1	0.700221	1	0.81758	1
CEBPD	MSX1	Inhibition	-0.68608	3	-0.682883	3	-0.656972	3	-0.718385	3
CEBPD	MYBL2	Inhibition	-0.861059	3	-0.861059	3	NA	NA	NA	NA
CEBPD	MYCL	Inhibition	-0.821706	2.5	-0.83558	3	NA	NA	-0.807833	2
CEBPD	MYCN	Inhibition	-0.654532	2	-0.660153	3	NA	NA	-0.648911	1
CEBPD	NFATC2	Activation	0.691988	2	0.689541	3	NA	NA	0.694434	1
CEBPD	NFIA	Activation	0.85681	1.66667	0.882254	1	0.785441	3	0.902736	1
CEBPD	NFIB	Activation	0.874947	2	0.884393	1	0.810536	3	0.929912	2
CEBPD	NFIC	Activation	0.790067	3	0.808102	3	0.756776	3	0.805324	3
CEBPD	NKX2-5	Activation	0.78462	2	0.78462	2	NA	NA	NA	NA
CEBPD	NR3C1	Activation	0.768605	3	0.864826	3	0.672383	3	NA	NA
CEBPD	OVOL2	Inhibition	-0.776325	3	-0.776325	3	NA	NA	NA	NA
CEBPD	PLAGL1	Activation	0.759672	3	0.759672	3	NA	NA	NA	NA
CEBPD	PRDM1	Inhibition	-0.680227	2	-0.640891	3	NA	NA	-0.719564	1
CEBPD	PROX1	Activation	0.695095	1.5	0.682504	2	NA	NA	0.707686	1
CEBPD	SALL2	Inhibition	-0.823247	3	-0.82136	3	NA	NA	-0.825135	3
CEBPD	SALL3	Inhibition	-0.65875	1	-0.65875	1	NA	NA	NA	NA
CEBPD	SALL4	Inhibition	-0.888122	1	-0.890069	1	NA	NA	-0.886175	1
CEBPD	SCAPER	Activation	0.772162	1	0.820742	1	0.76998	1	0.725763	1
CEBPD	SP6	Inhibition	-0.678066	3	-0.710993	3	NA	NA	-0.645138	3
CEBPD	SRY	Inhibition	-0.706229	1	-0.768496	1	NA	NA	-0.643963	1
CEBPD	STAT3	Activation	0.844251	2.66667	0.840039	3	0.807336	2	0.885378	3
CEBPD	STAT4	Activation	0.822421	2.5	0.8454	2	NA	NA	0.799442	3
CEBPD	TBX18	Activation	0.809604	1.5	0.820019	1	0.799189	2	NA	NA
CEBPD	TBX5	Activation	0.80168	1	0.80168	1	NA	NA	NA	NA
CEBPD	TCF25	Activation	0.766841	2	0.820437	1	0.713245	3	NA	NA
CEBPD	TFAP2C	Inhibition	-0.742403	1.5	-0.755251	2	NA	NA	-0.729554	1
CEBPD	TP53	Inhibition	-0.77992	3	-0.77992	3	NA	NA	NA	NA
CEBPD	TRPS1	Activation	0.804034	3	0.804034	3	NA	NA	NA	NA
CEBPD	WDHD1	Inhibition	-0.851342	1	-0.851342	1	NA	NA	NA	NA
CEBPD	ZBTB20	Activation	0.803419	1	0.831405	1	NA	NA	0.775434	1
CEBPD	ZEB1	Activation	0.834648	3	0.834648	3	NA	NA	NA	NA
CEBPD	ZFP36L1	Activation	0.847135	1	0.847135	1	NA	NA	NA	NA
CEBPD	ZFP42	Inhibition	-0.85405	1	-0.85405	1	NA	NA	NA	NA
CEBPD	ZFPM2	Activation	0.729349	1	0.729349	1	NA	NA	NA	NA
CEBPD	ZNF124	Inhibition	-0.819134	2	-0.794881	2	-0.809025	1	-0.853496	3
CEBPD	ZNF215	Inhibition	-0.817699	1.5	-0.815535	1	NA	NA	-0.819862	2
CEBPD	ZNF25	Activation	0.779193	2.33333	0.805376	3	0.749374	3	0.78283	1
CEBPD	ZNF385B	Activation	0.775404	2.33333	0.831673	3	0.797595	1	0.696945	3
CEBPD	ZNF436	Activation	0.733763	1	0.789793	1	0.677733	1	NA	NA
CEBPD	ZNF611	Inhibition	-0.764099	3	-0.798636	3	-0.729562	3	NA	NA
CEBPD	ZNF704	Activation	0.712818	1	0.712818	1	NA	NA	NA	NA
CEBPD	ZNF730	Inhibition	-0.805351	2	-0.805351	2	NA	NA	NA	NA
CEBPD	ZNF788P	Inhibition	-0.820317	1	-0.820317	1	NA	NA	NA	NA
CREB5	BCL11A	Activation	0.741473	2.66667	0.754011	3	0.729974	2	0.740432	3
CREB5	BHLHE40	Activation	0.723664	2.33333	0.717703	3	0.664201	3	0.789088	1
CREB5	BHLHE41	Activation	0.71365	3	0.71365	3	NA	NA	NA	NA
CREB5	CASZ1	Activation	0.804575	1	0.804575	1	NA	NA	NA	NA
CREB5	CEBPD	Activation	0.847983	2.5	0.830219	3	NA	NA	0.865746	2
CREB5	E2F7	Inhibition	-0.799958	1.5	-0.789578	2	NA	NA	-0.810337	1
CREB5	EGR1	Activation	0.715933	2	0.699849	3	0.732017	1	NA	NA
CREB5	ETS1	Activation	0.702334	3	0.669855	3	NA	NA	0.734814	3
CREB5	ETS2	Activation	0.86587	3	0.86587	3	NA	NA	NA	NA
CREB5	ETV1	Activation	0.68994	3	0.68994	3	NA	NA	NA	NA
CREB5	FOXA3	Inhibition	-0.918028	1	-0.918028	1	NA	NA	NA	NA
CREB5	FOXH1	Inhibition	-0.791934	2.5	-0.793502	2	NA	NA	-0.790367	3
CREB5	FOXM1	Inhibition	-0.787679	2	-0.787679	2	NA	NA	NA	NA
CREB5	GATA3	Inhibition	-0.684547	2.66667	-0.717327	3	-0.666768	2	-0.669547	3
CREB5	HIF3A	Activation	0.84841	2.5	0.780609	3	NA	NA	0.916211	2
CREB5	HMGA1	Inhibition	-0.871555	2.5	-0.845673	2	NA	NA	-0.897437	3
CREB5	HOPX	Activation	0.717574	2	0.668781	3	NA	NA	0.766367	1
CREB5	HOXA1	Inhibition	-0.696618	3	-0.658183	3	NA	NA	-0.735052	3
CREB5	ID1	Inhibition	-0.751023	3	-0.706877	3	NA	NA	-0.795168	3
CREB5	ID3	Inhibition	-0.82546	3	-0.739268	3	NA	NA	-0.911652	3
CREB5	IRF2	Activation	0.825848	3	0.820208	3	NA	NA	0.831488	3
CREB5	IRF9	Activation	0.870547	2	0.870547	2	NA	NA	NA	NA
CREB5	IRX4	Activation	0.755367	3	0.755367	3	NA	NA	NA	NA
CREB5	JAZF1	Activation	0.801715	3	0.802114	3	NA	NA	0.801316	3
CREB5	KDM4C	Activation	0.728842	2	0.796157	2	NA	NA	0.661527	2
CREB5	LEF1	Inhibition	-0.723144	3	-0.632524	3	NA	NA	-0.813764	3
CREB5	MEIS2	Activation	0.651526	3	0.651526	3	NA	NA	NA	NA
CREB5	MSX1	Inhibition	-0.729849	3	-0.648232	3	NA	NA	-0.811467	3
CREB5	MYBL2	Inhibition	-0.845752	2	-0.845752	2	NA	NA	NA	NA
CREB5	MYCL	Inhibition	-0.840662	3	-0.840662	3	NA	NA	NA	NA
CREB5	NFIB	Activation	0.822419	1.66667	0.900217	1	0.675481	2	0.891558	2
CREB5	NFIC	Activation	0.797017	2	0.750088	3	NA	NA	0.843946	1
CREB5	NR3C1	Activation	0.849473	2	0.842324	3	NA	NA	0.856622	1
CREB5	NR6A1	Inhibition	-0.883101	3	-0.883101	3	NA	NA	NA	NA
CREB5	OVOL2	Inhibition	-0.761832	3	-0.761832	3	NA	NA	NA	NA
CREB5	PLAGL1	Activation	0.855467	3	0.855467	3	NA	NA	NA	NA
CREB5	POU2F3	Inhibition	-0.719749	3	-0.719749	3	NA	NA	NA	NA
CREB5	PRDM1	Inhibition	-0.736526	3	-0.776374	3	NA	NA	-0.696678	3
CREB5	PRDM16	Activation	0.848251	2.5	0.833319	3	NA	NA	0.863183	2
CREB5	RXRG	Activation	0.727913	1	0.727913	1	NA	NA	NA	NA
CREB5	SALL1	Inhibition	-0.79843	2	-0.82071	1	NA	NA	-0.776149	3
CREB5	SALL2	Inhibition	-0.81026	3	-0.823729	3	NA	NA	-0.796791	3
CREB5	SP6	Inhibition	-0.726135	3	-0.707754	3	NA	NA	-0.744517	3
CREB5	STAT3	Activation	0.788522	2.33333	0.783568	3	0.720457	1	0.861542	3
CREB5	STAT4	Activation	0.789903	3	0.764049	3	NA	NA	0.815757	3
CREB5	TBX18	Activation	0.903021	1	0.903021	1	NA	NA	NA	NA
CREB5	TCF25	Activation	0.909254	3	0.909254	3	NA	NA	NA	NA
CREB5	TFAP2C	Inhibition	-0.685221	2	-0.685221	2	NA	NA	NA	NA
CREB5	TP53	Inhibition	-0.692761	1.5	-0.721779	2	NA	NA	-0.663743	1
CREB5	WDHD1	Inhibition	-0.859998	1	-0.859998	1	NA	NA	NA	NA
CREB5	WT1	Activation	0.908275	2	0.908275	2	NA	NA	NA	NA
CREB5	ZEB1	Activation	0.836515	1.5	0.827547	2	NA	NA	0.845484	1
CREB5	ZEB2	Activation	0.64276	3	0.64276	3	NA	NA	NA	NA
CREB5	ZFP36L1	Activation	0.871217	2	0.871217	2	NA	NA	NA	NA
CREB5	ZNF101	Inhibition	-0.632199	1	-0.632199	1	NA	NA	NA	NA
CREB5	ZNF124	Inhibition	-0.757126	2.5	-0.742742	3	NA	NA	-0.771509	2
CREB5	ZNF215	Inhibition	-0.866637	2	-0.866637	2	NA	NA	NA	NA
CREB5	ZNF25	Activation	0.825653	2.5	0.800831	3	NA	NA	0.850476	2
CREB5	ZNF273	Inhibition	-0.862776	1.5	-0.869198	1	NA	NA	-0.856355	2
CREB5	ZNF385B	Activation	0.791121	3	0.791121	3	NA	NA	NA	NA
CREB5	ZNF436	Activation	0.856504	2.5	0.796652	3	NA	NA	0.916356	2
CREB5	ZNF611	Inhibition	-0.81832	3	-0.81832	3	NA	NA	NA	NA
CREB5	ZNF704	Activation	0.747457	3	0.747457	3	NA	NA	NA	NA
CREB5	ZNF724	Inhibition	-0.801029	1.5	-0.795046	1	NA	NA	-0.807012	2
CREB5	ZNF730	Inhibition	-0.831926	1	-0.831926	1	NA	NA	NA	NA
CREB5	ZNF90	Inhibition	-0.808189	1	-0.808189	1	NA	NA	NA	NA
DACH1	AHR	Activation	0.674274	3	0.674274	3	NA	NA	NA	NA
DACH1	ARID5B	Activation	0.754595	2.66667	0.795521	2	0.656626	3	0.811637	3
DACH1	BNC1	Activation	0.816296	2	0.816296	2	NA	NA	NA	NA
DACH1	CASZ1	Activation	0.768863	2	0.651247	1	0.796011	3	0.859332	2
DACH1	CEBPD	Activation	0.70312	2.5	0.687268	3	NA	NA	0.718972	2
DACH1	CREB5	Activation	0.743289	3	0.784738	3	NA	NA	0.70184	3
DACH1	E2F7	Inhibition	-0.765776	2.66667	-0.786973	2	-0.728732	3	-0.781622	3
DACH1	EOMES	Inhibition	-0.774759	2.33333	-0.805097	2	-0.768713	3	-0.750468	2
DACH1	EPAS1	Activation	0.814047	1	0.814047	1	NA	NA	NA	NA
DACH1	ESRRG	Activation	0.846863	2	0.794172	2	0.844899	2	0.901516	2
DACH1	ETS2	Activation	0.719025	3	0.64121	3	NA	NA	0.79684	3
DACH1	ETV1	Activation	0.754524	3	0.752666	3	0.698281	3	0.812625	3
DACH1	EVX1	Inhibition	-0.702506	3	-0.692653	3	-0.663126	3	-0.751738	3
DACH1	FOSL1	Inhibition	-0.714742	1.5	-0.752938	1	-0.676546	2	NA	NA
DACH1	FOSL2	Activation	0.748402	1	0.797265	1	NA	NA	0.699539	1
DACH1	FOXA3	Inhibition	-0.757819	1.5	-0.690855	1	NA	NA	-0.824783	2
DACH1	FOXF1	Activation	0.697138	2	0.697138	2	NA	NA	NA	NA
DACH1	FOXH1	Inhibition	-0.719199	2.5	-0.664809	2	NA	NA	-0.773589	3
DACH1	FOXM1	Inhibition	-0.761158	2.66667	-0.679845	3	-0.804258	2	-0.799371	3
DACH1	GATA4	Activation	0.851553	1	0.871378	1	0.831727	1	NA	NA
DACH1	HMBOX1	Activation	0.857813	2.33333	0.84415	3	0.839965	1	0.889324	3
DACH1	HMGA1	Inhibition	-0.742064	2.66667	-0.693216	3	-0.720944	2	-0.812031	3
DACH1	HOXB4	Activation	0.792608	1.5	0.78272	2	0.802496	1	NA	NA
DACH1	IRF9	Activation	0.757108	3	0.757108	3	NA	NA	NA	NA
DACH1	JUN	Activation	0.840227	2	0.803583	3	NA	NA	0.876871	1
DACH1	KDM4C	Activation	0.71924	3	0.784566	3	0.646755	3	0.726399	3
DACH1	LHX1	Inhibition	-0.797545	2.66667	-0.804809	2	-0.747103	3	-0.840725	3
DACH1	MAF	Activation	0.763189	1.66667	0.701073	2	0.765406	1	0.823089	2
DACH1	MEF2A	Activation	0.798969	2.5	0.738811	3	0.859127	2	NA	NA
DACH1	MESP1	Inhibition	-0.666444	3	-0.666444	3	NA	NA	NA	NA
DACH1	MIS18BP1	Inhibition	-0.817546	2.33333	-0.76044	2	-0.822556	2	-0.869642	3
DACH1	MITF	Activation	0.855695	2.66667	0.84535	2	0.832107	3	0.889629	3
DACH1	MYBL2	Inhibition	-0.80406	3	-0.798052	3	-0.782888	3	-0.831242	3
DACH1	MYCL	Inhibition	-0.666757	2	-0.659321	3	NA	NA	-0.674194	1
DACH1	MYRF	Activation	0.865224	1.5	0.854114	1	NA	NA	0.876333	2
DACH1	NFATC2	Activation	0.794039	2.33333	0.655179	2	0.843533	3	0.883405	2
DACH1	NFIA	Activation	0.710751	3	0.677909	3	0.657079	3	0.797264	3
DACH1	NFIB	Activation	0.746407	3	0.748001	3	NA	NA	0.744813	3
DACH1	NKX2-5	Activation	0.806537	2.5	0.755821	3	0.857253	2	NA	NA
DACH1	NR6A1	Inhibition	-0.754144	3	-0.698396	3	-0.744575	3	-0.81946	3
DACH1	OTX2	Inhibition	-0.812662	2.66667	-0.772275	2	-0.769804	3	-0.895909	3
DACH1	OVOL2	Inhibition	-0.630111	3	-0.630111	3	NA	NA	NA	NA
DACH1	PLAGL1	Activation	0.802507	2.66667	0.76487	3	0.7844	3	0.858252	2
DACH1	POU5F1	Inhibition	-0.867356	1	-0.867356	1	NA	NA	NA	NA
DACH1	PPARG	Activation	0.685484	1	0.685484	1	NA	NA	NA	NA
DACH1	PRDM1	Inhibition	-0.735052	3	-0.699547	3	NA	NA	-0.770556	3
DACH1	RARG	Inhibition	-0.768879	1.33333	-0.669627	1	-0.805655	2	-0.831355	1
DACH1	RXRG	Activation	0.674015	2	0.660328	2	0.687702	2	NA	NA
DACH1	SALL1	Inhibition	-0.788117	3	-0.780618	3	-0.722124	3	-0.861607	3
DACH1	SALL2	Inhibition	-0.746109	1.5	-0.721894	1	-0.770325	2	NA	NA
DACH1	SALL3	Inhibition	-0.754711	3	-0.785439	3	-0.723983	3	NA	NA
DACH1	SALL4	Inhibition	-0.731481	3	-0.7193	3	-0.673631	3	-0.801512	3
DACH1	SCAPER	Activation	0.755497	3	0.817755	3	0.69324	3	NA	NA
DACH1	SOX6	Activation	0.870994	1	0.860339	1	NA	NA	0.881648	1
DACH1	SP5	Inhibition	-0.739012	2.33333	-0.731337	2	-0.715615	3	-0.770085	2
DACH1	SRY	Inhibition	-0.718369	3	-0.718369	3	NA	NA	NA	NA
DACH1	TBX18	Activation	0.84322	2.5	0.81107	2	NA	NA	0.87537	3
DACH1	TBX3	Activation	0.738327	1	0.738327	1	NA	NA	NA	NA
DACH1	TBX5	Activation	0.834605	2.33333	0.843923	3	0.78269	3	0.877201	1
DACH1	TBXT	Inhibition	-0.686794	2.5	-0.717597	2	-0.655991	3	NA	NA
DACH1	TCF25	Activation	0.742852	3	0.698198	3	0.787507	3	NA	NA
DACH1	TERF1	Inhibition	-0.773987	2	-0.722509	2	-0.825465	2	NA	NA
DACH1	TGIF1	Inhibition	-0.755744	2.5	-0.731676	2	-0.779813	3	NA	NA
DACH1	TP53	Inhibition	-0.721181	1	-0.638029	1	-0.804332	1	NA	NA
DACH1	TRPS1	Activation	0.782984	2	0.773435	2	NA	NA	0.792533	2
DACH1	TSHZ3	Activation	0.68531	2.5	0.700462	2	NA	NA	0.670158	3
DACH1	WDHD1	Inhibition	-0.826722	1.66667	-0.756128	1	-0.819533	2	-0.904504	2
DACH1	WT1	Activation	0.835711	3	0.799195	3	NA	NA	0.872227	3
DACH1	ZBTB20	Activation	0.836379	2.66667	0.843002	3	0.837422	3	0.828712	2
DACH1	ZFHX3	Activation	0.810394	2.5	0.827944	2	0.792844	3	NA	NA
DACH1	ZFP36L1	Activation	0.815932	3	0.830029	3	0.746332	3	0.871437	3
DACH1	ZFP42	Inhibition	-0.817765	2.5	-0.777924	3	NA	NA	-0.857606	2
DACH1	ZFPM2	Activation	0.850924	2	0.850924	2	NA	NA	NA	NA
DACH1	ZIC2	Inhibition	-0.82773	1.5	-0.838951	1	-0.816508	2	NA	NA
DACH1	ZIC3	Inhibition	-0.782156	1.66667	-0.792244	1	-0.703107	3	-0.851117	1
DACH1	ZMAT3	Activation	0.722154	2	0.735533	2	0.692049	3	0.73888	1
DACH1	ZNF101	Inhibition	-0.682458	1	-0.682458	1	NA	NA	NA	NA
DACH1	ZNF121	Inhibition	-0.831276	2	-0.81213	2	-0.850422	2	NA	NA
DACH1	ZNF215	Inhibition	-0.776934	2	-0.70659	2	-0.805472	2	-0.81874	2
DACH1	ZNF273	Inhibition	-0.809749	2.33333	-0.799392	3	-0.783043	3	-0.846812	1
DACH1	ZNF385B	Activation	0.676462	2.66667	0.649854	3	0.643105	2	0.736427	3
DACH1	ZNF428	Activation	0.842573	2	0.861554	3	0.821111	1	0.845052	2
DACH1	ZNF436	Activation	0.760734	2.66667	0.738751	3	0.819562	2	0.723888	3
DACH1	ZNF589	Inhibition	-0.763276	2	-0.763276	2	NA	NA	NA	NA
DACH1	ZNF670	Inhibition	-0.830968	2.33333	-0.783389	3	-0.848149	2	-0.861367	2
DACH1	ZNF695	Inhibition	-0.822958	2.5	-0.790984	3	-0.854933	2	NA	NA
DACH1	ZNF704	Activation	0.833863	2	0.815132	3	0.848015	1	0.838443	2
DACH1	ZNF721	Inhibition	-0.834738	1	-0.834738	1	NA	NA	NA	NA
DACH1	ZNF724	Inhibition	-0.830497	1.66667	-0.835973	1	-0.822511	1	-0.833006	3
DACH1	ZNF730	Inhibition	-0.799329	2	-0.739117	2	-0.826758	2	-0.832114	2
DACH1	ZNF732	Inhibition	-0.814781	2	-0.837304	2	-0.796992	1	-0.810047	3
DACH1	ZNF788P	Inhibition	-0.825365	1.66667	-0.837843	2	-0.776757	2	-0.861496	1
DACH1	ZNF90	Inhibition	-0.839462	2.33333	-0.806888	1	-0.846674	3	-0.864824	3
DACH1	ZNF93	Inhibition	-0.870618	2	-0.852431	2	-0.837043	2	-0.922381	2
DDIT3	AHR	Activation	0.693762	3	0.703227	3	0.69996	3	0.678099	3
DDIT3	ARID5B	Activation	0.765445	2	0.63007	2	0.818974	3	0.847291	1
DDIT3	CAMTA2	Activation	0.706051	2.33333	0.707592	2	0.752056	3	0.658507	2
DDIT3	CARHSP1	Inhibition	-0.78809	2	-0.72061	3	NA	NA	-0.85557	1
DDIT3	CASZ1	Activation	0.766107	2.33333	0.645174	3	0.878529	3	0.774619	1
DDIT3	CDX2	Inhibition	-0.680284	3	-0.646219	3	NA	NA	-0.714348	3
DDIT3	CREB5	Activation	0.630674	3	0.630674	3	NA	NA	NA	NA
DDIT3	DACH1	Activation	0.738999	1.66667	0.792334	2	0.681397	1	0.743268	2
DDIT3	E2F7	Inhibition	-0.756116	3	-0.630438	3	-0.860948	3	-0.776963	3
DDIT3	EOMES	Inhibition	-0.754084	2.33333	-0.783567	2	-0.751105	2	-0.72758	3
DDIT3	EPAS1	Activation	0.781037	2	0.781037	2	NA	NA	NA	NA
DDIT3	ESRRG	Activation	0.829474	2	0.768584	2	0.902988	3	0.81685	1
DDIT3	ETV4	Inhibition	-0.811866	1	-0.811866	1	NA	NA	NA	NA
DDIT3	EVX1	Inhibition	-0.737657	2.66667	-0.755284	2	-0.703839	3	-0.753848	3
DDIT3	FOSL2	Activation	0.739109	2	0.739109	2	NA	NA	NA	NA
DDIT3	FOXA3	Inhibition	-0.740657	2.33333	-0.6609	3	-0.772816	1	-0.788254	3
DDIT3	FOXC1	Inhibition	-0.735168	3	-0.673376	3	-0.79696	3	NA	NA
DDIT3	FOXH1	Inhibition	-0.748762	2.66667	-0.69873	2	-0.751859	3	-0.795695	3
DDIT3	FOXP1	Activation	0.785376	1	0.762662	1	NA	NA	0.808091	1
DDIT3	GSC	Inhibition	-0.703022	1.5	-0.693894	1	NA	NA	-0.712149	2
DDIT3	HAND2	Activation	0.825388	1.33333	0.819749	1	0.859697	1	0.796716	2
DDIT3	HMBOX1	Activation	0.788758	2	0.705834	2	0.840575	2	0.819867	2
DDIT3	HOXA1	Inhibition	-0.703237	3	-0.66156	3	-0.65853	3	-0.789621	3
DDIT3	HOXB3	Activation	0.796768	1	0.796768	1	NA	NA	NA	NA
DDIT3	ID3	Inhibition	-0.724763	3	-0.634098	3	-0.755277	3	-0.784914	3
DDIT3	KDM4C	Activation	0.751813	3	0.687521	3	0.839816	3	0.728102	3
DDIT3	LHX1	Inhibition	-0.822057	2.66667	-0.846839	3	-0.805777	2	-0.813556	3
DDIT3	MAF	Activation	0.649509	2	0.649509	2	NA	NA	NA	NA
DDIT3	MECOM	Activation	0.713401	1	0.654044	1	0.693873	1	0.792284	1
DDIT3	MEF2C	Activation	0.820749	2	0.820749	2	NA	NA	NA	NA
DDIT3	MESP1	Inhibition	-0.6672	3	-0.6672	3	NA	NA	NA	NA
DDIT3	MESP2	Inhibition	-0.714294	2.66667	-0.790265	2	-0.650564	3	-0.702053	3
DDIT3	MIS18BP1	Inhibition	-0.78402	2.66667	-0.715376	3	-0.810332	2	-0.826352	3
DDIT3	MITF	Activation	0.833814	3	0.783366	3	0.892483	3	0.825593	3
DDIT3	MIXL1	Inhibition	-0.71921	1	-0.71921	1	NA	NA	NA	NA
DDIT3	MYBL2	Inhibition	-0.777496	2	-0.647622	2	-0.870141	3	-0.814727	1
DDIT3	MYRF	Activation	0.747253	1.5	0.683648	2	NA	NA	0.810859	1
DDIT3	NFE2L3	Inhibition	-0.741398	1	-0.741398	1	NA	NA	NA	NA
DDIT3	NKX2-5	Activation	0.783698	2	0.691299	3	0.860312	2	0.799483	1
DDIT3	NR6A1	Inhibition	-0.77068	2.66667	-0.652613	3	-0.866766	3	-0.792662	2
DDIT3	OTX2	Inhibition	-0.805078	2	-0.735536	1	-0.813621	2	-0.866076	3
DDIT3	PBX1	Activation	0.734409	1	0.734409	1	NA	NA	NA	NA
DDIT3	PITX2	Activation	0.7367	3	0.710433	3	NA	NA	0.762967	3
DDIT3	POU5F1	Inhibition	-0.821083	1	-0.787628	1	-0.854538	1	NA	NA
DDIT3	RARB	Activation	0.849727	1	0.849727	1	NA	NA	NA	NA
DDIT3	RARG	Inhibition	-0.73493	2	-0.723069	2	-0.79129	1	-0.690431	3
DDIT3	SALL1	Inhibition	-0.808578	3	-0.768216	3	-0.843258	3	-0.81426	3
DDIT3	SALL3	Inhibition	-0.775635	2	-0.794464	3	NA	NA	-0.756807	1
DDIT3	SALL4	Inhibition	-0.778173	3	-0.679437	3	-0.824674	3	-0.830408	3
DDIT3	SCAPER	Activation	0.760357	1.66667	0.680246	1	0.831574	3	0.76925	1
DDIT3	SMAD9	Activation	0.841984	1	0.841984	1	NA	NA	NA	NA
DDIT3	SNAI1	Inhibition	-0.683481	1.5	-0.634281	2	-0.73268	1	NA	NA
DDIT3	SOX6	Activation	0.708016	1.5	0.683033	2	0.732998	1	NA	NA
DDIT3	SP5	Inhibition	-0.769359	2.33333	-0.797557	2	-0.738639	2	-0.771881	3
DDIT3	TBX18	Activation	0.738876	2.66667	0.646521	3	0.742875	2	0.827231	3
DDIT3	TBX2	Activation	0.747274	2	0.676592	3	0.809555	1	0.755676	2
DDIT3	TBX5	Activation	0.826387	3	0.762145	3	0.863619	3	0.853397	3
DDIT3	TBXT	Inhibition	-0.806764	2	-0.806764	2	NA	NA	NA	NA
DDIT3	TCF19	Inhibition	-0.734086	1	-0.734086	1	NA	NA	NA	NA
DDIT3	TGIF1	Inhibition	-0.812471	2	-0.707729	1	-0.878115	2	-0.851568	3
DDIT3	TRPS1	Activation	0.72642	2	0.705228	2	NA	NA	0.747611	2
DDIT3	TSHZ2	Activation	0.799443	1.33333	0.741864	2	0.878232	1	0.778233	1
DDIT3	TSHZ3	Inhibition	-0.0337215	2.5	0.635344	3	-0.702787	2	NA	NA
DDIT3	VENTX	Inhibition	-0.768799	2	-0.669364	3	-0.769763	2	-0.867269	1
DDIT3	WDHD1	Inhibition	-0.799863	2.33333	-0.722457	3	-0.85514	2	-0.821992	2
DDIT3	ZBTB20	Activation	0.777102	2	0.648522	2	0.886247	3	0.796538	1
DDIT3	ZFHX3	Activation	0.714523	2.5	0.66368	2	0.765366	3	NA	NA
DDIT3	ZFP36L1	Activation	0.793922	3	0.686512	3	0.865065	3	0.830189	3
DDIT3	ZFPM2	Activation	0.785987	2	0.752415	3	0.81956	1	NA	NA
DDIT3	ZIC2	Inhibition	-0.848894	1.33333	-0.832899	1	-0.882439	1	-0.831344	2
DDIT3	ZIC3	Inhibition	-0.803947	3	-0.788795	3	-0.795404	3	-0.82764	3
DDIT3	ZIC5	Inhibition	-0.815653	1.5	-0.789293	1	-0.842012	2	NA	NA
DDIT3	ZMAT3	Activation	0.677225	3	0.635291	3	0.71916	3	NA	NA
DDIT3	ZNF121	Inhibition	-0.766944	1	-0.701257	1	-0.832631	1	NA	NA
DDIT3	ZNF273	Inhibition	-0.779085	2.33333	-0.678718	2	-0.859835	3	-0.798702	2
DDIT3	ZNF428	Activation	0.745113	3	0.745113	3	NA	NA	NA	NA
DDIT3	ZNF467	Activation	0.722594	1	0.655716	1	NA	NA	0.789471	1
DDIT3	ZNF503	Activation	0.832136	1	0.765375	1	0.898898	1	NA	NA
DDIT3	ZNF649	Inhibition	-0.785505	2	-0.785505	2	NA	NA	NA	NA
DDIT3	ZNF670	Inhibition	-0.807566	3	-0.701216	3	-0.858603	3	-0.862878	3
DDIT3	ZNF695	Inhibition	-0.790979	1.33333	-0.69071	2	-0.844055	1	-0.838172	1
DDIT3	ZNF721	Inhibition	-0.740023	2	-0.771216	3	-0.70883	1	NA	NA
DDIT3	ZNF724	Inhibition	-0.810459	3	-0.737386	3	-0.854977	3	-0.839013	3
DDIT3	ZNF730	Inhibition	-0.749578	2.66667	-0.633806	2	-0.827917	3	-0.78701	3
DDIT3	ZNF732	Inhibition	-0.798894	3	-0.769585	3	-0.828203	3	NA	NA
DDIT3	ZNF788P	Inhibition	-0.807756	2.33333	-0.747283	3	-0.811379	2	-0.864605	2
DDIT3	ZNF90	Inhibition	-0.813601	2	-0.743069	2	-0.854048	2	-0.843686	2
DDIT3	ZNF93	Inhibition	-0.794891	2.66667	-0.741466	3	-0.781933	3	-0.861274	2
DDIT3	ZSCAN10	Inhibition	-0.777434	1	-0.759166	1	-0.795701	1	NA	NA
E2F7	ARID5B	Inhibition	-0.854233	2.66667	-0.797973	3	-0.885811	3	-0.878914	2
E2F7	ASH1L	Inhibition	-0.816535	2.66667	-0.865535	2	-0.783174	3	-0.800897	3
E2F7	BCL11A	Inhibition	-0.741453	3	-0.675162	3	-0.697761	3	-0.851437	3
E2F7	BHLHE41	Inhibition	-0.756769	3	-0.756769	3	NA	NA	NA	NA
E2F7	CASZ1	Inhibition	-0.867175	2	-0.851814	3	NA	NA	-0.882537	1
E2F7	CDX2	Activation	0.673634	3	0.673634	3	NA	NA	NA	NA
E2F7	CEBPD	Inhibition	-0.796503	1.33333	-0.767073	1	-0.740122	1	-0.882316	2
E2F7	CREB5	Inhibition	-0.798258	2.5	-0.77742	2	NA	NA	-0.819095	3
E2F7	EGR1	Inhibition	-0.709108	3	-0.709108	3	NA	NA	NA	NA
E2F7	ETS2	Inhibition	-0.77562	3	-0.796569	3	-0.721691	3	-0.808599	3
E2F7	ETV1	Inhibition	-0.70945	1.66667	-0.635508	2	-0.763782	2	-0.729061	1
E2F7	GATA3	Activation	0.796246	3	0.756313	3	NA	NA	0.836179	3
E2F7	GRHL2	Activation	0.761194	2	0.698396	1	NA	NA	0.823993	3
E2F7	HIF3A	Inhibition	-0.834893	2.33333	-0.86474	2	-0.808776	2	-0.831164	3
E2F7	HOPX	Inhibition	-0.648729	2	-0.638168	1	NA	NA	-0.65929	3
E2F7	HOXA1	Activation	0.739972	3	0.752757	3	0.735426	3	0.731734	3
E2F7	ID1	Activation	0.704045	3	0.638989	3	NA	NA	0.769101	3
E2F7	ID3	Activation	0.758091	3	0.773197	3	0.712503	3	0.788573	3
E2F7	IRF2	Inhibition	-0.774859	2	-0.808295	3	-0.678096	2	-0.838187	1
E2F7	IRF9	Inhibition	-0.807842	2.33333	-0.828678	1	-0.710224	3	-0.884625	3
E2F7	IRX4	Inhibition	-0.87649	2	-0.866039	2	-0.883421	3	-0.880008	1
E2F7	JAZF1	Inhibition	-0.832556	2.33333	-0.857848	3	-0.752952	3	-0.886868	1
E2F7	JUN	Inhibition	-0.790298	2.33333	-0.855148	2	-0.72951	3	-0.786236	2
E2F7	JUNB	Inhibition	-0.711874	2.33333	-0.652518	3	-0.716924	3	-0.766179	1
E2F7	LHX1	Activation	0.692379	3	0.713688	3	0.689959	3	0.67349	3
E2F7	MEF2A	Inhibition	-0.867685	1.5	-0.905494	2	NA	NA	-0.829875	1
E2F7	MSX1	Activation	0.77142	3	0.757264	3	NA	NA	0.785576	3
E2F7	MXD1	Inhibition	-0.82265	1.5	-0.839172	2	NA	NA	-0.806128	1
E2F7	MYCL	Activation	0.828525	2.33333	0.891221	1	0.800182	3	0.794171	3
E2F7	MYCN	Activation	0.643695	3	0.643695	3	NA	NA	NA	NA
E2F7	NFIA	Inhibition	-0.86966	1.66667	-0.870279	3	-0.849995	1	-0.888705	1
E2F7	NFIC	Inhibition	-0.851481	2.66667	-0.870491	3	-0.841476	2	-0.842475	3
E2F7	NR3C1	Inhibition	-0.814598	2.66667	-0.813719	3	-0.753742	3	-0.876333	2
E2F7	NR6A1	Activation	0.894928	1.33333	0.86546	1	0.912604	1	0.906718	2
E2F7	OTX2	Activation	0.832551	2.66667	0.864021	3	0.825673	2	0.807961	3
E2F7	OVOL2	Activation	0.818336	2	0.842227	1	NA	NA	0.794445	3
E2F7	PLAGL1	Inhibition	-0.798197	1.33333	-0.737321	1	-0.859918	2	-0.797352	1
E2F7	POU2F3	Activation	0.671164	1	0.671164	1	NA	NA	NA	NA
E2F7	PRDM16	Inhibition	-0.786075	2.5	-0.771916	2	-0.800234	3	NA	NA
E2F7	SALL1	Activation	0.790483	3	0.71814	3	0.862827	3	NA	NA
E2F7	SALL2	Activation	0.818903	2.66667	0.839524	2	0.863232	3	0.753954	3
E2F7	SCAPER	Inhibition	-0.810156	2.5	-0.880408	2	NA	NA	-0.739905	3
E2F7	SP6	Activation	0.650269	3	0.652012	3	NA	NA	0.648526	3
E2F7	SRY	Activation	0.774824	2	0.774824	2	NA	NA	NA	NA
E2F7	STAT3	Inhibition	-0.825238	3	-0.835319	3	-0.778258	3	-0.862136	3
E2F7	STAT4	Inhibition	-0.749405	2	-0.773972	1	NA	NA	-0.724838	3
E2F7	TCF21	Inhibition	-0.740643	1	-0.740643	1	NA	NA	NA	NA
E2F7	TCF25	Inhibition	-0.81217	2.33333	-0.834836	2	-0.830781	2	-0.770893	3
E2F7	TSC22D3	Inhibition	-0.668115	3	-0.668115	3	NA	NA	NA	NA
E2F7	TSHZ2	Inhibition	-0.78746	1	-0.78746	1	NA	NA	NA	NA
E2F7	WT1	Inhibition	-0.814935	1	-0.814935	1	NA	NA	NA	NA
E2F7	ZBTB20	Inhibition	-0.831058	1	-0.835925	1	NA	NA	-0.826191	1
E2F7	ZEB1	Inhibition	-0.873442	3	-0.889906	3	NA	NA	-0.856977	3
E2F7	ZFP42	Activation	0.863939	3	0.871551	3	NA	NA	0.856326	3
E2F7	ZNF124	Activation	0.760433	2.66667	0.79522	3	0.730079	3	0.755999	2
E2F7	ZNF25	Inhibition	-0.810576	3	-0.832595	3	-0.847395	3	-0.751739	3
E2F7	ZNF428	Inhibition	-0.798966	1.5	-0.804813	1	NA	NA	-0.793119	2
E2F7	ZNF436	Inhibition	-0.891586	1.66667	-0.908345	1	-0.894031	1	-0.872383	3
E2F7	ZNF467	Inhibition	-0.696001	1.5	-0.681671	2	NA	NA	-0.710332	1
E2F7	ZNF611	Activation	0.717662	3	0.767739	3	0.72119	3	0.664056	3
E2F7	ZNF695	Activation	0.887356	1	0.889098	1	0.885614	1	NA	NA
E2F7	ZNF781	Inhibition	-0.711259	2	-0.691095	1	NA	NA	-0.731423	3
E2F7	ZNF90	Activation	0.823206	1	0.823206	1	NA	NA	NA	NA
EGR1	BHLHE41	Activation	0.731565	1	0.731565	1	NA	NA	NA	NA
EGR1	CARHSP1	Inhibition	-0.640923	1	-0.640923	1	NA	NA	NA	NA
EGR1	CASZ1	Activation	0.743269	2	0.743269	2	NA	NA	NA	NA
EGR1	CEBPD	Activation	0.736507	1	0.736507	1	NA	NA	NA	NA
EGR1	CREB5	Activation	0.755775	1	0.755775	1	NA	NA	NA	NA
EGR1	ETS2	Activation	0.661921	3	0.661921	3	NA	NA	NA	NA
EGR1	FOXA3	Inhibition	-0.798167	2	-0.798167	2	NA	NA	NA	NA
EGR1	FOXH1	Inhibition	-0.698181	1	-0.698181	1	NA	NA	NA	NA
EGR1	FOXM1	Inhibition	-0.658529	1	-0.658529	1	NA	NA	NA	NA
EGR1	GATA3	Inhibition	-0.726381	3	-0.726381	3	NA	NA	NA	NA
EGR1	HOPX	Activation	0.781104	3	0.781104	3	NA	NA	NA	NA
EGR1	ID1	Inhibition	-0.663913	3	-0.648675	3	-0.679151	3	NA	NA
EGR1	ID3	Inhibition	-0.663561	2	-0.663561	2	NA	NA	NA	NA
EGR1	IRF2	Activation	0.727017	1	0.727017	1	NA	NA	NA	NA
EGR1	IRF9	Activation	0.66093	2	0.66093	2	NA	NA	NA	NA
EGR1	JAZF1	Activation	0.678821	2	0.678821	2	NA	NA	NA	NA
EGR1	JUN	Activation	0.728402	1	0.728402	1	NA	NA	NA	NA
EGR1	JUNB	Activation	0.664021	3	0.664021	3	NA	NA	NA	NA
EGR1	LEF1	Inhibition	-0.68151	3	-0.68151	3	NA	NA	NA	NA
EGR1	LHX1	Inhibition	-0.680126	1	-0.680126	1	NA	NA	NA	NA
EGR1	MSX2	Inhibition	-0.644056	3	-0.644056	3	NA	NA	NA	NA
EGR1	MYCL	Inhibition	-0.691986	2	-0.691986	2	NA	NA	NA	NA
EGR1	MYCN	Inhibition	-0.648503	3	-0.648503	3	NA	NA	NA	NA
EGR1	NFIB	Activation	0.786933	2	0.786933	2	NA	NA	NA	NA
EGR1	NFIC	Activation	0.783201	3	0.783201	3	NA	NA	NA	NA
EGR1	NR3C1	Activation	0.763144	3	0.763144	3	NA	NA	NA	NA
EGR1	NR6A1	Inhibition	-0.78362	1	-0.78362	1	NA	NA	NA	NA
EGR1	PLAGL1	Activation	0.68073	3	0.68073	3	NA	NA	NA	NA
EGR1	PRDM16	Activation	0.751936	2	0.751936	2	NA	NA	NA	NA
EGR1	SALL1	Inhibition	-0.680893	1	-0.680893	1	NA	NA	NA	NA
EGR1	SALL2	Inhibition	-0.696058	3	-0.696058	3	NA	NA	NA	NA
EGR1	SKIL	Activation	0.645576	3	0.645576	3	NA	NA	NA	NA
EGR1	SP6	Inhibition	-0.766863	3	-0.766863	3	NA	NA	NA	NA
EGR1	STAT3	Activation	0.806812	3	0.806812	3	NA	NA	NA	NA
EGR1	STAT4	Activation	0.742266	1	0.742266	1	NA	NA	NA	NA
EGR1	TCF25	Activation	0.721876	2	0.721876	2	NA	NA	NA	NA
EGR1	TP53	Inhibition	-0.631609	2	-0.631609	2	NA	NA	NA	NA
EGR1	TSC22D3	Activation	0.63681	1	0.63681	1	NA	NA	NA	NA
EGR1	WDHD1	Inhibition	-0.745583	2	-0.745583	2	NA	NA	NA	NA
EGR1	ZIC3	Inhibition	-0.707381	1	-0.707381	1	NA	NA	NA	NA
EGR1	ZNF124	Inhibition	-0.720518	3	-0.720518	3	NA	NA	NA	NA
EGR1	ZNF25	Activation	0.738246	3	0.738246	3	NA	NA	NA	NA
EGR1	ZNF273	Inhibition	-0.693912	1	-0.693912	1	NA	NA	NA	NA
EGR1	ZNF611	Inhibition	-0.697482	2	-0.731737	3	NA	NA	-0.663227	1
EOMES	AHR	Inhibition	-0.748542	1.5	-0.714504	1	-0.782581	2	NA	NA
EOMES	ARID5B	Inhibition	-0.656374	1	-0.656374	1	NA	NA	NA	NA
EOMES	BCL11A	Inhibition	-0.741004	3	-0.822822	3	NA	NA	-0.659186	3
EOMES	CARHSP1	Activation	0.649031	1	0.649031	1	NA	NA	NA	NA
EOMES	CASZ1	Inhibition	-0.668344	1.66667	-0.659435	2	-0.682758	1	-0.66284	2
EOMES	CDX2	Activation	0.734258	1	0.705063	1	NA	NA	0.763452	1
EOMES	CEBPD	Inhibition	-0.642662	1	-0.642662	1	NA	NA	NA	NA
EOMES	CREB5	Inhibition	-0.747039	1	-0.747039	1	NA	NA	NA	NA
EOMES	DACH1	Inhibition	-0.631991	1	-0.631991	1	NA	NA	NA	NA
EOMES	E2F7	Activation	0.677391	2	0.690277	3	0.664505	1	NA	NA
EOMES	ETS2	Inhibition	-0.67953	2	-0.67953	2	NA	NA	NA	NA
EOMES	ETV1	Inhibition	-0.732708	2.66667	-0.773525	3	-0.673443	2	-0.751155	3
EOMES	EVX1	Activation	0.898467	1	0.908237	1	NA	NA	0.888697	1
EOMES	FOSL2	Inhibition	-0.691116	1	-0.691116	1	NA	NA	NA	NA
EOMES	FOXA3	Activation	0.690847	2	0.690847	2	NA	NA	NA	NA
EOMES	FOXC1	Activation	0.791255	1	0.683205	1	0.899304	1	NA	NA
EOMES	FOXH1	Activation	0.683269	1	0.646215	1	0.720323	1	NA	NA
EOMES	FOXM1	Activation	0.67202	1.5	0.630478	1	0.713562	2	NA	NA
EOMES	GATA3	Activation	0.730293	3	0.756662	3	0.74338	3	0.690839	3
EOMES	HEY1	Activation	0.0162473	2	-0.671179	1	0.703674	3	NA	NA
EOMES	HOXA1	Activation	0.694426	1.33333	0.684083	2	0.649503	1	0.749692	1
EOMES	ID3	Activation	0.67499	1	0.689444	1	0.660537	1	NA	NA
EOMES	IRF9	Inhibition	-0.784876	3	-0.784876	3	NA	NA	NA	NA
EOMES	ISL1	Activation	0.689317	3	0.63241	3	0.746224	3	NA	NA
EOMES	JAZF1	Inhibition	-0.701951	2.66667	-0.699197	3	-0.766509	2	-0.640148	3
EOMES	JUN	Inhibition	-0.675882	1	-0.675882	1	NA	NA	NA	NA
EOMES	KDM4C	Inhibition	-0.775069	1	-0.775069	1	NA	NA	NA	NA
EOMES	LHX1	Activation	0.923805	1	0.935713	1	NA	NA	0.911896	1
EOMES	MAF	Inhibition	-0.69359	1	-0.651892	1	NA	NA	-0.735289	1
EOMES	MEF2A	Inhibition	-0.646238	2	-0.646238	2	NA	NA	NA	NA
EOMES	MEIS1	Activation	0.660773	3	0.666667	3	0.65648	3	0.659172	3
EOMES	MESP1	Activation	0.825057	1	0.848172	1	NA	NA	0.801943	1
EOMES	MESP2	Activation	0.869275	1	0.878492	1	0.850627	1	0.878708	1
EOMES	MIS18BP1	Activation	0.692919	1	0.692185	1	NA	NA	0.693653	1
EOMES	MYBL2	Activation	0.666178	1	0.67631	1	0.656046	1	NA	NA
EOMES	MYCL	Activation	0.672378	3	0.672378	3	NA	NA	NA	NA
EOMES	MYCN	Activation	0.733514	1.66667	0.632655	2	0.789042	1	0.778846	2
EOMES	NFIA	Inhibition	-0.639486	3	-0.639486	3	NA	NA	NA	NA
EOMES	NFIB	Inhibition	-0.70543	3	-0.70543	3	NA	NA	NA	NA
EOMES	NR3C1	Inhibition	-0.686057	3	-0.722098	3	-0.650015	3	NA	NA
EOMES	NR6A1	Activation	0.67968	1.5	0.671438	2	0.687922	1	NA	NA
EOMES	OVOL2	Activation	0.647808	3	0.647808	3	NA	NA	NA	NA
EOMES	PITX2	Inhibition	-0.731263	2	-0.769582	2	NA	NA	-0.692944	2
EOMES	PRDM1	Activation	0.728448	2.66667	0.7195	2	0.771674	3	0.69417	3
EOMES	RARG	Activation	0.67812	1	0.681546	1	NA	NA	0.674695	1
EOMES	RXRG	Inhibition	-0.660293	3	-0.663006	3	-0.65758	3	NA	NA
EOMES	SALL1	Activation	0.811768	1.66667	0.875318	2	0.799994	1	0.759991	2
EOMES	SALL4	Activation	0.665254	1	0.674077	1	0.65643	1	NA	NA
EOMES	SOX6	Inhibition	-0.669509	1	-0.669509	1	NA	NA	NA	NA
EOMES	SP6	Activation	0.692531	2	0.683472	2	0.659001	3	0.735122	1
EOMES	TBX18	Inhibition	-0.699128	2	-0.717102	1	NA	NA	-0.681153	3
EOMES	TBX5	Inhibition	-0.731624	1	-0.731624	1	NA	NA	NA	NA
EOMES	TCF25	Inhibition	-0.682315	3	-0.682315	3	NA	NA	NA	NA
EOMES	TSHZ3	Inhibition	-0.747477	1.5	-0.769972	1	NA	NA	-0.724982	2
EOMES	VENTX	Activation	0.722728	1	0.740019	1	NA	NA	0.705436	1
EOMES	WDHD1	Activation	0.697277	1.66667	0.695694	2	0.690627	1	0.70551	2
EOMES	WT1	Inhibition	-0.672619	3	-0.698424	3	NA	NA	-0.646814	3
EOMES	ZBTB20	Inhibition	-0.708706	1	-0.71461	1	-0.671029	1	-0.740478	1
EOMES	ZFP36L1	Inhibition	-0.687777	1	-0.6828	1	-0.692754	1	NA	NA
EOMES	ZIC3	Activation	0.83873	1	0.851886	1	0.821108	1	0.843196	1
EOMES	ZMAT3	Inhibition	-0.733888	1	-0.733888	1	NA	NA	NA	NA
EOMES	ZMAT4	Inhibition	-0.696944	3	-0.696944	3	NA	NA	NA	NA
EOMES	ZNF215	Activation	0.698508	3	0.750283	3	NA	NA	0.646732	3
EOMES	ZNF273	Activation	0.662095	1	0.662095	1	NA	NA	NA	NA
EOMES	ZNF428	Inhibition	-0.65894	2	-0.65894	2	NA	NA	NA	NA
EOMES	ZNF611	Activation	0.728455	2.66667	0.716915	2	0.764263	3	0.704186	3
EOMES	ZNF670	Activation	0.704364	1	0.677526	1	0.731202	1	NA	NA
EOMES	ZNF695	Activation	0.656932	1	0.65996	1	0.653903	1	NA	NA
EOMES	ZNF724	Activation	0.651016	1	0.651016	1	NA	NA	NA	NA
EOMES	ZNF730	Activation	0.658862	2.5	0.648147	3	NA	NA	0.669576	2
EOMES	ZNF732	Activation	0.705832	2	0.740401	1	NA	NA	0.671263	3
EPAS1	AHR	Activation	0.720263	2	0.720263	2	NA	NA	NA	NA
EPAS1	ARID5B	Activation	0.703553	3	0.703553	3	NA	NA	NA	NA
EPAS1	BNC1	Activation	0.711778	2	0.723794	2	NA	NA	0.699761	2
EPAS1	CARHSP1	Inhibition	-0.737513	3	-0.737513	3	NA	NA	NA	NA
EPAS1	CEBPD	Activation	0.658647	2	0.658647	2	NA	NA	NA	NA
EPAS1	CREB5	Activation	0.772218	3	0.772218	3	NA	NA	NA	NA
EPAS1	E2F7	Inhibition	-0.634752	2	-0.634752	2	NA	NA	NA	NA
EPAS1	EOMES	Inhibition	-0.686249	1	-0.686249	1	NA	NA	NA	NA
EPAS1	ESRRG	Activation	0.654433	1	0.654433	1	NA	NA	NA	NA
EPAS1	ETV1	Activation	0.77268	3	0.76119	3	0.784169	3	NA	NA
EPAS1	ETV4	Inhibition	-0.745921	1	-0.745921	1	NA	NA	NA	NA
EPAS1	FOXP1	Activation	0.710809	3	0.710809	3	NA	NA	NA	NA
EPAS1	HMBOX1	Activation	0.748343	3	0.748343	3	NA	NA	NA	NA
EPAS1	IRF9	Activation	0.786407	3	0.786407	3	NA	NA	NA	NA
EPAS1	JUN	Activation	0.688424	3	0.688424	3	NA	NA	NA	NA
EPAS1	KDM4C	Activation	0.72065	3	0.72065	3	NA	NA	NA	NA
EPAS1	LHX1	Inhibition	-0.713047	1	-0.713047	1	NA	NA	NA	NA
EPAS1	MESP2	Inhibition	-0.634618	1	-0.634618	1	NA	NA	NA	NA
EPAS1	MIS18BP1	Inhibition	-0.676004	3	-0.676004	3	NA	NA	NA	NA
EPAS1	MITF	Activation	0.71833	1	0.71833	1	NA	NA	NA	NA
EPAS1	MYBL2	Inhibition	-0.655927	3	-0.655927	3	NA	NA	NA	NA
EPAS1	NFIA	Activation	0.647915	3	0.647915	3	NA	NA	NA	NA
EPAS1	NFIB	Activation	0.70775	3	0.70775	3	NA	NA	NA	NA
EPAS1	NKX2-5	Activation	0.644392	3	0.644392	3	NA	NA	NA	NA
EPAS1	PLAGL1	Activation	0.732753	3	0.732753	3	NA	NA	NA	NA
EPAS1	SALL1	Inhibition	-0.692401	3	-0.692401	3	NA	NA	NA	NA
EPAS1	SALL3	Inhibition	-0.707582	1	-0.707582	1	NA	NA	NA	NA
EPAS1	SCAPER	Activation	0.687296	2	0.687296	2	NA	NA	NA	NA
EPAS1	TBX18	Activation	0.743693	3	0.743693	3	NA	NA	NA	NA
EPAS1	TBX5	Activation	0.729529	2	0.729529	2	NA	NA	NA	NA
EPAS1	TBXT	Inhibition	-0.664144	1	-0.664144	1	NA	NA	NA	NA
EPAS1	TCF25	Activation	0.642458	2	0.642458	2	NA	NA	NA	NA
EPAS1	TSHZ3	Activation	0.719931	3	0.719931	3	NA	NA	NA	NA
EPAS1	WDHD1	Inhibition	-0.70307	3	-0.70307	3	NA	NA	NA	NA
EPAS1	WT1	Activation	0.724228	2	0.724228	2	NA	NA	NA	NA
EPAS1	ZBTB16	Activation	0.700387	1	0.700387	1	NA	NA	NA	NA
EPAS1	ZBTB20	Activation	0.741166	3	0.741166	3	NA	NA	NA	NA
EPAS1	ZFHX3	Activation	0.7382	2.33333	0.774433	3	0.707965	1	0.732202	3
EPAS1	ZFP36L1	Activation	0.713271	3	0.713271	3	NA	NA	NA	NA
EPAS1	ZFP42	Inhibition	-0.67434	3	-0.67434	3	NA	NA	NA	NA
EPAS1	ZFPM2	Activation	0.692944	2.5	0.731491	3	NA	NA	0.654397	2
EPAS1	ZIC5	Inhibition	-0.745246	1	-0.745246	1	NA	NA	NA	NA
EPAS1	ZMAT3	Activation	0.68311	3	0.68311	3	NA	NA	NA	NA
EPAS1	ZNF121	Inhibition	-0.755005	2	-0.755005	2	NA	NA	NA	NA
EPAS1	ZNF215	Inhibition	-0.638122	3	-0.638122	3	NA	NA	NA	NA
EPAS1	ZNF273	Inhibition	-0.747018	1	-0.747018	1	NA	NA	NA	NA
EPAS1	ZNF428	Activation	0.753586	3	0.753586	3	NA	NA	NA	NA
EPAS1	ZNF670	Inhibition	-0.695721	2	-0.695721	2	NA	NA	NA	NA
EPAS1	ZNF695	Inhibition	-0.658995	3	-0.658995	3	NA	NA	NA	NA
EPAS1	ZNF704	Activation	0.659528	2	0.659528	2	NA	NA	NA	NA
EPAS1	ZNF724	Inhibition	-0.681838	1	-0.681838	1	NA	NA	NA	NA
EPAS1	ZNF732	Inhibition	-0.730264	1	-0.730264	1	NA	NA	NA	NA
EPAS1	ZNF90	Inhibition	-0.663375	1	-0.647671	1	-0.679078	1	NA	NA
EPAS1	ZNF93	Inhibition	-0.710363	3	-0.710363	3	NA	NA	NA	NA
EPAS1	ZSCAN10	Inhibition	-0.742098	1	-0.742098	1	NA	NA	NA	NA
ESRRG	AHR	Activation	0.646022	1	0.646022	1	NA	NA	NA	NA
ESRRG	ARID5B	Activation	0.907926	3	0.902883	3	0.91994	3	0.900956	3
ESRRG	ASH1L	Activation	0.824957	1.66667	0.86915	1	0.858102	3	0.747618	1
ESRRG	BCL11A	Activation	0.773011	3	0.739565	3	0.716638	3	0.86283	3
ESRRG	BHLHE40	Activation	0.793228	3	0.836865	3	0.790326	3	0.752492	3
ESRRG	BHLHE41	Activation	0.81315	3	0.81315	3	NA	NA	NA	NA
ESRRG	CAMTA2	Activation	0.783438	1	0.783438	1	NA	NA	NA	NA
ESRRG	CASZ1	Activation	0.890385	2.5	0.882948	3	NA	NA	0.897821	2
ESRRG	CDX2	Inhibition	-0.688006	2.5	-0.701698	3	NA	NA	-0.674314	2
ESRRG	CEBPD	Activation	0.814843	3	0.85687	3	0.761718	3	0.825941	3
ESRRG	CREB5	Activation	0.829559	2	0.860433	1	NA	NA	0.798686	3
ESRRG	EGR1	Activation	0.797364	2	0.797364	2	NA	NA	NA	NA
ESRRG	ETS2	Activation	0.836713	3	0.859984	3	0.77526	3	0.874895	3
ESRRG	ETV1	Activation	0.756338	3	0.71749	3	0.737161	3	0.814363	3
ESRRG	EVX1	Inhibition	-0.654302	1.5	-0.668273	1	NA	NA	-0.640332	2
ESRRG	FOXA3	Inhibition	-0.878607	1	-0.886974	1	NA	NA	-0.870241	1
ESRRG	FOXH1	Inhibition	-0.862234	2.66667	-0.826359	2	-0.878412	3	-0.88193	3
ESRRG	FOXM1	Inhibition	-0.895427	1	-0.865708	1	-0.932321	1	-0.888253	1
ESRRG	GATA3	Inhibition	-0.783341	3	-0.78417	3	-0.679441	3	-0.886411	3
ESRRG	HIF3A	Activation	0.834192	2.66667	0.840093	3	0.867048	3	0.795436	2
ESRRG	HMGA1	Inhibition	-0.91968	2.33333	-0.926477	3	-0.931136	1	-0.901426	3
ESRRG	HOXA1	Inhibition	-0.784205	3	-0.767133	3	-0.740748	3	-0.844733	3
ESRRG	ID1	Inhibition	-0.657789	3	-0.665769	3	NA	NA	-0.649808	3
ESRRG	ID3	Inhibition	-0.796027	3	-0.802158	3	-0.76303	3	-0.822894	3
ESRRG	IRF2	Activation	0.819037	3	0.852797	3	0.784264	3	0.820049	3
ESRRG	IRF9	Activation	0.779514	2.66667	0.82952	3	0.741153	3	0.767871	2
ESRRG	IRX4	Activation	0.885376	3	0.8292	3	0.941553	3	NA	NA
ESRRG	JAZF1	Activation	0.861853	3	0.85984	3	0.847439	3	0.87828	3
ESRRG	JUN	Activation	0.873001	1.66667	0.89278	1	0.817139	3	0.909082	1
ESRRG	KDM4C	Activation	0.85669	3	0.867554	3	0.904924	3	0.797593	3
ESRRG	LEF1	Inhibition	-0.713287	3	-0.694576	3	-0.733565	3	-0.71172	3
ESRRG	LHX1	Inhibition	-0.806056	2.33333	-0.858931	2	-0.741534	3	-0.817703	2
ESRRG	MAF	Activation	0.830315	2.5	0.821722	3	NA	NA	0.838908	2
ESRRG	MEF2A	Activation	0.930028	1	0.930028	1	NA	NA	NA	NA
ESRRG	MESP2	Inhibition	-0.691917	1	-0.691917	1	NA	NA	NA	NA
ESRRG	MSX1	Inhibition	-0.787361	3	-0.717808	3	NA	NA	-0.856914	3
ESRRG	MXD1	Activation	0.826258	2.5	0.844332	3	NA	NA	0.808183	2
ESRRG	MYCL	Inhibition	-0.826603	2.66667	-0.85919	3	-0.842566	2	-0.778052	3
ESRRG	MYCN	Inhibition	-0.740288	3	-0.737388	3	NA	NA	-0.743189	3
ESRRG	NFIA	Activation	0.910571	2.66667	0.922178	3	0.895476	2	0.914058	3
ESRRG	NFIB	Activation	0.873253	3	0.940257	3	0.802155	3	0.877348	3
ESRRG	NFIC	Activation	0.864532	2.66667	0.877253	3	0.894927	3	0.821415	2
ESRRG	NR3C1	Activation	0.830571	2.66667	0.85813	3	0.750018	3	0.883565	2
ESRRG	NR6A1	Inhibition	-0.932754	2.33333	-0.929214	1	-0.948746	3	-0.920303	3
ESRRG	OVOL2	Inhibition	-0.799755	2	-0.799755	2	NA	NA	NA	NA
ESRRG	PBX1	Activation	0.697313	1	0.697313	1	NA	NA	NA	NA
ESRRG	PITX2	Activation	0.758925	3	0.718396	3	NA	NA	0.799455	3
ESRRG	PLAGL1	Activation	0.847713	2.5	0.800688	3	0.894738	2	NA	NA
ESRRG	POU2F3	Inhibition	-0.711399	1	-0.711399	1	NA	NA	NA	NA
ESRRG	PRDM1	Inhibition	-0.789577	3	-0.737107	3	-0.763156	3	-0.868468	3
ESRRG	PRDM16	Activation	0.811974	2.33333	0.782092	3	0.850729	3	0.803102	1
ESRRG	SALL1	Inhibition	-0.917701	3	-0.877696	3	-0.938195	3	-0.937212	3
ESRRG	SALL2	Inhibition	-0.921588	3	-0.90539	3	-0.937785	3	NA	NA
ESRRG	SALL3	Inhibition	-0.809189	1	-0.849899	1	-0.768479	1	NA	NA
ESRRG	SALL4	Inhibition	-0.914104	1.5	-0.938826	2	NA	NA	-0.889382	1
ESRRG	SP5	Inhibition	-0.749171	1	-0.795286	1	-0.675065	1	-0.777163	1
ESRRG	SP6	Inhibition	-0.750806	3	-0.763652	3	-0.712447	3	-0.776319	3
ESRRG	SRY	Inhibition	-0.816128	2	-0.816128	2	NA	NA	NA	NA
ESRRG	STAT3	Activation	0.828069	3	0.857738	3	0.829747	3	0.796723	3
ESRRG	STAT4	Activation	0.700882	2.5	0.753639	3	NA	NA	0.648125	2
ESRRG	TCF25	Activation	0.88801	2	0.871277	3	0.904742	1	NA	NA
ESRRG	TFAP2C	Inhibition	-0.786625	1.66667	-0.675784	1	-0.792511	1	-0.891581	3
ESRRG	TSHZ3	Activation	0.749074	1.5	0.751793	1	NA	NA	0.746354	2
ESRRG	VENTX	Inhibition	-0.783834	1.5	-0.674401	1	NA	NA	-0.893266	2
ESRRG	WT1	Activation	0.896318	1.5	0.869534	2	NA	NA	0.923101	1
ESRRG	ZEB1	Activation	0.931887	3	0.931887	3	NA	NA	NA	NA
ESRRG	ZFP42	Inhibition	-0.933512	2	-0.938704	2	NA	NA	-0.928321	2
ESRRG	ZIC3	Inhibition	-0.908251	1	-0.946297	1	NA	NA	-0.870204	1
ESRRG	ZMAT3	Activation	0.806644	2	0.877652	3	0.735636	1	NA	NA
ESRRG	ZMAT4	Activation	0.676659	3	0.662192	3	NA	NA	0.691126	3
ESRRG	ZNF124	Inhibition	-0.749849	3	-0.778879	3	-0.812225	3	-0.658444	3
ESRRG	ZNF25	Activation	0.7882	2.66667	0.803562	3	0.885929	2	0.675108	3
ESRRG	ZNF385B	Activation	0.879342	3	0.850584	3	0.908101	3	NA	NA
ESRRG	ZNF428	Activation	0.875925	2	0.875925	2	NA	NA	NA	NA
ESRRG	ZNF611	Inhibition	-0.767783	3	-0.810185	3	-0.777089	3	-0.716074	3
ESRRG	ZNF732	Inhibition	-0.934854	1	-0.934854	1	NA	NA	NA	NA
ESRRG	ZNF788P	Inhibition	-0.911584	1	-0.89963	1	NA	NA	-0.923539	1
ETS1	GLI3	Inhibition	-0.718382	1.5	-0.721682	2	-0.715081	1	NA	NA
ETS1	HAND1	Inhibition	-0.702734	2	-0.652054	1	NA	NA	-0.753414	3
ETS1	MSX2	Inhibition	-0.702093	2.5	-0.649757	2	NA	NA	-0.754429	3
ETS1	PRRX1	Inhibition	-0.71745	2.5	-0.714956	3	NA	NA	-0.719945	2
ETS2	ASH1L	Activation	0.678875	2	0.678875	2	NA	NA	NA	NA
ETS2	BHLHE40	Activation	0.761715	2.5	0.731016	3	NA	NA	0.792414	2
ETS2	BHLHE41	Activation	0.724129	3	0.724129	3	NA	NA	NA	NA
ETS2	CEBPD	Activation	0.753342	2.5	0.692271	2	NA	NA	0.814413	3
ETS2	FOXA3	Inhibition	-0.705939	1	-0.705939	1	NA	NA	NA	NA
ETS2	GATA3	Inhibition	-0.666731	2	-0.636635	3	-0.67406	1	-0.689498	2
ETS2	HAND1	Inhibition	-0.711503	2.33333	-0.670761	3	-0.768929	1	-0.69482	3
ETS2	HIF3A	Activation	0.781959	3	0.759021	3	NA	NA	0.804896	3
ETS2	HMGA1	Inhibition	-0.722654	2	-0.722654	2	NA	NA	NA	NA
ETS2	HOPX	Activation	0.692295	2.66667	0.710854	3	0.657446	3	0.708585	2
ETS2	ID1	Inhibition	-0.790952	2.5	-0.733256	3	NA	NA	-0.848647	2
ETS2	ID3	Inhibition	-0.694981	2.5	-0.654896	3	NA	NA	-0.735067	2
ETS2	IRF9	Activation	0.742547	2.5	0.644979	2	NA	NA	0.840116	3
ETS2	IRX4	Activation	0.771425	2.5	0.786221	3	NA	NA	0.756629	2
ETS2	JAZF1	Activation	0.738341	1	0.738341	1	NA	NA	NA	NA
ETS2	MSX2	Inhibition	-0.704278	3	-0.665104	3	NA	NA	-0.743452	3
ETS2	NFATC2	Activation	0.634107	2	0.634107	2	NA	NA	NA	NA
ETS2	NFIC	Activation	0.715327	2	0.71162	3	NA	NA	0.719033	1
ETS2	NR3C1	Activation	0.849061	1.5	0.837872	2	NA	NA	0.86025	1
ETS2	OVOL2	Inhibition	-0.718362	1.5	-0.71938	2	NA	NA	-0.717345	1
ETS2	SALL2	Inhibition	-0.721724	3	-0.640827	3	NA	NA	-0.80262	3
ETS2	STAT3	Activation	0.801071	2	0.764967	1	NA	NA	0.837174	3
ETS2	STAT4	Activation	0.752885	3	0.704406	3	NA	NA	0.801364	3
ETS2	TCF25	Activation	0.716481	2	0.716481	2	NA	NA	NA	NA
ETS2	TFAP2C	Inhibition	-0.776964	2	-0.776964	2	NA	NA	NA	NA
ETS2	TOX3	Inhibition	-0.645149	2	-0.639754	3	NA	NA	-0.650543	1
ETS2	TP53	Inhibition	-0.677096	3	-0.677096	3	NA	NA	NA	NA
ETS2	ZNF124	Inhibition	-0.808645	2.5	-0.793344	3	NA	NA	-0.823946	2
ETS2	ZNF215	Inhibition	-0.739349	1	-0.73473	1	NA	NA	-0.743968	1
ETS2	ZNF25	Activation	0.820282	2	0.831636	2	NA	NA	0.808928	2
ETS2	ZNF385B	Activation	0.712589	2	0.712589	2	NA	NA	NA	NA
ETS2	ZNF436	Activation	0.769533	2	0.680585	3	NA	NA	0.85848	1
ETS2	ZNF611	Inhibition	-0.646444	1	-0.646444	1	NA	NA	NA	NA
ETS2	ZNF730	Inhibition	-0.709852	1	-0.657256	1	NA	NA	-0.762447	1
ETV1	BCL11A	Activation	0.792827	1.66667	0.84994	1	0.695708	2	0.832831	2
ETV1	GATA3	Inhibition	-0.692965	2	-0.718067	1	NA	NA	-0.667863	3
ETV1	JAZF1	Activation	0.8017	1	0.8017	1	NA	NA	NA	NA
ETV1	NR3C1	Activation	0.71167	2	0.694748	2	0.665418	3	0.774843	1
ETV1	TOX3	Inhibition	-0.660164	3	-0.660164	3	NA	NA	NA	NA
ETV1	ZNF25	Activation	0.679802	2	0.679802	2	NA	NA	NA	NA
ETV4	AHR	Inhibition	-0.741223	2	-0.750717	1	-0.731729	3	NA	NA
ETV4	ARID5B	Inhibition	-0.81821	3	-0.879258	3	NA	NA	-0.757162	3
ETV4	ASH1L	Inhibition	-0.725124	2.5	-0.768613	2	-0.681635	3	NA	NA
ETV4	BCL11A	Inhibition	-0.654897	3	-0.63039	3	NA	NA	-0.679403	3
ETV4	BHLHE40	Inhibition	-0.719642	3	-0.719642	3	NA	NA	NA	NA
ETV4	BHLHE41	Inhibition	-0.664366	3	-0.664366	3	NA	NA	NA	NA
ETV4	BNC1	Inhibition	-0.86852	2	-0.86852	2	NA	NA	NA	NA
ETV4	CAMTA2	Inhibition	-0.74928	1.33333	-0.799861	1	-0.714961	2	-0.733019	1
ETV4	CARHSP1	Activation	0.892395	2	0.892685	2	0.932124	2	0.852376	2
ETV4	CASZ1	Inhibition	-0.84098	2.66667	-0.791965	2	-0.899336	3	-0.831638	3
ETV4	CDX2	Activation	0.719399	3	0.704135	3	NA	NA	0.734663	3
ETV4	CEBPD	Inhibition	-0.713175	2.5	-0.784413	3	NA	NA	-0.641937	2
ETV4	CREB5	Inhibition	-0.77494	3	-0.895124	3	NA	NA	-0.654756	3
ETV4	E2F7	Activation	0.803226	3	0.812561	3	0.820375	3	0.776743	3
ETV4	EGR1	Inhibition	-0.718392	2	-0.718392	2	NA	NA	NA	NA
ETV4	EOMES	Activation	0.857384	2	0.856263	2	0.87632	3	0.839567	1
ETV4	ETS2	Inhibition	-0.687458	3	-0.696734	3	NA	NA	-0.678183	3
ETV4	ETV1	Inhibition	-0.794424	3	-0.748285	3	NA	NA	-0.840562	3
ETV4	EVX1	Activation	0.75279	2.33333	0.779685	2	0.792727	3	0.685957	2
ETV4	FOSL2	Inhibition	-0.718185	1.5	-0.785226	1	NA	NA	-0.651144	2
ETV4	FOXA3	Activation	0.767819	2.66667	0.811133	3	0.706254	3	0.78607	2
ETV4	FOXH1	Activation	0.708381	2.33333	0.738371	1	0.657269	3	0.729503	3
ETV4	FOXM1	Activation	0.780854	2.66667	0.775911	3	0.821283	3	0.745368	2
ETV4	FOXP1	Inhibition	-0.888136	2	-0.915941	2	-0.843122	3	-0.905345	1
ETV4	HIF3A	Inhibition	-0.703155	3	-0.703155	3	NA	NA	NA	NA
ETV4	HMBOX1	Inhibition	-0.889516	2.66667	-0.923827	2	-0.877138	3	-0.867582	3
ETV4	HMGA1	Activation	0.783662	3	0.821148	3	0.776764	3	0.753073	3
ETV4	HOXA1	Activation	0.766735	3	0.707314	3	NA	NA	0.826157	3
ETV4	HOXB4	Inhibition	-0.83233	2	-0.830122	1	-0.834539	3	NA	NA
ETV4	ID3	Activation	0.684559	3	0.728934	3	0.641308	3	0.683436	3
ETV4	IRF2	Inhibition	-0.687842	3	-0.687842	3	NA	NA	NA	NA
ETV4	IRF9	Inhibition	-0.784639	3	-0.784639	3	NA	NA	NA	NA
ETV4	IRX4	Inhibition	-0.719934	2.66667	-0.692564	2	-0.694756	3	-0.772481	3
ETV4	JAZF1	Inhibition	-0.733119	3	-0.719548	3	-0.70945	3	-0.77036	3
ETV4	JUN	Inhibition	-0.815719	2	-0.854066	2	NA	NA	-0.777373	2
ETV4	KDM4C	Inhibition	-0.743812	3	-0.850528	3	-0.689112	3	-0.691797	3
ETV4	LHX1	Activation	0.88652	3	0.880191	3	0.909955	3	0.869413	3
ETV4	MAF	Inhibition	-0.77581	2.33333	-0.783843	2	-0.731679	3	-0.811907	2
ETV4	MEF2A	Inhibition	-0.886587	2	-0.84029	2	-0.932532	3	-0.88694	1
ETV4	MESP2	Activation	0.760684	2.33333	0.728479	2	0.855697	3	0.697876	2
ETV4	MIS18BP1	Activation	0.885172	2.33333	0.86239	2	0.930855	3	0.86227	2
ETV4	MITF	Inhibition	-0.904072	2.33333	-0.911449	1	-0.908356	3	-0.892412	3
ETV4	MXD1	Inhibition	-0.765376	1.5	-0.802548	2	NA	NA	-0.728205	1
ETV4	MYBL2	Activation	0.816506	3	0.856181	3	0.837516	3	0.755822	3
ETV4	MYCL	Activation	0.719696	3	0.719696	3	NA	NA	NA	NA
ETV4	MYCN	Activation	0.775337	3	0.730807	3	0.796912	3	0.798293	3
ETV4	MYRF	Inhibition	-0.857067	1	-0.881369	1	NA	NA	-0.832765	1
ETV4	NFATC2	Inhibition	-0.850639	3	-0.757227	3	-0.876156	3	-0.918534	3
ETV4	NFIA	Inhibition	-0.758111	3	-0.827109	3	-0.700044	3	-0.747178	3
ETV4	NFIB	Inhibition	-0.794918	3	-0.87843	3	NA	NA	-0.711406	3
ETV4	NFIC	Inhibition	-0.719961	2	-0.719961	2	NA	NA	NA	NA
ETV4	NKX2-5	Inhibition	-0.913232	2	-0.860529	2	-0.945516	3	-0.933652	1
ETV4	NR3C1	Inhibition	-0.696582	3	-0.676833	3	NA	NA	-0.716332	3
ETV4	NR6A1	Activation	0.776972	3	0.828367	3	0.749741	3	0.752808	3
ETV4	OTX2	Activation	0.837335	3	0.887212	3	0.787459	3	NA	NA
ETV4	OVOL2	Activation	0.72008	2.5	0.691	2	NA	NA	0.749161	3
ETV4	PBX1	Inhibition	-0.822593	1.33333	-0.780106	1	-0.832289	2	-0.855385	1
ETV4	PITX2	Inhibition	-0.773067	3	-0.770192	3	NA	NA	-0.775943	3
ETV4	PPARG	Inhibition	-0.674559	1	-0.674559	1	NA	NA	NA	NA
ETV4	PRDM1	Activation	0.76293	3	0.727012	3	NA	NA	0.798848	3
ETV4	PRDM16	Inhibition	-0.681159	3	-0.694869	3	NA	NA	-0.66745	3
ETV4	REPIN1	Inhibition	-0.716246	2	-0.63733	2	-0.795161	2	NA	NA
ETV4	SALL1	Activation	0.839512	3	0.899605	3	0.74035	3	0.878579	3
ETV4	SALL3	Activation	0.801651	1.5	0.849653	2	0.753649	1	NA	NA
ETV4	SALL4	Activation	0.79225	2.66667	0.85272	3	0.753278	3	0.770751	2
ETV4	SCAPER	Inhibition	-0.815535	2.5	-0.880147	2	-0.750923	3	NA	NA
ETV4	SOX6	Inhibition	-0.788755	1.5	-0.886551	1	-0.69096	2	NA	NA
ETV4	SP5	Activation	0.847726	2	0.824009	2	0.839795	3	0.879374	1
ETV4	SRY	Activation	0.775179	1.5	0.752607	2	0.797751	1	NA	NA
ETV4	STAT3	Inhibition	-0.684912	3	-0.684912	3	NA	NA	NA	NA
ETV4	STAT4	Inhibition	-0.645145	3	-0.645145	3	NA	NA	NA	NA
ETV4	TBX18	Inhibition	-0.874195	3	-0.904846	3	NA	NA	-0.843545	3
ETV4	TBX2	Inhibition	-0.847834	2	-0.79999	2	-0.895678	2	NA	NA
ETV4	TBX5	Inhibition	-0.854018	1.33333	-0.922184	2	-0.765131	1	-0.87474	1
ETV4	TBXT	Activation	0.755389	1.66667	0.760835	2	0.775811	2	0.729521	1
ETV4	TCF25	Inhibition	-0.773498	2	-0.773498	2	NA	NA	NA	NA
ETV4	TGIF1	Activation	0.850376	2	0.858254	2	0.85508	3	0.837795	1
ETV4	TRPS1	Inhibition	-0.777893	2.5	-0.816024	2	NA	NA	-0.739762	3
ETV4	TSHZ1	Inhibition	-0.762761	2	-0.790587	1	-0.734935	3	NA	NA
ETV4	TSHZ2	Inhibition	-0.845904	1.33333	-0.872105	1	-0.887101	2	-0.778507	1
ETV4	TSHZ3	Inhibition	-0.738104	2	-0.777698	1	NA	NA	-0.698511	3
ETV4	VENTX	Activation	0.805774	3	0.637814	3	0.888862	3	0.890646	3
ETV4	WDHD1	Activation	0.899692	2.66667	0.88	2	0.927736	3	0.89134	3
ETV4	WT1	Inhibition	-0.843292	3	-0.85783	3	NA	NA	-0.828754	3
ETV4	ZBTB20	Inhibition	-0.873768	2	-0.874981	2	-0.881376	3	-0.864947	1
ETV4	ZEB1	Inhibition	-0.865105	2	-0.876372	3	-0.853838	1	NA	NA
ETV4	ZFHX3	Inhibition	-0.882214	2.33333	-0.895232	2	-0.888448	3	-0.862963	2
ETV4	ZFP36L1	Inhibition	-0.827608	2.33333	-0.907362	3	-0.760621	3	-0.814841	1
ETV4	ZFP42	Activation	0.878601	1.66667	0.898508	2	0.920233	2	0.817062	1
ETV4	ZIC3	Activation	0.860142	2.66667	0.873797	3	0.847793	3	0.858837	2
ETV4	ZMAT3	Inhibition	-0.818583	2	-0.857401	3	-0.752968	2	-0.845381	1
ETV4	ZNF273	Activation	0.861041	2.33333	0.886515	3	0.858699	3	0.837908	1
ETV4	ZNF385B	Inhibition	-0.743893	3	-0.735005	3	NA	NA	-0.752781	3
ETV4	ZNF428	Inhibition	-0.887686	1.5	-0.906298	2	-0.869075	1	NA	NA
ETV4	ZNF467	Inhibition	-0.852296	1.5	-0.867863	2	-0.836728	1	NA	NA
ETV4	ZNF611	Activation	0.691577	3	0.691964	3	NA	NA	0.691189	3
ETV4	ZNF670	Activation	0.883808	2.33333	0.883505	2	0.88148	3	0.886437	2
ETV4	ZNF695	Activation	0.876119	2	0.878102	1	0.908044	3	0.842212	2
ETV4	ZNF730	Activation	0.837414	2.33333	0.798007	2	0.845012	2	0.869224	3
ETV4	ZNF788P	Activation	0.882988	2.33333	0.88723	2	0.889438	3	0.872296	2
ETV4	ZNF90	Activation	0.883869	2	0.879601	1	0.917937	3	0.854069	2
ETV4	ZNF93	Activation	0.904975	3	0.915415	3	0.893426	3	0.906085	3
EVX1	BCL11A	Inhibition	-0.79469	3	-0.79469	3	NA	NA	NA	NA
EVX1	CDX2	Activation	0.707613	1	0.707613	1	NA	NA	NA	NA
EVX1	CREB5	Inhibition	-0.645977	1	-0.645977	1	NA	NA	NA	NA
EVX1	ETV1	Inhibition	-0.728889	3	-0.728889	3	NA	NA	NA	NA
EVX1	FOXC1	Activation	0.727606	1	0.686612	1	0.768601	1	NA	NA
EVX1	GATA3	Activation	0.676091	3	0.676091	3	NA	NA	NA	NA
EVX1	HOXA1	Activation	0.670321	1	0.670321	1	NA	NA	NA	NA
EVX1	ID3	Activation	0.67908	1	0.67908	1	NA	NA	NA	NA
EVX1	IRF9	Inhibition	-0.73478	3	-0.73478	3	NA	NA	NA	NA
EVX1	JAZF1	Inhibition	-0.677616	2	-0.637945	2	-0.717286	2	NA	NA
EVX1	MEIS1	Activation	0.656527	3	0.656527	3	NA	NA	NA	NA
EVX1	MYCL	Activation	0.683972	3	0.683972	3	NA	NA	NA	NA
EVX1	NR3C1	Inhibition	-0.680003	3	-0.680003	3	NA	NA	NA	NA
EVX1	PITX2	Inhibition	-0.661606	1	-0.661606	1	NA	NA	NA	NA
EVX1	PRDM1	Activation	0.670328	3	0.653585	3	0.687071	3	NA	NA
EVX1	RXRG	Inhibition	-0.681366	3	-0.681366	3	NA	NA	NA	NA
EVX1	SALL1	Activation	0.743393	1	0.846321	1	0.640465	1	NA	NA
EVX1	SP6	Activation	0.671948	2	0.671948	2	NA	NA	NA	NA
EVX1	VENTX	Activation	0.696885	1	0.696885	1	NA	NA	NA	NA
EVX1	ZMAT4	Inhibition	-0.677318	3	-0.677318	3	NA	NA	NA	NA
EVX1	ZNF611	Activation	0.656938	2	0.656938	2	NA	NA	NA	NA
FOSL1	AHR	Inhibition	-0.709848	2	-0.709848	2	NA	NA	NA	NA
FOSL1	ARID5B	Inhibition	-0.722096	2	-0.746363	3	-0.641162	2	-0.778762	1
FOSL1	ASH1L	Inhibition	-0.711351	2	-0.678583	2	-0.708094	2	-0.747378	2
FOSL1	BNC1	Inhibition	-0.718188	1.66667	-0.753497	2	-0.688226	2	-0.712842	1
FOSL1	CAMTA2	Inhibition	-0.755415	2.5	-0.789457	3	-0.721373	2	NA	NA
FOSL1	CARHSP1	Activation	0.763064	3	0.805717	3	0.761946	3	0.72153	3
FOSL1	CASZ1	Inhibition	-0.718274	3	-0.679557	3	-0.75699	3	NA	NA
FOSL1	CDX2	Activation	0.777327	3	0.777327	3	NA	NA	NA	NA
FOSL1	CEBPD	Inhibition	-0.665914	2.33333	-0.646199	2	-0.659547	3	-0.691997	2
FOSL1	CREB5	Inhibition	-0.822281	3	-0.822281	3	NA	NA	NA	NA
FOSL1	E2F7	Activation	0.681819	2.5	0.650002	2	0.713636	3	NA	NA
FOSL1	EGR1	Inhibition	-0.661857	2	-0.661857	2	NA	NA	NA	NA
FOSL1	EOMES	Activation	0.783547	2.33333	0.867166	2	0.820289	3	0.663187	2
FOSL1	EPAS1	Inhibition	-0.654089	2	-0.654089	2	NA	NA	NA	NA
FOSL1	ESRRG	Inhibition	-0.760347	2.66667	-0.817443	2	-0.744795	3	-0.718802	3
FOSL1	ETV4	Activation	0.77936	1.33333	0.857009	1	0.828764	1	0.652308	2
FOSL1	EVX1	Activation	0.727384	3	0.855942	3	0.653033	3	0.673178	3
FOSL1	FOSL2	Inhibition	-0.700774	1	-0.700774	1	NA	NA	NA	NA
FOSL1	FOXA3	Activation	0.658618	2	0.6562	3	0.659395	1	0.660259	2
FOSL1	FOXC1	Activation	0.714296	3	0.686645	3	0.741947	3	NA	NA
FOSL1	FOXH1	Activation	0.697202	2.5	0.674727	2	0.719676	3	NA	NA
FOSL1	FOXM1	Activation	0.685796	3	0.676965	3	0.685409	3	0.695016	3
FOSL1	FOXP1	Inhibition	-0.790041	2.66667	-0.850109	2	-0.822675	3	-0.697338	3
FOSL1	GATA4	Inhibition	-0.829017	2.33333	-0.898485	1	-0.842268	3	-0.7463	3
FOSL1	GATA5	Inhibition	-0.818397	1	-0.818397	1	NA	NA	NA	NA
FOSL1	GSC	Activation	0.767184	2	0.755045	2	0.779322	2	NA	NA
FOSL1	HAND2	Inhibition	-0.824467	2.66667	-0.866879	3	-0.87867	3	-0.727852	2
FOSL1	HMBOX1	Inhibition	-0.765687	2.66667	-0.844125	2	-0.755928	3	-0.697009	3
FOSL1	HMGA1	Activation	0.713669	2.66667	0.665951	2	0.752418	3	0.722638	3
FOSL1	HOXA1	Activation	0.676545	3	0.65355	3	NA	NA	0.69954	3
FOSL1	HOXB4	Inhibition	-0.790162	2	-0.705246	2	-0.859173	3	-0.806069	1
FOSL1	JUN	Inhibition	-0.763737	2.5	-0.813007	3	NA	NA	-0.714467	2
FOSL1	KDM4C	Inhibition	-0.714292	3	-0.784559	3	-0.712815	3	-0.645504	3
FOSL1	LHX1	Activation	0.813013	3	0.865736	3	0.877229	3	0.696073	3
FOSL1	MAF	Inhibition	-0.659977	2	-0.675919	2	NA	NA	-0.644035	2
FOSL1	MECOM	Inhibition	-0.697332	1.33333	-0.760073	1	-0.654386	2	-0.677537	1
FOSL1	MEF2A	Inhibition	-0.742092	3	-0.733256	3	-0.781026	3	-0.711995	3
FOSL1	MEF2C	Inhibition	-0.752393	2.5	-0.834443	3	-0.670344	2	NA	NA
FOSL1	MEIS2	Inhibition	-0.803162	1.33333	-0.823061	1	-0.826072	1	-0.760353	2
FOSL1	MESP1	Activation	0.780933	3	0.795278	3	0.766587	3	NA	NA
FOSL1	MESP2	Activation	0.820473	3	0.830025	3	0.81092	3	NA	NA
FOSL1	MIS18BP1	Activation	0.730146	3	0.774345	3	0.685947	3	NA	NA
FOSL1	MITF	Inhibition	-0.797732	2.5	-0.8362	2	-0.759264	3	NA	NA
FOSL1	MIXL1	Activation	0.680249	2	0.680249	2	NA	NA	NA	NA
FOSL1	MXD1	Inhibition	-0.740982	1	-0.734268	1	-0.747697	1	NA	NA
FOSL1	MYBL2	Activation	0.74443	2.66667	0.761772	2	0.744343	3	0.727176	3
FOSL1	MYCN	Activation	0.691606	3	0.675344	3	0.758705	3	0.64077	3
FOSL1	MYRF	Inhibition	-0.773561	1.33333	-0.802484	2	-0.763727	1	-0.754473	1
FOSL1	NFE2L3	Activation	0.825409	1	0.825409	1	NA	NA	NA	NA
FOSL1	NFIA	Inhibition	-0.67882	3	-0.663081	3	-0.706503	3	-0.666877	3
FOSL1	NFIB	Inhibition	-0.674357	3	-0.686329	3	NA	NA	-0.662385	3
FOSL1	NKX2-5	Inhibition	-0.746211	3	-0.763214	3	-0.778137	3	-0.697282	3
FOSL1	NR6A1	Activation	0.707384	2.66667	0.71885	3	0.686192	3	0.717111	2
FOSL1	OTX2	Activation	0.783307	1.66667	0.774873	2	0.790359	2	0.784691	1
FOSL1	PBX1	Inhibition	-0.670665	2	-0.690167	2	-0.651163	2	NA	NA
FOSL1	PITX2	Inhibition	-0.710238	3	-0.710238	3	NA	NA	NA	NA
FOSL1	PLAGL1	Inhibition	-0.79339	1	-0.79339	1	NA	NA	NA	NA
FOSL1	POU2F3	Activation	0.718811	1	0.746258	1	0.716569	1	0.693604	1
FOSL1	POU5F1	Activation	0.780684	1.66667	0.85304	2	0.813026	2	0.675987	1
FOSL1	PROX1	Inhibition	-0.75472	1	-0.718482	1	-0.842573	1	-0.703106	1
FOSL1	REPIN1	Inhibition	-0.676936	3	-0.676936	3	NA	NA	NA	NA
FOSL1	SALL1	Activation	0.715297	3	0.757583	3	0.711404	3	0.676906	3
FOSL1	SALL3	Activation	0.75465	2	0.79202	2	0.728956	2	0.742972	2
FOSL1	SALL4	Activation	0.732158	3	0.704758	3	0.77361	3	0.718106	3
FOSL1	SCAPER	Inhibition	-0.791369	2.33333	-0.808641	2	-0.778958	3	-0.78651	2
FOSL1	SMAD9	Inhibition	-0.835879	1	-0.856389	1	-0.81537	1	NA	NA
FOSL1	SOX5	Inhibition	-0.658378	1	-0.658378	1	NA	NA	NA	NA
FOSL1	SOX6	Inhibition	-0.707939	2.33333	-0.771983	3	-0.649567	3	-0.702267	1
FOSL1	SP5	Activation	0.787068	3	0.831206	3	0.84208	3	0.687918	3
FOSL1	SRY	Activation	0.704191	2	0.649415	2	0.758967	2	NA	NA
FOSL1	TBX18	Inhibition	-0.710549	2	-0.756799	3	-0.656013	2	-0.718833	1
FOSL1	TBX2	Inhibition	-0.75314	3	-0.787849	3	-0.718431	3	NA	NA
FOSL1	TBX5	Inhibition	-0.805567	2.33333	-0.840756	3	-0.803755	2	-0.772188	2
FOSL1	TBXT	Activation	0.778594	2	0.804379	2	0.75281	2	NA	NA
FOSL1	TCF19	Activation	0.697629	1	0.722485	1	0.672774	1	NA	NA
FOSL1	TCF21	Inhibition	-0.774118	1.5	-0.785049	1	NA	NA	-0.763187	2
FOSL1	TGIF1	Activation	0.784151	2.33333	0.774359	2	0.833811	3	0.744283	2
FOSL1	TRPS1	Inhibition	-0.789395	2	-0.789395	2	NA	NA	NA	NA
FOSL1	TSC22D3	Inhibition	-0.718543	2.33333	-0.684952	3	-0.830184	1	-0.640495	3
FOSL1	TSHZ1	Inhibition	-0.7122	2	-0.710361	1	-0.714038	3	NA	NA
FOSL1	TSHZ2	Inhibition	-0.807951	2	-0.817858	2	-0.798043	2	NA	NA
FOSL1	TSHZ3	Inhibition	-0.712729	3	-0.712729	3	NA	NA	NA	NA
FOSL1	TWIST1	Inhibition	-0.761829	1	-0.761829	1	NA	NA	NA	NA
FOSL1	VENTX	Activation	0.714015	3	0.742337	3	0.736538	3	0.66317	3
FOSL1	WDHD1	Activation	0.776492	3	0.757504	3	0.795479	3	NA	NA
FOSL1	WT1	Inhibition	-0.694951	2	-0.675447	3	NA	NA	-0.714455	1
FOSL1	ZBTB20	Inhibition	-0.723493	3	-0.781356	3	-0.723922	3	-0.6652	3
FOSL1	ZEB1	Inhibition	-0.779394	1.5	-0.789041	1	NA	NA	-0.769746	2
FOSL1	ZFHX3	Inhibition	-0.751386	2.5	-0.791525	2	-0.711247	3	NA	NA
FOSL1	ZFP36L1	Inhibition	-0.729276	3	-0.747217	3	-0.762103	3	-0.678507	3
FOSL1	ZFP42	Activation	0.784303	2.66667	0.76318	3	0.831521	3	0.75821	2
FOSL1	ZFPM2	Inhibition	-0.807779	3	-0.83589	3	-0.779667	3	NA	NA
FOSL1	ZIC2	Activation	0.792483	1.66667	0.847258	1	0.848692	2	0.681499	2
FOSL1	ZIC3	Activation	0.774322	3	0.847894	3	0.822852	3	0.65222	3
FOSL1	ZIC5	Activation	0.810594	1	0.838965	1	0.782223	1	NA	NA
FOSL1	ZMAT3	Inhibition	-0.75976	2.5	-0.745211	2	-0.77431	3	NA	NA
FOSL1	ZNF101	Activation	0.774677	1	0.774677	1	NA	NA	NA	NA
FOSL1	ZNF121	Activation	0.785988	1	0.849955	1	0.795952	1	0.712057	1
FOSL1	ZNF165	Activation	0.670196	1	0.670196	1	NA	NA	NA	NA
FOSL1	ZNF273	Activation	0.731232	1.66667	0.725149	2	0.767777	2	0.70077	1
FOSL1	ZNF385B	Inhibition	-0.643465	1.5	-0.632902	2	-0.654029	1	NA	NA
FOSL1	ZNF428	Inhibition	-0.787618	2	-0.84048	3	-0.794676	2	-0.727698	1
FOSL1	ZNF467	Inhibition	-0.748206	1.66667	-0.753528	3	-0.778071	1	-0.713019	1
FOSL1	ZNF649	Activation	0.783845	1.33333	0.874553	2	0.73867	1	0.738312	1
FOSL1	ZNF670	Activation	0.737671	2.66667	0.773326	3	0.741273	3	0.698415	2
FOSL1	ZNF695	Activation	0.753512	2	0.819329	2	0.742351	2	0.698855	2
FOSL1	ZNF721	Activation	0.855899	1	0.855899	1	NA	NA	NA	NA
FOSL1	ZNF730	Activation	0.683596	2.66667	0.677192	3	0.732715	2	0.640881	3
FOSL1	ZNF732	Activation	0.749991	3	0.782375	3	0.717606	3	NA	NA
FOSL1	ZNF788P	Activation	0.740324	2.33333	0.801128	2	0.721326	3	0.698518	2
FOSL1	ZNF860	Activation	0.788172	1	0.774859	1	0.801486	1	NA	NA
FOSL1	ZNF93	Activation	0.762265	2	0.821806	2	NA	NA	0.702724	2
FOSL1	ZSCAN10	Activation	0.868428	3	0.868428	3	NA	NA	NA	NA
FOSL2	ARID5B	Activation	0.759706	3	0.759706	3	NA	NA	NA	NA
FOSL2	BNC1	Activation	0.813303	1	0.813303	1	NA	NA	NA	NA
FOSL2	CASZ1	Activation	0.678417	3	0.647345	3	NA	NA	0.709489	3
FOSL2	CREB5	Activation	0.793445	3	0.793445	3	NA	NA	NA	NA
FOSL2	E2F7	Inhibition	-0.667219	2	-0.667219	2	NA	NA	NA	NA
FOSL2	EOMES	Inhibition	-0.700716	1	-0.700716	1	NA	NA	NA	NA
FOSL2	ESRRG	Activation	0.690935	1	0.703546	1	NA	NA	0.678324	1
FOSL2	ETS2	Activation	0.65774	3	0.65774	3	NA	NA	NA	NA
FOSL2	ETV1	Activation	0.788435	3	0.788435	3	NA	NA	NA	NA
FOSL2	FOXA3	Inhibition	-0.67083	1	-0.653581	1	NA	NA	-0.688079	1
FOSL2	FOXM1	Inhibition	-0.684915	2	-0.711525	2	NA	NA	-0.658304	2
FOSL2	GATA4	Activation	0.773292	1	0.773292	1	NA	NA	NA	NA
FOSL2	HMBOX1	Activation	0.753534	2	0.789988	3	NA	NA	0.717081	1
FOSL2	HMGA1	Inhibition	-0.683041	2	-0.645218	3	NA	NA	-0.720864	1
FOSL2	IRF9	Activation	0.718394	3	0.771904	3	NA	NA	0.664885	3
FOSL2	JUN	Activation	0.749476	3	0.749476	3	NA	NA	NA	NA
FOSL2	KDM4C	Activation	0.729882	3	0.729882	3	NA	NA	NA	NA
FOSL2	LHX1	Inhibition	-0.688007	2.5	-0.716895	2	NA	NA	-0.65912	3
FOSL2	MAF	Activation	0.658639	3	0.658639	3	NA	NA	NA	NA
FOSL2	MEF2A	Activation	0.676111	3	0.671677	3	NA	NA	0.680546	3
FOSL2	MIS18BP1	Inhibition	-0.714215	2	-0.714215	2	NA	NA	NA	NA
FOSL2	MITF	Activation	0.749442	1	0.793253	1	NA	NA	0.705631	1
FOSL2	MYBL2	Inhibition	-0.757601	3	-0.741212	3	NA	NA	-0.773989	3
FOSL2	MYRF	Activation	0.786438	1	0.786438	1	NA	NA	NA	NA
FOSL2	NFATC2	Activation	0.674479	2	0.668082	3	NA	NA	0.680876	1
FOSL2	NFIA	Activation	0.692145	2	0.670594	3	NA	NA	0.713696	1
FOSL2	NFIB	Activation	0.711467	2.66667	0.737852	3	0.700168	2	0.696383	3
FOSL2	NKX2-5	Activation	0.681746	3	0.681746	3	NA	NA	NA	NA
FOSL2	NR6A1	Inhibition	-0.699814	3	-0.667354	3	NA	NA	-0.732275	3
FOSL2	OTX2	Inhibition	-0.745382	2.5	-0.704797	3	NA	NA	-0.785968	2
FOSL2	PLAGL1	Activation	0.755556	3	0.755556	3	NA	NA	NA	NA
FOSL2	PRDM1	Inhibition	-0.68481	3	-0.68481	3	NA	NA	NA	NA
FOSL2	RXRG	Activation	0.664337	3	0.664337	3	NA	NA	NA	NA
FOSL2	SALL1	Inhibition	-0.730577	3	-0.730577	3	NA	NA	NA	NA
FOSL2	SALL2	Inhibition	-0.697366	3	-0.659374	3	NA	NA	-0.735357	3
FOSL2	SALL3	Inhibition	-0.666117	1	-0.666117	1	NA	NA	NA	NA
FOSL2	SALL4	Inhibition	-0.688967	3	-0.665924	3	NA	NA	-0.712011	3
FOSL2	SCAPER	Activation	0.705263	3	0.748193	3	NA	NA	0.662333	3
FOSL2	SMAD9	Activation	0.709597	1	0.709597	1	NA	NA	NA	NA
FOSL2	SP5	Inhibition	-0.698782	1	-0.698782	1	NA	NA	NA	NA
FOSL2	TBX18	Activation	0.777044	2	0.791936	3	NA	NA	0.762153	1
FOSL2	TBX5	Activation	0.759756	2	0.775081	1	NA	NA	0.744432	3
FOSL2	TCF19	Inhibition	-0.671076	1	-0.650777	1	NA	NA	-0.691374	1
FOSL2	TCF25	Activation	0.727456	3	0.723634	3	NA	NA	0.731277	3
FOSL2	TGIF1	Inhibition	-0.718641	2	-0.682685	1	NA	NA	-0.754597	3
FOSL2	TRPS1	Activation	0.744099	2	0.730283	3	NA	NA	0.757914	1
FOSL2	TSHZ3	Activation	0.717024	3	0.717024	3	NA	NA	NA	NA
FOSL2	WDHD1	Inhibition	-0.732924	1	-0.695902	1	NA	NA	-0.769947	1
FOSL2	WT1	Activation	0.761184	3	0.761184	3	NA	NA	NA	NA
FOSL2	ZBTB20	Activation	0.724312	3	0.791702	3	NA	NA	0.656923	3
FOSL2	ZEB1	Activation	0.734376	3	0.679486	3	NA	NA	0.789266	3
FOSL2	ZFHX3	Activation	0.815427	3	0.815427	3	NA	NA	NA	NA
FOSL2	ZFP36L1	Activation	0.716196	3	0.736377	3	NA	NA	0.696015	3
FOSL2	ZFP42	Inhibition	-0.746596	3	-0.750572	3	NA	NA	-0.742621	3
FOSL2	ZFPM2	Activation	0.743166	1	0.793516	1	NA	NA	0.692816	1
FOSL2	ZMAT3	Activation	0.648572	3	0.648572	3	NA	NA	NA	NA
FOSL2	ZNF215	Inhibition	-0.713813	1.5	-0.679358	2	NA	NA	-0.748267	1
FOSL2	ZNF273	Inhibition	-0.756719	1.5	-0.770419	2	NA	NA	-0.743019	1
FOSL2	ZNF428	Activation	0.737824	2.5	0.77028	3	NA	NA	0.705368	2
FOSL2	ZNF436	Activation	0.687459	2.5	0.659656	3	NA	NA	0.715262	2
FOSL2	ZNF467	Activation	0.690534	2.5	0.739688	3	NA	NA	0.641379	2
FOSL2	ZNF670	Inhibition	-0.724048	2.5	-0.762121	3	NA	NA	-0.685975	2
FOSL2	ZNF695	Inhibition	-0.742648	2	-0.742648	2	NA	NA	NA	NA
FOSL2	ZNF704	Activation	0.721879	2	0.724559	3	NA	NA	0.719199	1
FOSL2	ZNF724	Inhibition	-0.714206	1	-0.737836	1	NA	NA	-0.690576	1
FOSL2	ZNF730	Inhibition	-0.689088	1.5	-0.677489	2	NA	NA	-0.700687	1
FOSL2	ZNF788P	Inhibition	-0.784123	1	-0.784123	1	NA	NA	NA	NA
FOSL2	ZNF90	Inhibition	-0.70224	2	-0.70224	2	NA	NA	NA	NA
FOSL2	ZNF93	Inhibition	-0.767452	1.5	-0.774371	2	NA	NA	-0.760534	1
FOXA3	ARID5B	Inhibition	-0.868735	2	-0.871691	1	-0.818923	2	-0.915591	3
FOXA3	ASH1L	Inhibition	-0.846287	2	-0.879131	2	-0.862531	2	-0.7972	2
FOXA3	BHLHE40	Inhibition	-0.807881	2.66667	-0.834717	2	-0.771159	3	-0.817765	3
FOXA3	BHLHE41	Inhibition	-0.787453	3	-0.787453	3	NA	NA	NA	NA
FOXA3	CASZ1	Inhibition	-0.870394	1.66667	-0.886691	2	-0.830984	1	-0.893508	2
FOXA3	CDX2	Activation	0.641725	3	0.641725	3	NA	NA	NA	NA
FOXA3	CEBPD	Inhibition	-0.846702	2.66667	-0.868663	2	-0.765531	3	-0.90591	3
FOXA3	EGR1	Inhibition	-0.776659	2	-0.81185	2	NA	NA	-0.741469	2
FOXA3	ETS2	Inhibition	-0.77786	2.66667	-0.800435	2	-0.700923	3	-0.832223	3
FOXA3	FOXH1	Activation	0.811684	2	0.851603	1	0.728731	2	0.854717	3
FOXA3	FOXM1	Activation	0.860387	1	0.804954	1	NA	NA	0.91582	1
FOXA3	GATA3	Activation	0.816037	3	0.802041	3	NA	NA	0.830034	3
FOXA3	HIF3A	Inhibition	-0.847128	2	-0.853859	3	-0.843755	1	-0.84377	2
FOXA3	HOPX	Inhibition	-0.702676	2	-0.750178	2	NA	NA	-0.655174	2
FOXA3	HOXA1	Activation	0.748626	3	0.713852	3	0.723534	3	0.808492	3
FOXA3	ID1	Activation	0.739394	3	0.693076	3	NA	NA	0.785713	3
FOXA3	ID3	Activation	0.832814	3	0.822196	3	0.792158	3	0.884089	3
FOXA3	IRF2	Inhibition	-0.825754	2.33333	-0.881113	3	-0.735932	2	-0.860217	2
FOXA3	IRF9	Inhibition	-0.835035	2.66667	-0.827292	2	-0.797988	3	-0.879826	3
FOXA3	IRX4	Inhibition	-0.845196	2	-0.874658	2	-0.815734	2	NA	NA
FOXA3	JAZF1	Inhibition	-0.836488	2.66667	-0.822581	3	-0.811947	3	-0.874935	2
FOXA3	JUN	Inhibition	-0.788451	2.5	-0.854824	2	-0.722078	3	NA	NA
FOXA3	JUNB	Inhibition	-0.754675	2.66667	-0.681112	3	-0.790654	3	-0.792259	2
FOXA3	KDM4C	Inhibition	-0.804427	3	-0.79198	3	-0.840948	3	-0.780354	3
FOXA3	LEF1	Activation	0.749995	3	0.745112	3	0.691796	3	0.813077	3
FOXA3	LHX1	Activation	0.730681	2.33333	0.734679	2	0.720506	2	0.736859	3
FOXA3	MAF	Inhibition	-0.864744	2	-0.864744	2	NA	NA	NA	NA
FOXA3	MSX1	Activation	0.74085	3	0.714505	3	0.72279	3	0.785256	3
FOXA3	MXD1	Inhibition	-0.795196	1.66667	-0.819959	2	-0.797113	1	-0.768516	2
FOXA3	MYCL	Activation	0.841907	2.5	0.867322	2	0.816492	3	NA	NA
FOXA3	MYCN	Activation	0.702968	3	0.67268	3	0.733256	3	NA	NA
FOXA3	NFATC2	Inhibition	-0.797936	2	-0.774128	3	NA	NA	-0.821744	1
FOXA3	NFE2L3	Activation	0.646352	1	0.646352	1	NA	NA	NA	NA
FOXA3	NFIA	Inhibition	-0.91565	2.33333	-0.918001	3	-0.907842	1	-0.921108	3
FOXA3	NFIB	Inhibition	-0.87294	1.66667	-0.909138	1	-0.796058	1	-0.913624	3
FOXA3	NFIC	Inhibition	-0.862334	2.66667	-0.875159	3	-0.844791	2	-0.867053	3
FOXA3	NR3C1	Inhibition	-0.805889	2.33333	-0.839796	3	-0.678247	2	-0.899623	2
FOXA3	OTX2	Activation	0.842828	2	0.886267	1	0.799389	3	NA	NA
FOXA3	OVOL2	Activation	0.794093	2	0.794093	2	NA	NA	NA	NA
FOXA3	PBX1	Inhibition	-0.663114	1	-0.663114	1	NA	NA	NA	NA
FOXA3	PLAGL1	Inhibition	-0.822692	2	-0.798939	1	-0.846405	3	-0.822732	2
FOXA3	PRDM1	Activation	0.752617	2.5	0.689014	2	NA	NA	0.816219	3
FOXA3	PRDM16	Inhibition	-0.852143	2.5	-0.881471	2	-0.822815	3	NA	NA
FOXA3	PROX1	Inhibition	-0.771006	2.5	-0.731553	3	-0.810459	2	NA	NA
FOXA3	SALL1	Activation	0.819006	2.66667	0.734737	2	0.838834	3	0.883446	3
FOXA3	SALL2	Activation	0.846579	3	0.847794	3	0.850611	3	0.841331	3
FOXA3	SCAPER	Inhibition	-0.827723	2	-0.834191	2	-0.821255	2	NA	NA
FOXA3	SP5	Activation	0.658207	2	0.639763	2	0.649541	2	0.685318	2
FOXA3	SP6	Activation	0.720777	3	0.678731	3	NA	NA	0.762823	3
FOXA3	SRY	Activation	0.775926	1.5	0.763713	2	NA	NA	0.78814	1
FOXA3	STAT3	Inhibition	-0.870991	2.33333	-0.904223	3	-0.83526	2	-0.873492	2
FOXA3	STAT4	Inhibition	-0.784192	3	-0.850366	3	NA	NA	-0.718018	3
FOXA3	TCF25	Inhibition	-0.844062	2	-0.885459	2	-0.802666	2	NA	NA
FOXA3	TFAP2C	Activation	0.698653	3	0.698653	3	NA	NA	NA	NA
FOXA3	TRPS1	Inhibition	-0.80823	1.5	-0.801598	1	NA	NA	-0.814862	2
FOXA3	TSHZ1	Inhibition	-0.707769	1	-0.670426	1	-0.745113	1	NA	NA
FOXA3	TSHZ2	Inhibition	-0.838867	1	-0.838867	1	NA	NA	NA	NA
FOXA3	TSHZ3	Inhibition	-0.720457	1	-0.720457	1	NA	NA	NA	NA
FOXA3	WT1	Inhibition	-0.872289	1.5	-0.883483	1	NA	NA	-0.861094	2
FOXA3	ZBTB20	Inhibition	-0.85882	1.66667	-0.835049	2	-0.869544	1	-0.871869	2
FOXA3	ZEB1	Inhibition	-0.869725	2.33333	-0.895447	3	-0.844674	1	-0.869055	3
FOXA3	ZEB2	Inhibition	-0.634655	3	-0.634655	3	NA	NA	NA	NA
FOXA3	ZMAT3	Inhibition	-0.825274	2.33333	-0.858942	3	-0.790968	3	-0.825911	1
FOXA3	ZNF124	Activation	0.800206	3	0.827777	3	0.809635	3	0.763207	3
FOXA3	ZNF25	Inhibition	-0.774997	2.33333	-0.838524	3	-0.745029	2	-0.741437	2
FOXA3	ZNF385B	Inhibition	-0.81637	2	-0.860117	2	-0.841614	2	-0.747378	2
FOXA3	ZNF611	Activation	0.747474	3	0.814444	3	NA	NA	0.680504	3
FOXA3	ZNF695	Activation	0.862845	1	0.865088	1	NA	NA	0.860602	1
FOXA3	ZNF90	Activation	0.833512	1	0.844033	1	0.822991	1	NA	NA
FOXC1	DACH1	Activation	0.630591	3	0.630591	3	NA	NA	NA	NA
FOXC1	DDIT3	Activation	0.645703	2	0.645703	2	NA	NA	NA	NA
FOXC1	GATA2	Activation	0.660817	3	0.660817	3	NA	NA	NA	NA
FOXC1	GLI3	Activation	0.648317	2	0.648317	2	NA	NA	NA	NA
FOXC1	HOXB2	Activation	0.722252	1.5	0.709282	2	NA	NA	0.735222	1
FOXC1	HOXB3	Activation	0.644131	2	0.644131	2	NA	NA	NA	NA
FOXC1	ID4	Activation	0.676644	2	0.718572	1	0.641336	3	0.670023	2
FOXC1	IRX5	Activation	0.681679	1	0.681679	1	NA	NA	NA	NA
FOXC1	ISL1	Activation	0.780663	1.5	0.764362	1	0.796964	2	NA	NA
FOXC1	MEIS1	Activation	0.735675	1.66667	0.753086	1	0.675492	3	0.778447	1
FOXC1	MSX1	Activation	0.70052	1	0.70052	1	NA	NA	NA	NA
FOXC1	PRRX1	Activation	0.659388	3	0.659388	3	NA	NA	NA	NA
FOXC1	RARB	Activation	0.720195	1.5	0.644596	2	NA	NA	0.795795	1
FOXC1	SPIB	Inhibition	-0.656697	2	-0.656697	2	NA	NA	NA	NA
FOXC1	ZNF165	Inhibition	-0.67086	1	-0.67086	1	NA	NA	NA	NA
FOXF1	ARID5B	Activation	0.790998	3	0.790998	3	NA	NA	NA	NA
FOXF1	ASH1L	Activation	0.667683	2	0.667683	2	NA	NA	NA	NA
FOXF1	BNC1	Activation	0.8299	1	0.8299	1	NA	NA	NA	NA
FOXF1	CAMTA2	Activation	0.835834	1	0.835834	1	NA	NA	NA	NA
FOXF1	CARHSP1	Inhibition	-0.828532	1	-0.828532	1	NA	NA	NA	NA
FOXF1	CASZ1	Activation	0.666881	3	0.666881	3	NA	NA	NA	NA
FOXF1	CDX2	Inhibition	-0.774033	3	-0.774033	3	NA	NA	NA	NA
FOXF1	CEBPD	Activation	0.635293	3	0.635293	3	NA	NA	NA	NA
FOXF1	CREB5	Activation	0.736641	2	0.736641	2	NA	NA	NA	NA
FOXF1	DACH1	Activation	0.706144	2	0.760421	1	NA	NA	0.651868	3
FOXF1	DDIT3	Activation	0.750891	1	0.750891	1	NA	NA	NA	NA
FOXF1	E2F7	Inhibition	-0.670762	2	-0.670762	2	NA	NA	NA	NA
FOXF1	EOMES	Inhibition	-0.814188	2	-0.880816	2	NA	NA	-0.747561	2
FOXF1	EPAS1	Activation	0.665771	1.5	0.647116	2	NA	NA	0.684427	1
FOXF1	ESRRG	Activation	0.83773	2	0.83773	2	NA	NA	NA	NA
FOXF1	ETS2	Activation	0.632588	3	0.632588	3	NA	NA	NA	NA
FOXF1	ETV4	Inhibition	-0.777497	2.5	-0.809576	3	NA	NA	-0.745419	2
FOXF1	EVX1	Inhibition	-0.788419	3	-0.788419	3	NA	NA	NA	NA
FOXF1	FOSL2	Activation	0.649499	3	0.649499	3	NA	NA	NA	NA
FOXF1	FOXA3	Inhibition	-0.751144	3	-0.751144	3	NA	NA	NA	NA
FOXF1	FOXC1	Inhibition	-0.700809	3	-0.700809	3	NA	NA	NA	NA
FOXF1	FOXH1	Inhibition	-0.660022	3	-0.660022	3	NA	NA	NA	NA
FOXF1	FOXM1	Inhibition	-0.694363	2	-0.694363	2	NA	NA	NA	NA
FOXF1	FOXP1	Activation	0.887375	1	0.887375	1	NA	NA	NA	NA
FOXF1	GATA4	Activation	0.753432	1.5	0.853178	1	NA	NA	0.653687	2
FOXF1	GATA5	Activation	0.787031	1.5	0.83821	1	NA	NA	0.735852	2
FOXF1	GSC	Inhibition	-0.687786	2	-0.687786	2	NA	NA	NA	NA
FOXF1	HAND2	Activation	0.771655	2	0.897786	2	NA	NA	0.645525	2
FOXF1	HEY1	Activation	0.765556	1.5	0.782788	1	NA	NA	0.748324	2
FOXF1	HIF3A	Activation	0.630183	1	0.630183	1	NA	NA	NA	NA
FOXF1	HMBOX1	Activation	0.851415	2	0.851415	2	NA	NA	NA	NA
FOXF1	HMGA1	Inhibition	-0.6806	2	-0.6806	2	NA	NA	NA	NA
FOXF1	HOXA1	Inhibition	-0.765058	3	-0.765058	3	NA	NA	NA	NA
FOXF1	ID3	Inhibition	-0.674251	3	-0.674251	3	NA	NA	NA	NA
FOXF1	JAZF1	Activation	0.646447	3	0.646447	3	NA	NA	NA	NA
FOXF1	JUN	Activation	0.759934	1	0.759934	1	NA	NA	NA	NA
FOXF1	KDM4C	Activation	0.798932	3	0.798932	3	NA	NA	NA	NA
FOXF1	LHX1	Inhibition	-0.900176	3	-0.900176	3	NA	NA	NA	NA
FOXF1	MECOM	Activation	0.7878	1	0.7878	1	NA	NA	NA	NA
FOXF1	MEF2A	Activation	0.77053	2	0.77053	2	NA	NA	NA	NA
FOXF1	MEF2C	Activation	0.861963	2.5	0.854676	2	NA	NA	0.86925	3
FOXF1	MESP1	Inhibition	-0.712145	3	-0.712145	3	NA	NA	NA	NA
FOXF1	MESP2	Inhibition	-0.737507	3	-0.777309	3	NA	NA	-0.697705	3
FOXF1	MIS18BP1	Inhibition	-0.820264	3	-0.820264	3	NA	NA	NA	NA
FOXF1	MITF	Activation	0.835903	2	0.835903	2	NA	NA	NA	NA
FOXF1	MIXL1	Inhibition	-0.706214	2	-0.711926	2	NA	NA	-0.700503	2
FOXF1	MXD1	Activation	0.826931	1	0.826931	1	NA	NA	NA	NA
FOXF1	MYBL2	Inhibition	-0.769185	2	-0.769185	2	NA	NA	NA	NA
FOXF1	NFE2L3	Inhibition	-0.687814	1	-0.717911	1	NA	NA	-0.657717	1
FOXF1	NFIA	Activation	0.663261	2	0.663261	2	NA	NA	NA	NA
FOXF1	NFIB	Activation	0.712101	3	0.712101	3	NA	NA	NA	NA
FOXF1	NKX2-5	Activation	0.735859	2	0.826842	1	NA	NA	0.644876	3
FOXF1	NR6A1	Inhibition	-0.749891	3	-0.749891	3	NA	NA	NA	NA
FOXF1	OTX2	Inhibition	-0.813845	3	-0.813845	3	NA	NA	NA	NA
FOXF1	PBX1	Activation	0.678605	2.66667	0.716098	3	0.67835	3	0.641367	2
FOXF1	PITX2	Activation	0.82478	3	0.82478	3	NA	NA	NA	NA
FOXF1	POU5F1	Inhibition	-0.767801	2	-0.851164	1	NA	NA	-0.684438	3
FOXF1	PRDM1	Inhibition	-0.654421	3	-0.654421	3	NA	NA	NA	NA
FOXF1	PROX1	Activation	0.789481	1	0.789481	1	NA	NA	NA	NA
FOXF1	RARB	Activation	0.742891	1	0.744719	1	NA	NA	0.741062	1
FOXF1	RARG	Inhibition	-0.705554	3	-0.757437	3	NA	NA	-0.653672	3
FOXF1	REPIN1	Activation	0.650707	1.5	0.64454	1	NA	NA	0.656874	2
FOXF1	RORB	Inhibition	-0.726115	1	-0.726115	1	NA	NA	NA	NA
FOXF1	SALL1	Inhibition	-0.829928	3	-0.829928	3	NA	NA	NA	NA
FOXF1	SALL3	Inhibition	-0.751773	2	-0.751773	2	NA	NA	NA	NA
FOXF1	SALL4	Inhibition	-0.733607	3	-0.733607	3	NA	NA	NA	NA
FOXF1	SCAPER	Activation	0.850099	2	0.850099	2	NA	NA	NA	NA
FOXF1	SP5	Inhibition	-0.837	2	-0.837	2	NA	NA	NA	NA
FOXF1	SPIB	Inhibition	-0.712693	1	-0.712693	1	NA	NA	NA	NA
FOXF1	SRY	Inhibition	-0.679508	1	-0.679508	1	NA	NA	NA	NA
FOXF1	TBX18	Activation	0.838922	3	0.838922	3	NA	NA	NA	NA
FOXF1	TBX2	Activation	0.81704	1	0.81704	1	NA	NA	NA	NA
FOXF1	TBX5	Activation	0.871977	2	0.871977	2	NA	NA	NA	NA
FOXF1	TBXT	Inhibition	-0.751727	2	-0.779056	2	NA	NA	-0.724397	2
FOXF1	TCF19	Inhibition	-0.759025	2	-0.759025	2	NA	NA	NA	NA
FOXF1	TCF21	Activation	0.860994	1	0.860994	1	NA	NA	NA	NA
FOXF1	TGIF1	Inhibition	-0.767741	1	-0.767741	1	NA	NA	NA	NA
FOXF1	TRPS1	Activation	0.774062	3	0.774062	3	NA	NA	NA	NA
FOXF1	TSC22D3	Activation	0.73718	1	0.73718	1	NA	NA	NA	NA
FOXF1	TSHZ2	Activation	0.791854	2	0.791854	2	NA	NA	NA	NA
FOXF1	TSHZ3	Activation	0.714429	3	0.714429	3	NA	NA	NA	NA
FOXF1	TWIST1	Activation	0.759403	1.5	0.762776	1	NA	NA	0.75603	2
FOXF1	VENTX	Inhibition	-0.727382	3	-0.727382	3	NA	NA	NA	NA
FOXF1	WDHD1	Inhibition	-0.819341	3	-0.819341	3	NA	NA	NA	NA
FOXF1	WT1	Activation	0.767019	3	0.767019	3	NA	NA	NA	NA
FOXF1	ZBTB20	Activation	0.784124	2	0.784124	2	NA	NA	NA	NA
FOXF1	ZEB1	Activation	0.793732	1	0.793732	1	NA	NA	NA	NA
FOXF1	ZFHX3	Activation	0.829469	1	0.829469	1	NA	NA	NA	NA
FOXF1	ZFP36L1	Activation	0.773651	2	0.773651	2	NA	NA	NA	NA
FOXF1	ZFP42	Inhibition	-0.788768	1	-0.788768	1	NA	NA	NA	NA
FOXF1	ZFPM2	Activation	0.846947	3	0.846947	3	NA	NA	NA	NA
FOXF1	ZIC2	Inhibition	-0.878956	1	-0.878956	1	NA	NA	NA	NA
FOXF1	ZIC3	Inhibition	-0.847597	3	-0.847597	3	NA	NA	NA	NA
FOXF1	ZIC5	Inhibition	-0.871306	1	-0.871306	1	NA	NA	NA	NA
FOXF1	ZMAT3	Activation	0.695126	3	0.695126	3	NA	NA	NA	NA
FOXF1	ZNF101	Inhibition	-0.771917	1	-0.771917	1	NA	NA	NA	NA
FOXF1	ZNF215	Inhibition	-0.71424	3	-0.71424	3	NA	NA	NA	NA
FOXF1	ZNF273	Inhibition	-0.795581	2	-0.795581	2	NA	NA	NA	NA
FOXF1	ZNF428	Activation	0.839247	1	0.839247	1	NA	NA	NA	NA
FOXF1	ZNF467	Activation	0.842834	1	0.842834	1	NA	NA	NA	NA
FOXF1	ZNF503	Activation	0.820268	1	0.820268	1	NA	NA	NA	NA
FOXF1	ZNF589	Inhibition	-0.848884	1	-0.848884	1	NA	NA	NA	NA
FOXF1	ZNF649	Inhibition	-0.857573	2	-0.857573	2	NA	NA	NA	NA
FOXF1	ZNF670	Inhibition	-0.777758	2	-0.777758	2	NA	NA	NA	NA
FOXF1	ZNF695	Inhibition	-0.77805	3	-0.77805	3	NA	NA	NA	NA
FOXF1	ZNF724	Inhibition	-0.84249	3	-0.84249	3	NA	NA	NA	NA
FOXF1	ZNF730	Inhibition	-0.756234	3	-0.756234	3	NA	NA	NA	NA
FOXF1	ZNF732	Inhibition	-0.844314	3	-0.844314	3	NA	NA	NA	NA
FOXF1	ZNF781	Activation	0.685914	1	0.685914	1	NA	NA	NA	NA
FOXF1	ZNF788P	Inhibition	-0.772473	3	-0.772473	3	NA	NA	NA	NA
FOXF1	ZNF90	Inhibition	-0.803054	3	-0.803054	3	NA	NA	NA	NA
FOXF1	ZNF93	Inhibition	-0.855675	3	-0.855675	3	NA	NA	NA	NA
FOXF1	ZSCAN10	Inhibition	-0.904225	1	-0.904225	1	NA	NA	NA	NA
FOXH1	ASH1L	Inhibition	-0.819503	2.5	-0.86805	3	NA	NA	-0.770956	2
FOXH1	BCL11A	Inhibition	-0.742218	2.33333	-0.671699	3	-0.754684	2	-0.800271	2
FOXH1	BHLHE40	Inhibition	-0.816688	3	-0.843579	3	-0.852759	3	-0.753728	3
FOXH1	BHLHE41	Inhibition	-0.7572	3	-0.7572	3	NA	NA	NA	NA
FOXH1	CARHSP1	Activation	0.687142	1	0.687142	1	NA	NA	NA	NA
FOXH1	CASZ1	Inhibition	-0.85848	3	-0.85848	3	NA	NA	NA	NA
FOXH1	CREB5	Inhibition	-0.752115	2.33333	-0.733756	2	-0.700647	3	-0.821944	2
FOXH1	EGR1	Inhibition	-0.741036	3	-0.758756	3	-0.723317	3	NA	NA
FOXH1	ETS2	Inhibition	-0.738819	3	-0.738819	3	NA	NA	NA	NA
FOXH1	FOXA3	Activation	0.78845	1	0.78845	1	NA	NA	NA	NA
FOXH1	FOXP1	Inhibition	-0.672815	2	-0.672815	2	NA	NA	NA	NA
FOXH1	GATA3	Activation	0.737221	2.66667	0.738482	3	0.703026	2	0.770155	3
FOXH1	HIF3A	Inhibition	-0.823682	3	-0.870554	3	-0.792165	3	-0.808328	3
FOXH1	HMGA1	Activation	0.845193	3	0.845193	3	NA	NA	NA	NA
FOXH1	HOPX	Inhibition	-0.712612	2	-0.708009	3	NA	NA	-0.717215	1
FOXH1	HOXA1	Activation	0.673117	3	0.649461	3	0.712601	3	0.657287	3
FOXH1	ID1	Activation	0.707416	2	0.69049	2	NA	NA	0.724342	2
FOXH1	ID3	Activation	0.699189	3	0.678022	3	0.661481	3	0.758064	3
FOXH1	IRF2	Inhibition	-0.78251	3	-0.801482	3	-0.730839	3	-0.815208	3
FOXH1	IRF9	Inhibition	-0.789786	3	-0.733605	3	-0.762571	3	-0.873181	3
FOXH1	IRX4	Inhibition	-0.824005	2	-0.809838	3	NA	NA	-0.838172	1
FOXH1	JAZF1	Inhibition	-0.791	2	-0.778818	3	NA	NA	-0.803181	1
FOXH1	JUN	Inhibition	-0.787806	2	-0.764428	1	-0.831161	3	-0.76783	2
FOXH1	JUNB	Inhibition	-0.729519	2.5	-0.648025	2	-0.811014	3	NA	NA
FOXH1	KDM4C	Inhibition	-0.75744	1	-0.75744	1	NA	NA	NA	NA
FOXH1	LEF1	Activation	0.73266	3	0.653207	3	0.766352	3	0.778423	3
FOXH1	LHX1	Activation	0.738048	1	0.738048	1	NA	NA	NA	NA
FOXH1	MEF2A	Inhibition	-0.788034	3	-0.788034	3	NA	NA	NA	NA
FOXH1	MIS18BP1	Activation	0.801637	1	0.801637	1	NA	NA	NA	NA
FOXH1	MSX1	Activation	0.721208	3	0.721208	3	NA	NA	NA	NA
FOXH1	MSX2	Activation	0.705109	3	0.661062	3	NA	NA	0.749155	3
FOXH1	MXD1	Inhibition	-0.693752	2.5	-0.730664	3	-0.656839	2	NA	NA
FOXH1	MYCN	Activation	0.711068	3	0.711068	3	NA	NA	NA	NA
FOXH1	NFATC2	Inhibition	-0.679772	1	-0.679772	1	NA	NA	NA	NA
FOXH1	NFIA	Inhibition	-0.836898	1.5	-0.858965	2	-0.814831	1	NA	NA
FOXH1	NFIB	Inhibition	-0.826995	1.5	-0.82971	2	-0.82428	1	NA	NA
FOXH1	NFIC	Inhibition	-0.831016	2.66667	-0.841767	3	-0.847295	2	-0.803987	3
FOXH1	NKX2-5	Inhibition	-0.748736	2	-0.748736	2	NA	NA	NA	NA
FOXH1	NR3C1	Inhibition	-0.84927	2.33333	-0.880341	3	-0.815109	3	-0.85236	1
FOXH1	NR6A1	Activation	0.851288	1.5	0.827571	1	NA	NA	0.875005	2
FOXH1	OVOL2	Activation	0.774919	2	0.782476	3	NA	NA	0.767362	1
FOXH1	PLAGL1	Inhibition	-0.691395	1.5	-0.659029	2	-0.723762	1	NA	NA
FOXH1	PRDM16	Inhibition	-0.794592	2	-0.769519	3	NA	NA	-0.819664	1
FOXH1	PROX1	Inhibition	-0.672819	3	-0.672819	3	NA	NA	NA	NA
FOXH1	SALL2	Activation	0.761193	2	0.748598	1	0.706348	2	0.828634	3
FOXH1	SALL3	Activation	0.702127	1	0.702127	1	NA	NA	NA	NA
FOXH1	SALL4	Activation	0.846873	1	0.846873	1	NA	NA	NA	NA
FOXH1	SKIL	Inhibition	-0.704845	3	-0.710092	3	NA	NA	-0.699598	3
FOXH1	SP6	Activation	0.660698	2.33333	0.644938	2	0.671599	2	0.665558	3
FOXH1	SRY	Activation	0.727386	1	0.727386	1	NA	NA	NA	NA
FOXH1	STAT3	Inhibition	-0.821181	2.66667	-0.816873	3	-0.789946	2	-0.856724	3
FOXH1	STAT4	Inhibition	-0.793362	2.5	-0.776151	2	NA	NA	-0.810572	3
FOXH1	TBX18	Inhibition	-0.791616	1	-0.762298	1	-0.820934	1	NA	NA
FOXH1	TCF25	Inhibition	-0.771609	2.33333	-0.793216	3	-0.728084	2	-0.793525	2
FOXH1	TFAP2C	Activation	0.71062	2	0.71062	2	NA	NA	NA	NA
FOXH1	VENTX	Activation	0.656371	1	0.656371	1	NA	NA	NA	NA
FOXH1	WDHD1	Activation	0.848831	1	0.848831	1	NA	NA	NA	NA
FOXH1	ZEB1	Inhibition	-0.752065	3	-0.81124	3	-0.668364	3	-0.776591	3
FOXH1	ZFP36L1	Inhibition	-0.805418	1	-0.805418	1	NA	NA	NA	NA
FOXH1	ZFP42	Activation	0.798412	1.5	0.790073	1	NA	NA	0.806752	2
FOXH1	ZFPM2	Inhibition	-0.692742	1	-0.692742	1	NA	NA	NA	NA
FOXH1	ZMAT3	Inhibition	-0.765361	3	-0.765361	3	NA	NA	NA	NA
FOXH1	ZNF124	Activation	0.776865	2	0.779914	2	NA	NA	0.773816	2
FOXH1	ZNF215	Activation	0.786355	1	0.786355	1	NA	NA	NA	NA
FOXH1	ZNF25	Inhibition	-0.763053	2.5	-0.797365	3	NA	NA	-0.728741	2
FOXH1	ZNF385B	Inhibition	-0.808691	2	-0.824029	3	-0.800751	2	-0.801292	1
FOXH1	ZNF428	Inhibition	-0.747017	1.5	-0.699167	1	NA	NA	-0.794867	2
FOXH1	ZNF436	Inhibition	-0.802424	2	-0.748515	1	NA	NA	-0.856332	3
FOXH1	ZNF611	Activation	0.694763	1.5	0.67749	2	0.712036	1	NA	NA
FOXH1	ZNF704	Inhibition	-0.658321	1	-0.658321	1	NA	NA	NA	NA
FOXH1	ZNF724	Activation	0.761433	1	0.761433	1	NA	NA	NA	NA
FOXH1	ZNF730	Activation	0.769433	1	0.769433	1	NA	NA	NA	NA
FOXM1	BCL11A	Inhibition	-0.747929	3	-0.678611	3	-0.730765	3	-0.834413	3
FOXM1	BHLHE40	Inhibition	-0.835749	3	-0.82285	3	-0.84629	3	-0.838106	3
FOXM1	BHLHE41	Inhibition	-0.791373	3	-0.791373	3	NA	NA	NA	NA
FOXM1	CASZ1	Inhibition	-0.890709	1	-0.876699	1	NA	NA	-0.90472	1
FOXM1	CREB5	Inhibition	-0.71831	2	-0.769091	1	-0.667529	3	NA	NA
FOXM1	EGR1	Inhibition	-0.670714	1	-0.670714	1	NA	NA	NA	NA
FOXM1	ETS2	Inhibition	-0.80558	3	-0.808678	3	-0.740228	3	-0.867832	3
FOXM1	FOXA3	Activation	0.834989	1	0.834989	1	NA	NA	NA	NA
FOXM1	GATA3	Activation	0.770492	3	0.732974	3	NA	NA	0.808009	3
FOXM1	GRHL2	Activation	0.762099	1.5	0.658664	1	NA	NA	0.865533	2
FOXM1	HAND1	Activation	0.67931	3	0.634401	3	NA	NA	0.724218	3
FOXM1	HMGA1	Activation	0.889244	3	0.889244	3	NA	NA	NA	NA
FOXM1	HOPX	Inhibition	-0.667887	2	-0.66847	3	NA	NA	-0.667304	1
FOXM1	HOXA1	Activation	0.747358	3	0.704897	3	0.749137	3	0.788039	3
FOXM1	ID1	Activation	0.762602	2.5	0.681112	2	NA	NA	0.844092	3
FOXM1	ID3	Activation	0.818296	3	0.735209	3	0.793796	3	0.925882	3
FOXM1	IRF2	Inhibition	-0.871899	3	-0.890432	3	-0.795448	3	-0.929817	3
FOXM1	JAZF1	Inhibition	-0.831665	3	-0.850167	3	-0.743667	3	-0.901161	3
FOXM1	JUNB	Inhibition	-0.773672	3	-0.653806	3	-0.836691	3	-0.830518	3
FOXM1	LEF1	Activation	0.734877	3	0.630838	3	0.758272	3	0.815522	3
FOXM1	LHX1	Activation	0.702926	2.33333	0.710665	1	0.679014	3	0.719097	3
FOXM1	MAF	Inhibition	-0.785388	1	-0.785388	1	NA	NA	NA	NA
FOXM1	MEF2A	Inhibition	-0.880784	1	-0.880784	1	NA	NA	NA	NA
FOXM1	MSX1	Activation	0.720082	3	0.710728	3	0.643783	3	0.805734	3
FOXM1	MSX2	Activation	0.764727	3	0.671346	3	NA	NA	0.858107	3
FOXM1	MXD1	Inhibition	-0.768108	2	-0.768108	2	NA	NA	NA	NA
FOXM1	MYCL	Activation	0.86983	2	0.874359	3	0.865301	1	NA	NA
FOXM1	MYRF	Inhibition	-0.643199	1	-0.643199	1	NA	NA	NA	NA
FOXM1	NFATC2	Inhibition	-0.790574	1	-0.790574	1	NA	NA	NA	NA
FOXM1	NFIA	Inhibition	-0.912173	2	-0.868152	1	-0.904	3	-0.964367	2
FOXM1	NFIB	Inhibition	-0.876827	2	-0.856188	1	-0.825375	3	-0.948918	2
FOXM1	NFIC	Inhibition	-0.88861	2.5	-0.887537	3	-0.889682	2	NA	NA
FOXM1	NR3C1	Inhibition	-0.862208	2.66667	-0.871091	3	-0.792321	3	-0.923213	2
FOXM1	NR6A1	Activation	0.89585	1	0.89585	1	NA	NA	NA	NA
FOXM1	OVOL2	Activation	0.842118	1	0.842118	1	NA	NA	NA	NA
FOXM1	PLAGL1	Inhibition	-0.791701	2	-0.677602	3	-0.9058	1	NA	NA
FOXM1	PRDM1	Activation	0.753829	3	0.655355	3	0.767264	3	0.838868	3
FOXM1	SALL1	Activation	0.827834	2.33333	0.727874	1	0.876237	3	0.87939	3
FOXM1	SALL2	Activation	0.853859	3	0.80249	3	0.899063	3	0.860024	3
FOXM1	SALL4	Activation	0.895633	1	0.895633	1	NA	NA	NA	NA
FOXM1	SP6	Activation	0.683009	3	0.709609	3	0.640663	3	0.698756	3
FOXM1	SRY	Activation	0.755499	1	0.754748	1	0.756251	1	NA	NA
FOXM1	STAT3	Inhibition	-0.873933	3	-0.850659	3	-0.84648	3	-0.924659	3
FOXM1	TBX18	Inhibition	-0.846135	1	-0.825581	1	-0.866689	1	NA	NA
FOXM1	TCF25	Inhibition	-0.860583	2	-0.829399	3	-0.891766	1	NA	NA
FOXM1	TOX3	Activation	0.665868	3	0.665868	3	NA	NA	NA	NA
FOXM1	TP53	Activation	0.734596	3	0.734596	3	NA	NA	NA	NA
FOXM1	WT1	Inhibition	-0.804683	1	-0.804683	1	NA	NA	NA	NA
FOXM1	ZEB1	Inhibition	-0.84219	3	-0.84219	3	NA	NA	NA	NA
FOXM1	ZFP42	Activation	0.861705	1	0.861705	1	NA	NA	NA	NA
FOXM1	ZMAT4	Inhibition	-0.645475	3	-0.645475	3	NA	NA	NA	NA
FOXM1	ZNF124	Activation	0.838264	3	0.839673	3	0.82272	3	0.852398	3
FOXM1	ZNF25	Inhibition	-0.872631	2.66667	-0.90375	3	-0.883125	2	-0.831017	3
FOXM1	ZNF428	Inhibition	-0.731825	2	-0.731825	2	NA	NA	NA	NA
FOXM1	ZNF436	Inhibition	-0.912944	2	-0.882111	1	NA	NA	-0.943778	3
FOXM1	ZNF611	Activation	0.721848	3	0.788583	3	0.721068	3	0.655894	3
FOXM1	ZNF670	Activation	0.865793	1	0.865793	1	NA	NA	NA	NA
FOXM1	ZNF704	Inhibition	-0.697008	1	-0.697008	1	NA	NA	NA	NA
FOXM1	ZNF724	Activation	0.757205	1	0.757205	1	NA	NA	NA	NA
FOXO1	CAMTA2	Inhibition	-0.681788	2.33333	-0.724001	3	-0.647692	2	-0.67367	2
FOXO1	CARHSP1	Activation	0.716013	2.66667	0.665087	2	0.725117	3	0.757834	3
FOXO1	CDX2	Activation	0.734771	2.66667	0.719429	3	0.694283	2	0.790601	3
FOXO1	DACH1	Inhibition	-0.795965	3	-0.774995	3	NA	NA	-0.816935	3
FOXO1	EOMES	Activation	0.774582	3	0.777217	3	0.726884	3	0.819645	3
FOXO1	EPAS1	Inhibition	-0.69037	2	-0.69037	2	NA	NA	NA	NA
FOXO1	ESRRG	Inhibition	-0.726449	2.5	-0.663931	2	NA	NA	-0.788968	3
FOXO1	ETV4	Activation	0.789514	1	0.719593	1	0.78645	1	0.8625	1
FOXO1	EVX1	Activation	0.735088	3	0.75534	3	NA	NA	0.714836	3
FOXO1	FOSL2	Inhibition	-0.687883	3	-0.687883	3	NA	NA	NA	NA
FOXO1	FOXC1	Activation	0.679367	3	0.679367	3	NA	NA	NA	NA
FOXO1	FOXF1	Inhibition	-0.651603	1	-0.651603	1	NA	NA	NA	NA
FOXO1	FOXP1	Inhibition	-0.754285	2.66667	-0.723203	3	-0.780457	3	-0.759195	2
FOXO1	GATA4	Inhibition	-0.813065	2.5	-0.789054	3	NA	NA	-0.837075	2
FOXO1	GATA5	Inhibition	-0.750646	1.5	-0.747827	2	NA	NA	-0.753466	1
FOXO1	GLI3	Inhibition	-0.738479	2	-0.694764	2	NA	NA	-0.782193	2
FOXO1	GSC	Activation	0.699599	2	0.664565	2	0.736474	2	0.697759	2
FOXO1	HAND2	Inhibition	-0.790824	2.66667	-0.778294	3	-0.742477	3	-0.8517	2
FOXO1	HEY1	Inhibition	-0.70088	2	-0.715408	2	NA	NA	-0.686353	2
FOXO1	HOXB2	Inhibition	-0.81762	1.33333	-0.742713	1	-0.814046	2	-0.8961	1
FOXO1	HOXB3	Inhibition	-0.791491	1.66667	-0.799932	2	-0.739243	2	-0.835298	1
FOXO1	ID2	Inhibition	-0.729151	1.5	-0.675553	2	NA	NA	-0.78275	1
FOXO1	ISL1	Inhibition	-0.777641	1	-0.777641	1	NA	NA	NA	NA
FOXO1	LHX1	Activation	0.774631	3	0.770103	3	0.764842	3	0.788948	3
FOXO1	MEF2C	Inhibition	-0.805787	2.66667	-0.813182	3	-0.708223	3	-0.895956	2
FOXO1	MEIS1	Inhibition	-0.746838	1	-0.743357	1	-0.750319	1	NA	NA
FOXO1	MEIS2	Inhibition	-0.784214	1.33333	-0.800027	1	-0.752536	2	-0.800081	1
FOXO1	MESP1	Activation	0.711807	3	0.728929	3	0.758252	3	0.648239	3
FOXO1	MESP2	Activation	0.762411	3	0.817292	3	0.701164	3	0.768775	3
FOXO1	MITF	Inhibition	-0.670203	3	-0.66448	3	NA	NA	-0.675926	3
FOXO1	MIXL1	Activation	0.735633	2	0.735633	2	NA	NA	NA	NA
FOXO1	MYC	Activation	0.801306	1	0.746295	1	NA	NA	0.856318	1
FOXO1	MYRF	Inhibition	-0.661267	2	-0.655426	2	NA	NA	-0.667108	2
FOXO1	NFE2L3	Activation	0.793458	1	0.760176	1	NA	NA	0.826741	1
FOXO1	OTX2	Activation	0.668648	1.5	0.640586	2	NA	NA	0.696711	1
FOXO1	PBX1	Inhibition	-0.771951	2	-0.718492	2	-0.811521	2	-0.785841	2
FOXO1	POU5F1	Activation	0.783279	2.66667	0.750078	2	0.746204	3	0.853557	3
FOXO1	PPARG	Inhibition	-0.666688	2	-0.666688	2	NA	NA	NA	NA
FOXO1	RARB	Inhibition	-0.799911	1.66667	-0.784652	2	-0.800691	2	-0.814389	1
FOXO1	SALL3	Activation	0.70189	2.33333	0.69256	3	0.690834	3	0.722275	1
FOXO1	SMAD9	Inhibition	-0.822392	1	-0.782907	1	NA	NA	-0.861877	1
FOXO1	SOX2	Activation	0.810797	1	0.810797	1	NA	NA	NA	NA
FOXO1	SP5	Activation	0.767652	2.33333	0.769838	2	0.784208	3	0.74891	2
FOXO1	TBX2	Inhibition	-0.733232	2.5	-0.735772	3	NA	NA	-0.730692	2
FOXO1	TBX5	Inhibition	-0.715528	2.5	-0.695332	3	NA	NA	-0.735725	2
FOXO1	TBXT	Activation	0.779983	2	0.813421	2	0.688862	2	0.837666	2
FOXO1	TCF21	Inhibition	-0.671575	1.5	-0.694356	1	NA	NA	-0.648793	2
FOXO1	TGIF1	Activation	0.668388	3	0.637871	3	0.691331	3	0.67596	3
FOXO1	TRPS1	Inhibition	-0.632624	2	-0.632624	2	NA	NA	NA	NA
FOXO1	TSC22D3	Inhibition	-0.714176	2	-0.713842	2	-0.714511	2	NA	NA
FOXO1	TSHZ2	Inhibition	-0.668628	1.66667	-0.689499	2	-0.670662	2	-0.645723	1
FOXO1	TWIST1	Inhibition	-0.714394	1	-0.714394	1	NA	NA	NA	NA
FOXO1	ZEB1	Inhibition	-0.693535	1	-0.687907	1	-0.7062	1	-0.6865	1
FOXO1	ZFPM2	Inhibition	-0.708359	2.66667	-0.65348	3	-0.696178	3	-0.775419	2
FOXO1	ZIC2	Activation	0.761275	2	0.7641	3	0.70101	2	0.818715	1
FOXO1	ZIC3	Activation	0.779876	3	0.741535	3	0.799526	3	0.798567	3
FOXO1	ZIC5	Activation	0.737088	2.5	0.767908	3	0.706267	2	NA	NA
FOXO1	ZNF428	Inhibition	-0.666065	2.5	-0.672759	2	-0.659371	3	NA	NA
FOXO1	ZNF503	Inhibition	-0.752841	2	-0.768294	2	-0.676184	2	-0.814045	2
FOXO1	ZNF516	Inhibition	-0.699224	1.5	-0.671576	2	NA	NA	-0.726872	1
FOXO1	ZNF589	Activation	0.747642	1	0.705468	1	NA	NA	0.789817	1
FOXO1	ZNF649	Activation	0.739502	1	0.713743	1	0.674001	1	0.830761	1
FOXO1	ZNF732	Activation	0.691411	3	0.680902	3	0.70192	3	NA	NA
FOXO1	ZNF860	Activation	0.763688	1	0.763688	1	NA	NA	NA	NA
FOXO1	ZNF883	Activation	0.654862	3	0.654862	3	NA	NA	NA	NA
FOXO1	ZNF93	Activation	0.679026	2.66667	0.636601	2	0.655246	3	0.745231	3
FOXO1	ZSCAN10	Activation	0.726603	1.33333	0.725941	2	0.690823	1	0.763044	1
FOXP1	AHR	Activation	0.689655	1	0.689655	1	NA	NA	NA	NA
FOXP1	ARID5B	Activation	0.87403	3	0.926944	3	0.839	3	0.856146	3
FOXP1	BCL11A	Activation	0.732089	3	0.67963	3	NA	NA	0.784548	3
FOXP1	BHLHE40	Activation	0.718556	3	0.755207	3	0.681904	3	NA	NA
FOXP1	BHLHE41	Activation	0.717615	3	0.717615	3	NA	NA	NA	NA
FOXP1	CAMTA2	Activation	0.836103	1	0.836103	1	NA	NA	NA	NA
FOXP1	CASZ1	Activation	0.887087	2	0.817452	1	0.945712	2	0.898096	3
FOXP1	CDX2	Inhibition	-0.715768	3	-0.70318	3	NA	NA	-0.728355	3
FOXP1	CEBPD	Activation	0.801032	2.33333	0.887668	3	0.71534	1	0.800088	3
FOXP1	E2F7	Inhibition	-0.827519	2.33333	-0.815702	2	-0.84917	2	-0.817684	3
FOXP1	EGR1	Activation	0.763123	2	0.763123	2	NA	NA	NA	NA
FOXP1	EOMES	Inhibition	-0.783718	2	-0.837519	2	-0.753253	2	-0.760381	2
[truncated: 21,007 more rows]
